# Supplementary material for: The cuproptosis-related gene ITGB6 and LTBP1 may be associated with diabetic kidney disease progression and immune cell infiltration
Source: PeerJ. 2025 Nov 11;13:e20346. doi: 10.7717/peerj.20346 (PMC12617370; doi:10.7717/peerj.20346)
Supplement: Supplemental Information 2 — Raw expression data of the cuproptosis-related genes ITGB6 and LTBP1 in MPC5 cells cultured under 30 mM glucose condition [file peerj-13-20346-s002.xlsx]

## Sheet: Raw_Ct
time_h	group	replicate	actin_Ct	LIB_Ct	IGB_Ct
24	NC	1	15.899	23.497	26.88
24	NC	2	15.864	23.842	27.365
24	NC	3	15.921	24.109	27
24	M	1	15.987	23.25	26.465
24	M	2	15.63	23.005	25.344
24	M	3	15.704	23.822	26.187
48	NC	1	16.006	23.745	27.05
48	NC	2	15.855	23.791	26.893
48	NC	3	15.676	23.682	27.089
48	M	1	15.884	22.816	25.899
48	M	2	15.85	22.906	25.917
48	M	3	15.886	22.617	25.552
72	NC	1	15.816	23.595	26.622
72	NC	2	15.786	23.632	27.237
72	NC	3	15.917	23.708	26.739
72	M	1	15.886	22.253	25.604
72	M	2	15.916	23.126	26.012
72	M	3	15.679	23.121	25.298

## Sheet: ΔCt_ΔΔCt_Fold
time_h	group	replicate	actin_Ct	LIB_Ct	IGB_Ct	ΔCt_LIB	ΔΔCt_LIB	Fold_LIB	ΔCt_IGB	ΔΔCt_IGB	Fold_IGB
24	NC	1	15.899	23.497	26.88	7.598	-0.323333	1.251	10.981	-0.206	1.153
24	NC	2	15.864	23.842	27.365	7.978	0.0566667	0.961	11.501	0.314	0.804
24	NC	3	15.921	24.109	27	8.188	0.266667	0.831	11.079	-0.108	1.078
24	M	1	15.987	23.25	26.465	7.263	-0.658333	1.578	10.478	-0.709	1.635
24	M	2	15.63	23.005	25.344	7.375	-0.546333	1.46	9.714	-1.473	2.776
24	M	3	15.704	23.822	26.187	8.118	0.196667	0.873	10.483	-0.704	1.629
48	NC	1	16.006	23.745	27.05	7.739	-0.154667	1.113	11.044	-0.121	1.087
48	NC	2	15.855	23.791	26.893	7.936	0.0423333	0.971	11.038	-0.127	1.092
48	NC	3	15.676	23.682	27.089	8.006	0.112333	0.925	11.413	0.248	0.842
48	M	1	15.884	22.816	25.899	6.932	-0.961667	1.948	10.015	-1.15	2.219
48	M	2	15.85	22.906	25.917	7.056	-0.837667	1.787	10.067	-1.098	2.141
48	M	3	15.886	22.617	25.552	6.731	-1.16267	2.239	9.666	-1.499	2.826
72	NC	1	15.816	23.595	26.622	7.779	-0.0263333	1.018	10.806	-0.220333	1.165
72	NC	2	15.786	23.632	27.237	7.846	0.0406667	0.972	11.451	0.424667	0.745
72	NC	3	15.917	23.708	26.739	7.791	-0.0143333	1.01	10.822	-0.204333	1.152
72	M	1	15.886	22.253	25.604	6.367	-1.43833	2.71	9.718	-1.30833	2.477
72	M	2	15.916	23.126	26.012	7.21	-0.595333	1.511	10.096	-0.930333	1.906
72	M	3	15.679	23.121	25.298	7.442	-0.363333	1.286	9.619	-1.40733	2.652
