# Supplementary material for: The cuproptosis-related gene ITGB6 and LTBP1 may be associated with diabetic kidney disease progression and immune cell infiltration
Source: PeerJ journal article supplement (doi:10.7717/peerj.20346), 2025-11-11
Supplement: Supplementary_raw_data.zip [file 02.go_sig_vertical_bar.pdf › supplementary file/09_enrichment/GO/02.go_sig_vertical_bar.pdf]

encapsulating s  
extracellular s  
extracellular  
reg  
treonine kin  
en–containin  
endopla  
complex inv  
lular matrix  
stituent conf
