# Supplementary material for: The cuproptosis-related gene ITGB6 and LTBP1 may be associated with diabetic kidney disease progression and immune cell infiltration
Source: PeerJ journal article supplement (doi:10.7717/peerj.20346), 2025-11-11
Supplement: Supplementary_raw_data.zip [file 03.go_circle.pdf › supplementary file/09_enrichment/GO/03.go_circle.pdf]

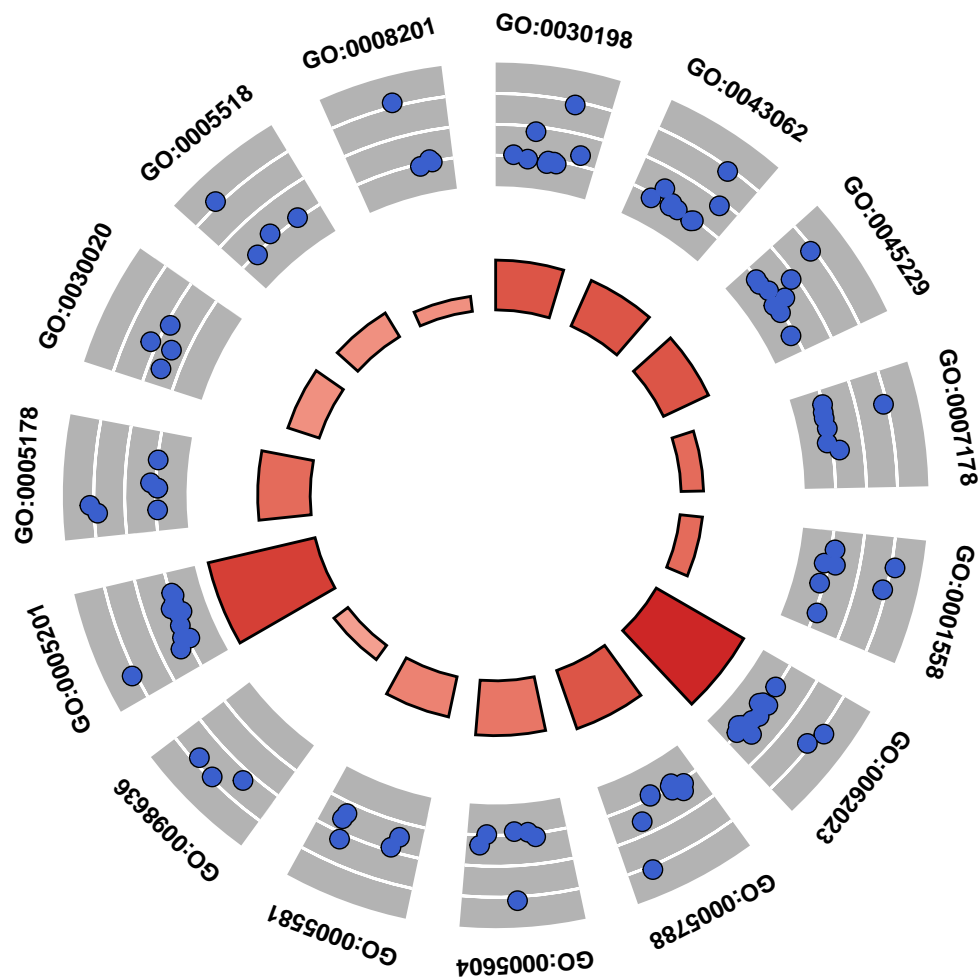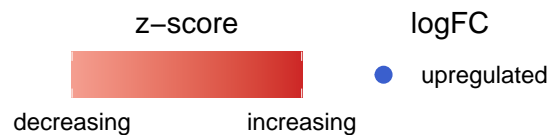

| ID         | Description                                                              |
|------------|--------------------------------------------------------------------------|
| GO:0030198 | extracellular matrix organization                                        |
| GO:0043062 | extracellular structure organization                                     |
| GO:0045229 | external encapsulating structure organization                            |
| GO:0007178 | transmembrane receptor protein serine/threonine kinase signaling pathway |
| GO:0001558 | regulation of cell growth                                                |
| GO:0062023 | collagen–containing extracellular matrix                                 |
| GO:0005788 | endoplasmic reticulum lumen                                              |
| GO:0005604 | basement membrane                                                        |
| GO:0005581 | collagen trimer                                                          |
| GO:0098636 | protein complex involved in cell adhesion                                |
| GO:0005201 | extracellular matrix structural constituent                              |
| GO:0005178 | integrin binding                                                         |
| GO:0030020 | extracellular matrix structural constituent conferring tensile strength  |
| GO:0005518 | collagen binding                                                         |
| GO:0008201 | heparin binding                                                          |
