# Supplementary material for: The cuproptosis-related gene ITGB6 and LTBP1 may be associated with diabetic kidney disease progression and immune cell infiltration
Source: PeerJ journal article supplement (doi:10.7717/peerj.20346), 2025-11-11
Supplement: Supplementary_raw_data.zip [file classification.docx]

| **[clr](javascript:clearChecked(document.listForm);" \o "Clear all selections on current page)** 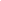**[all](javascript:checkAll(document.listForm);" \o "Select all items on current page)** 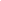 | | |  | | --- |  | **[Gene ID](javascript:listAction(document.listForm, '/list/list.do?filterLevel=1&sortField=GENE_ID&listType=1&sortOrder=1&trackingId=8B22855892E5D0F99E01BEA13F3240DD&species=All'))** | | --- | | **Mapped IDs** | |  | | --- |  | **[Gene Name](javascript:listAction(document.listForm, '/list/list.do?filterLevel=1&sortField=GENE_NAME&listType=1&sortOrder=1&trackingId=8B22855892E5D0F99E01BEA13F3240DD&species=All'))** | | --- |  | **[Gene Symbol](javascript:listAction(document.listForm, '/list/list.do?filterLevel=1&sortField=GENE_SYMBOL&listType=1&sortOrder=1&trackingId=8B22855892E5D0F99E01BEA13F3240DD&species=All'))** | | --- |  | **[Persistent id](javascript:listAction(document.listForm, '/list/list.do?filterLevel=1&sortField=PUBLIC_ID&listType=1&sortOrder=1&trackingId=8B22855892E5D0F99E01BEA13F3240DD&species=All'))** | | --- |  | **Orthologs** | | --- | | | [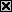](javascript:listAction(document.listForm,%20'/list/modifyPref.jsp?list_type_request=1%26col=GENE_BEST_FAM_SUBFAM_HIT%26url=/list/list.do?page=1%26filterLevel=1%26listType=1%26trackingId=8B22855892E5D0F99E01BEA13F3240DD')) | | --- |  | **[PANTHER Family/Subfamily](javascript:listAction(document.listForm, '/list/list.do?filterLevel=1&sortField=PANTHER_BEST_HIT&listType=1&sortOrder=1&trackingId=8B22855892E5D0F99E01BEA13F3240DD&species=All'))** | | --- | | | [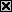](javascript:listAction(document.listForm,%20'/list/modifyPref.jsp?list_type_request=1%26col=GENE_PC_PROC%26url=/list/list.do?page=1%26filterLevel=1%26listType=1%26trackingId=8B22855892E5D0F99E01BEA13F3240DD')) | | --- |  | **[PANTHER Protein Class](javascript:listAction(document.listForm, '/list/list.do?filterLevel=1&sortField=PANTHER_PROTEIN_CLASS&listType=1&sortOrder=1&trackingId=8B22855892E5D0F99E01BEA13F3240DD&species=All'))** | | --- | | | [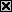](javascript:listAction(document.listForm,%20'/list/modifyPref.jsp?list_type_request=1%26col=GENE_SPECIES%26url=/list/list.do?page=1%26filterLevel=1%26listType=1%26trackingId=8B22855892E5D0F99E01BEA13F3240DD')) | | --- |  | **[Species](javascript:listAction(document.listForm, '/list/list.do?filterLevel=1&sortField=SPECIES&listType=1&sortOrder=1&trackingId=8B22855892E5D0F99E01BEA13F3240DD&species=All'))** | | --- | |
| --- | --- | --- | --- | --- | --- | --- | --- | --- | --- | --- | --- | --- | --- | --- | --- | --- | --- | --- | --- | --- |
|  | **1.** | [HUMAN|HGNC=6714|UniProtKB=Q14766](https://www.pantherdb.org/genes/gene.do?acc=HUMAN|HGNC=6714|UniProtKB=Q14766) | LTBP1 | Latent-transforming growth factor beta-binding protein 1 [LTBP1](https://www.pantherdb.org/genes/gene.do?acc=HUMAN|HGNC=6714|UniProtKB=Q14766) [PTN002513800](https://www.pantherdb.org/node/node.jsp?id=PTN002513800) [orthologs](https://www.pantherdb.org/genes/gene.do?acc=HUMAN|HGNC=6714|UniProtKB=Q14766" \l "orthologs) | [LATENT-TRANSFORMING GROWTH FACTOR BETA-BINDING PROTEIN 1 (PTHR24034:SF140)](https://www.pantherdb.org/panther/family.do?clsAccession=PTHR24034:SF140) | [extracellular matrix structural protein](https://www.pantherdb.org/panther/category.do?categoryAcc=PC00103) | Homo sapiens |
|  | **2.** | [HUMAN|HGNC=6161|UniProtKB=P18564](https://www.pantherdb.org/genes/gene.do?acc=HUMAN|HGNC=6161|UniProtKB=P18564) | ITGB6 | Integrin beta-6 [ITGB6](https://www.pantherdb.org/genes/gene.do?acc=HUMAN|HGNC=6161|UniProtKB=P18564) [PTN002467823](https://www.pantherdb.org/node/node.jsp?id=PTN002467823) [orthologs](https://www.pantherdb.org/genes/gene.do?acc=HUMAN|HGNC=6161|UniProtKB=P18564" \l "orthologs) | [INTEGRIN BETA-6 (PTHR10082:SF11)](https://www.pantherdb.org/panther/family.do?clsAccession=PTHR10082:SF11) | [integrin](https://www.pantherdb.org/panther/category.do?categoryAcc=PC00126) | Homo sapiens |

Url： [http://www.pantherdb.org](http://www.pantherdb.org/" \t "https://www.ncbi.nlm.nih.gov/pmc/articles/PMC7778891/_blank)

[pantherdb.org/geneListAnalysis.do](https://www.pantherdb.org/geneListAnalysis.do)
