# Supplementary material for: The cuproptosis-related gene ITGB6 and LTBP1 may be associated with diabetic kidney disease progression and immune cell infiltration
Source: PeerJ journal article supplement (doi:10.7717/peerj.20346), 2025-11-11
Supplement: Supplementary_raw_data.zip [file DEGs_hub.xls]

## Sheet: Sheet1
gene
ITGB6
LTBP1
