# Supplementary figures and images for: The cuproptosis-related gene ITGB6 and LTBP1 may be associated with diabetic kidney disease progression and immune cell infiltration
Source: PeerJ journal article supplement (doi:10.7717/peerj.20346), 2025-11-11

# Diabetic Nephropathy vs Normal

*Pvalue: 0.05; logFC: 2.00; Up: 229; Down: 2854; Total: 3083*

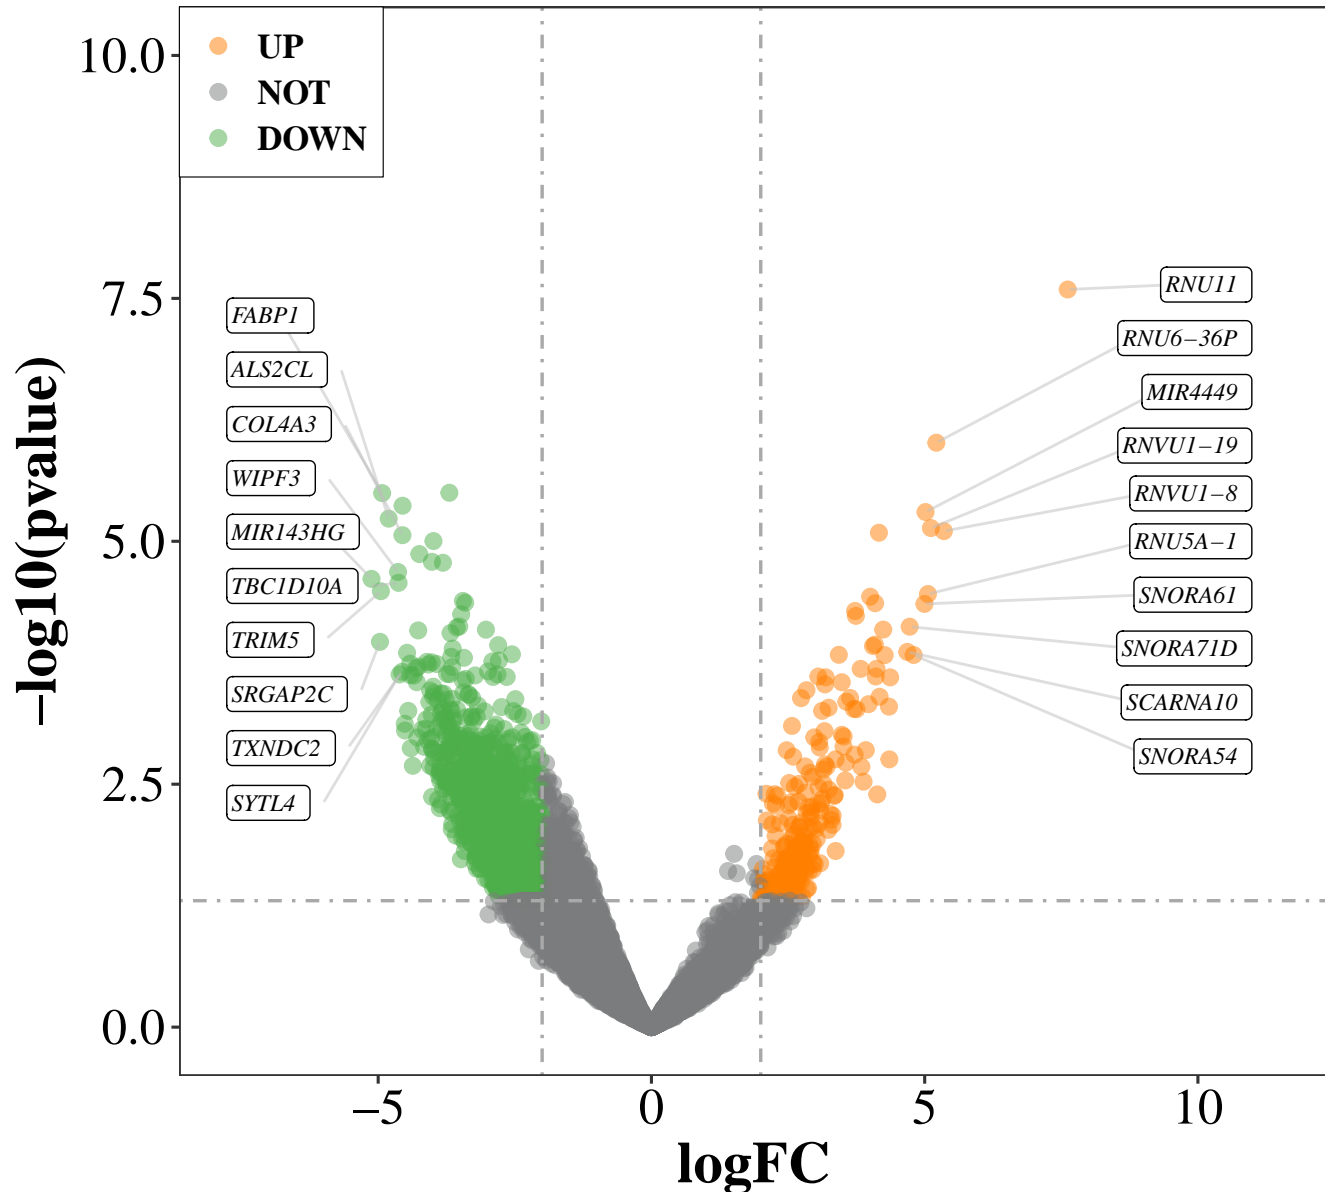

Supplement: Supplementary_raw_data.zip [file 04.GSE162830_volcano.pdf › supplementary file/01_DEGs/04.GSE162830_volcano.pdf]

# Diabetic Nephropathy vs Normal

*padj: 0.05; logFC: 1.00; Up: 107; Down: 259; Total: 366*

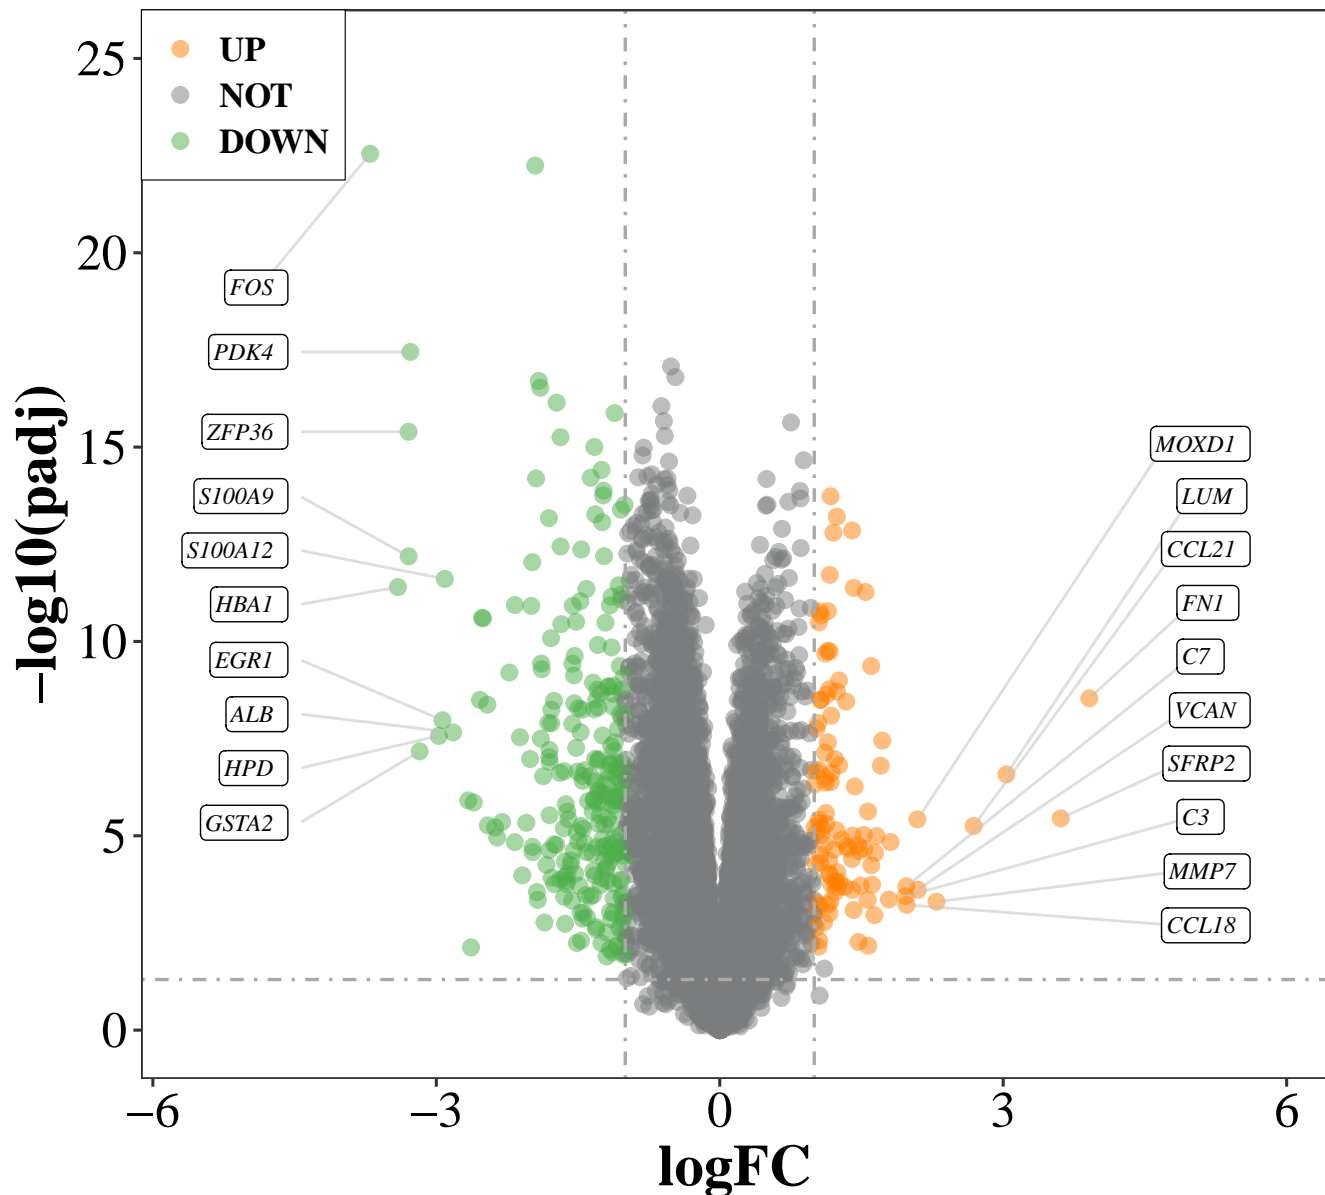

Supplement: Supplementary_raw_data.zip [file 04.GSE96804_volcano.pdf › supplementary file/01_DEGs/04.GSE96804_volcano.pdf]

Distribution as heatmap

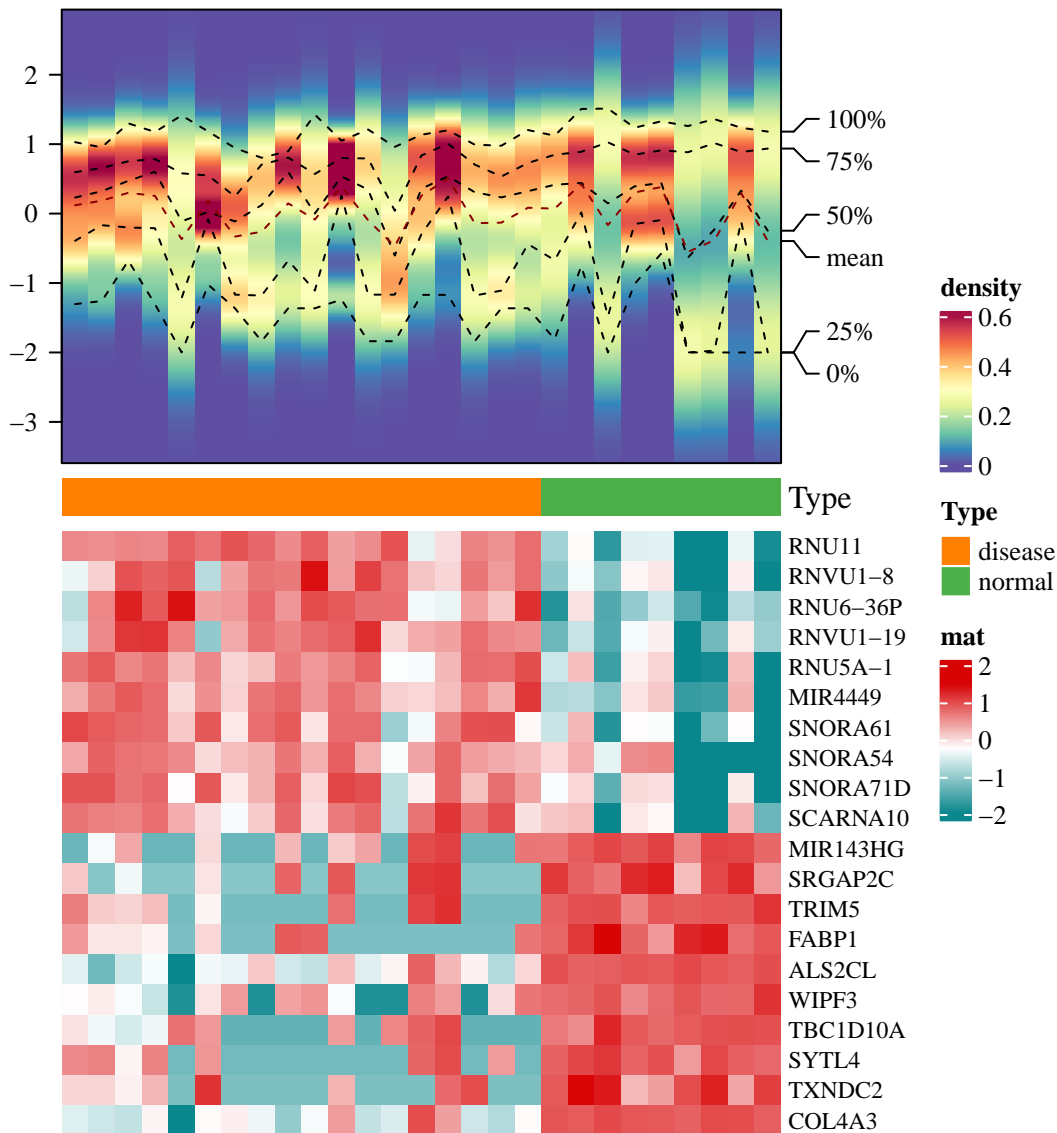

Supplement: Supplementary_raw_data.zip [file 05.GSE162830_heat.pdf › supplementary file/01_DEGs/05.GSE162830_heat.pdf]

# Distribution as heatmap

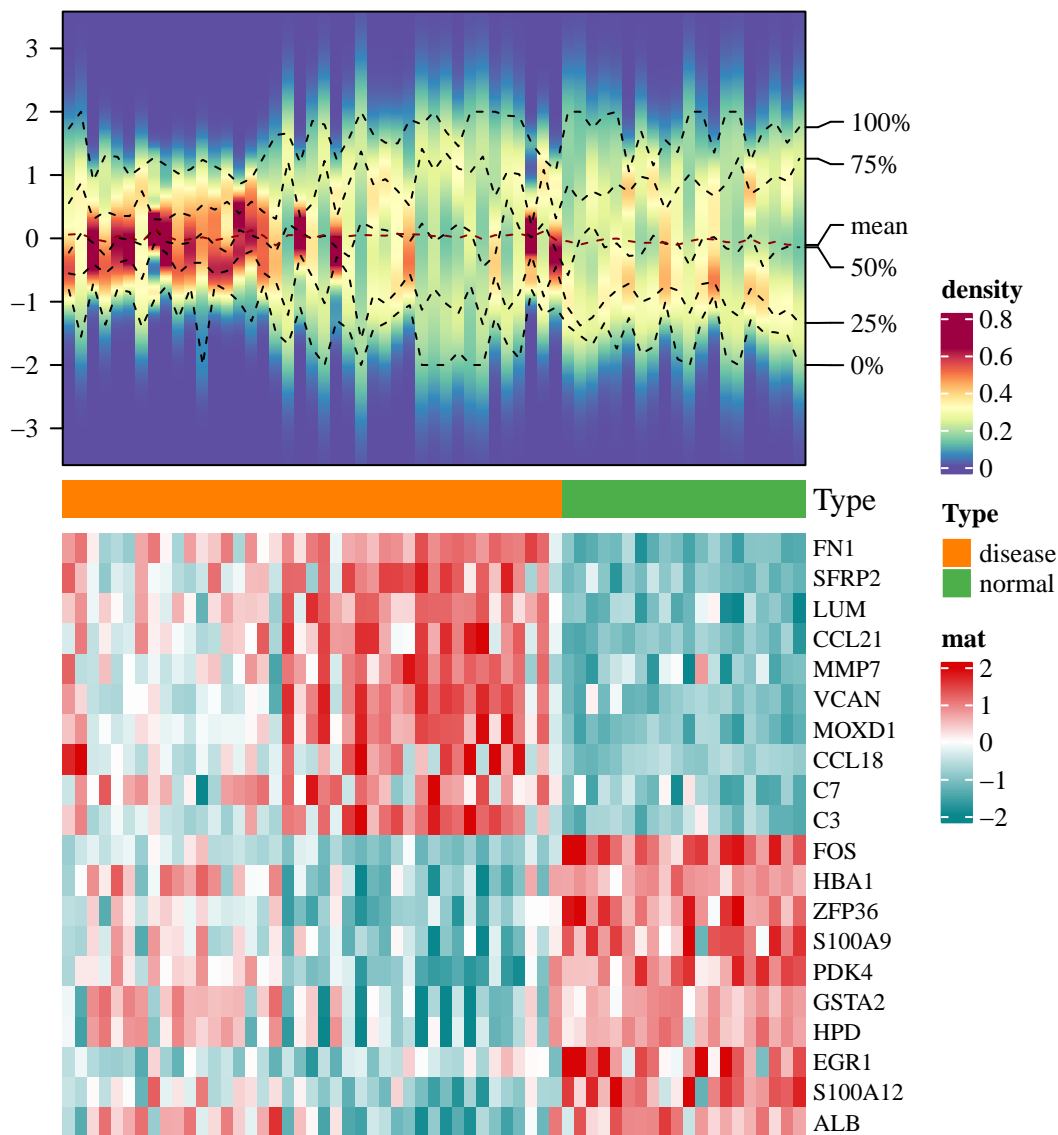

Supplement: Supplementary_raw_data.zip [file 05.GSE96804_heat.pdf › supplementary file/01_DEGs/05.GSE96804_heat.pdf]

# ssGSEA Score

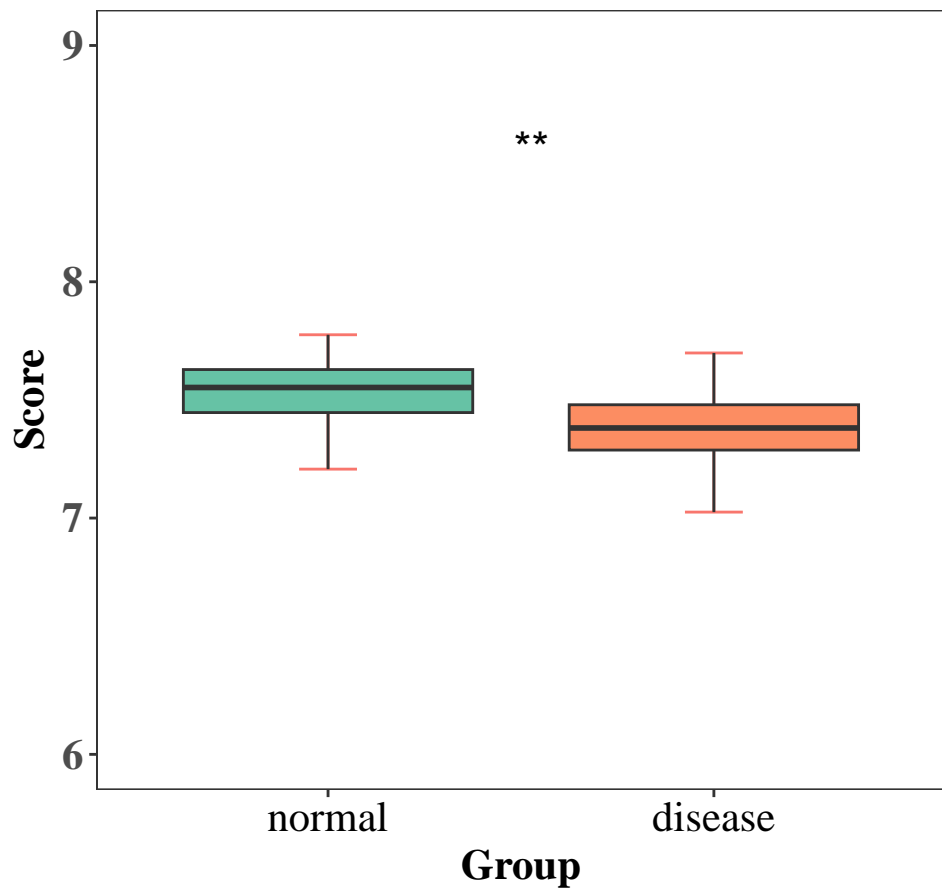

Supplement: Supplementary_raw_data.zip [file 01.ssGSEA_Score.pdf › supplementary file/02_ssGSEA_score/01.ssGSEA_Score.pdf]

# Sample Clustering

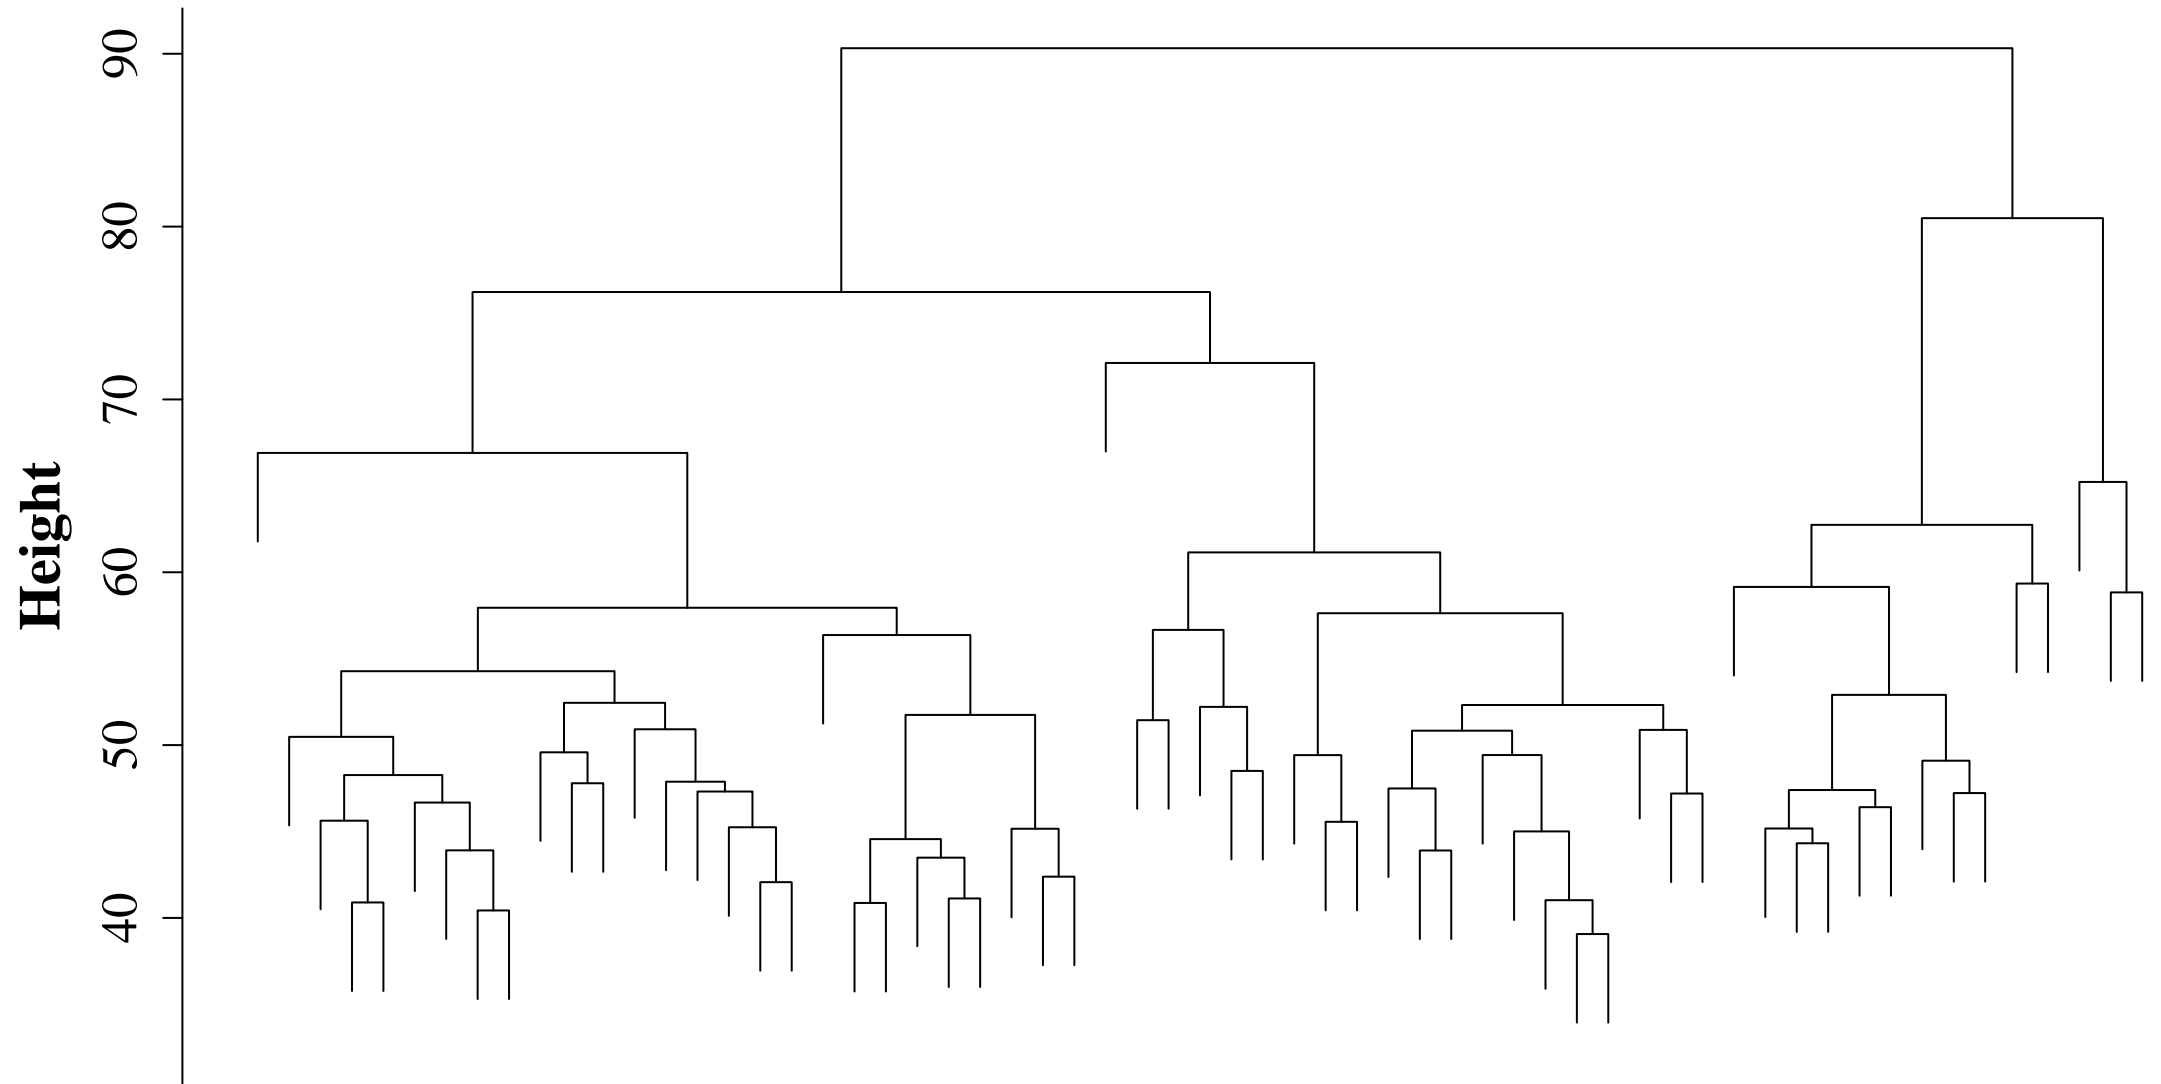

Supplement: Supplementary_raw_data.zip [file 01.sampleClustering.pdf › supplementary file/03_WGCNA/01.sampleClustering.pdf]

# Sample Clustering and trait heatmap

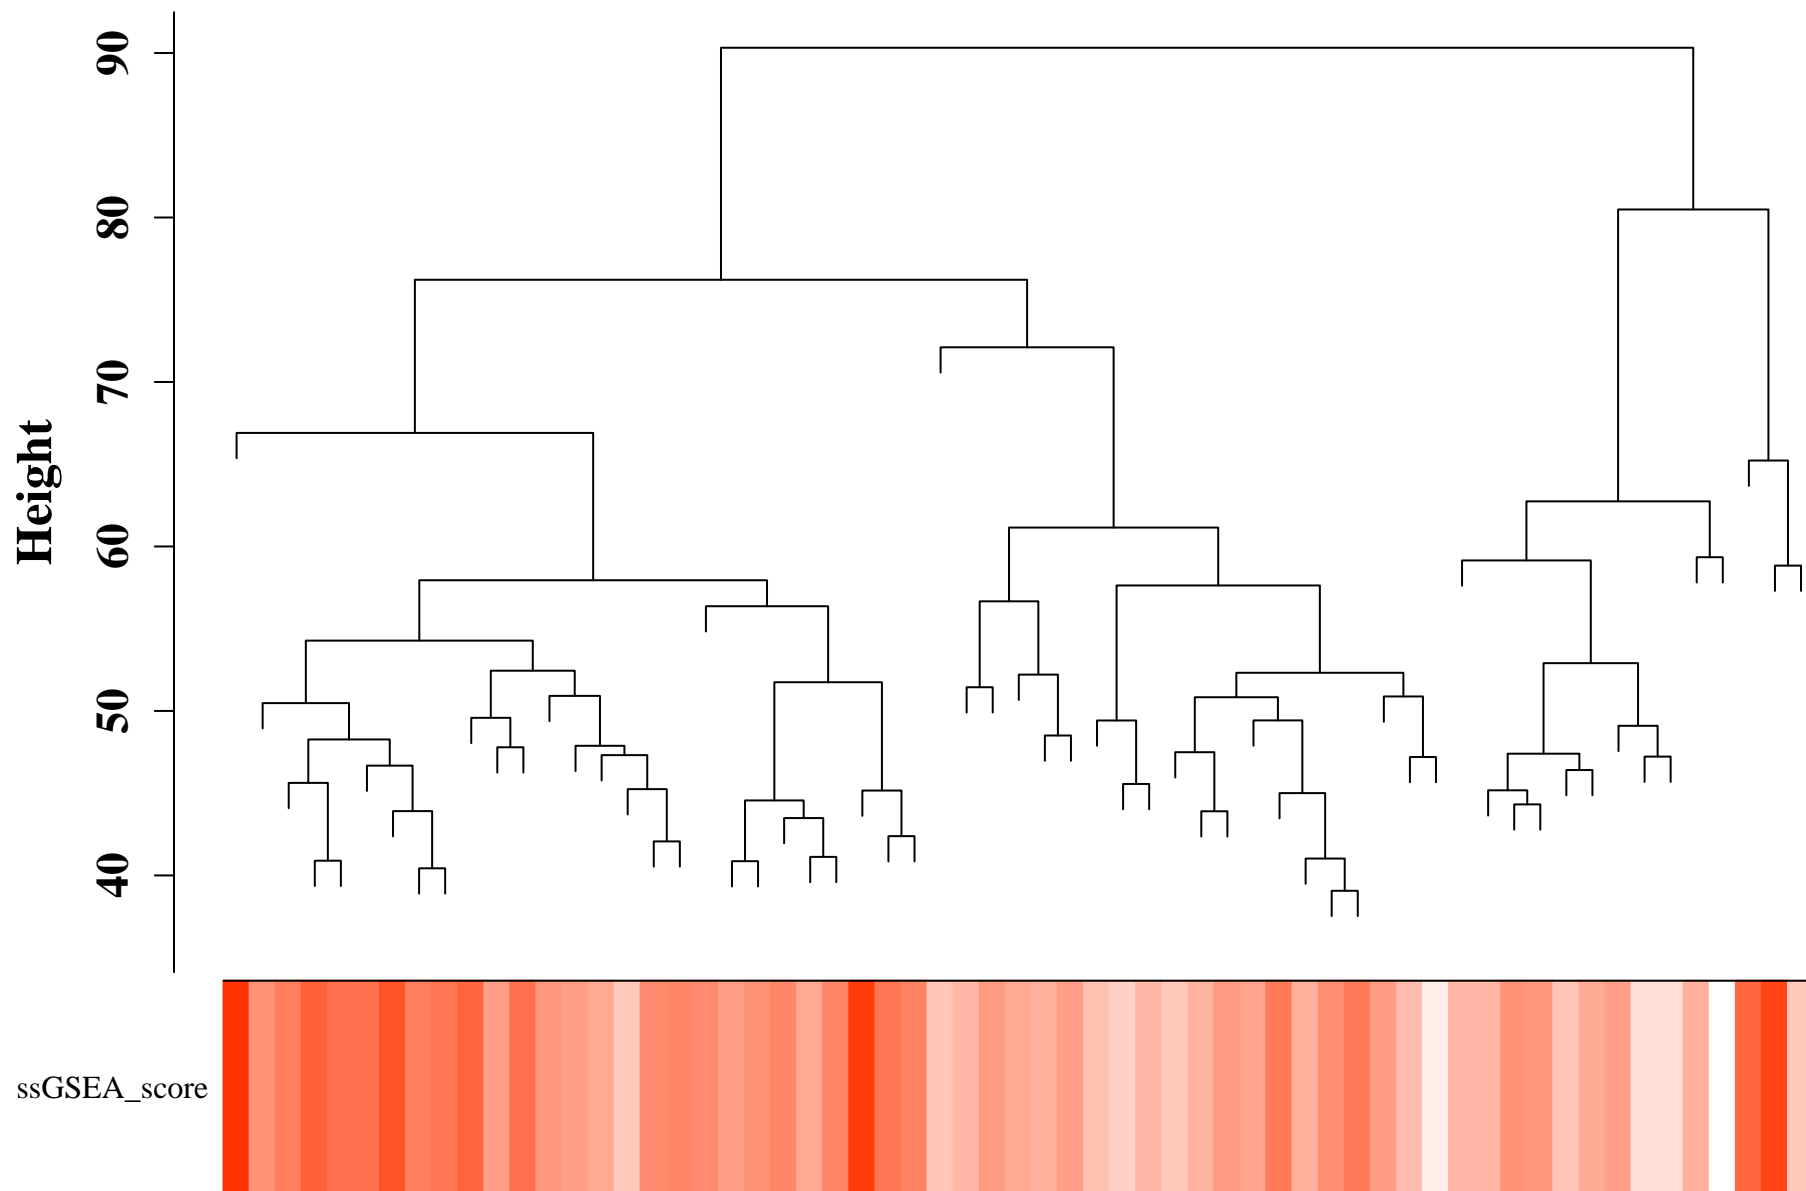

Supplement: Supplementary_raw_data.zip [file 02.sampleClustering2.pdf › supplementary file/03_WGCNA/02.sampleClustering2.pdf]

**Scale independence**

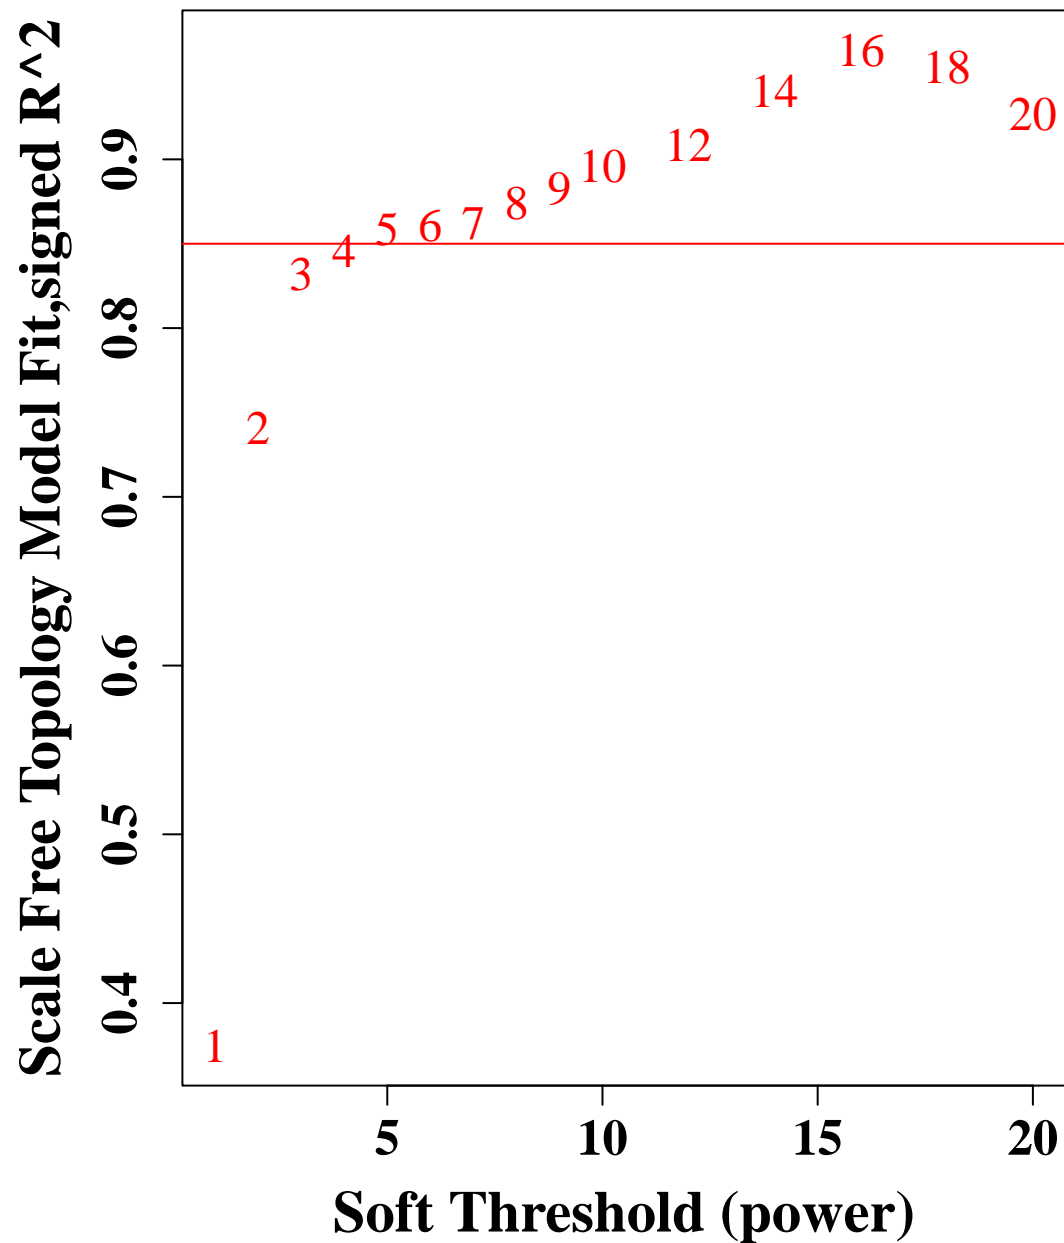

**Mean connectivity**

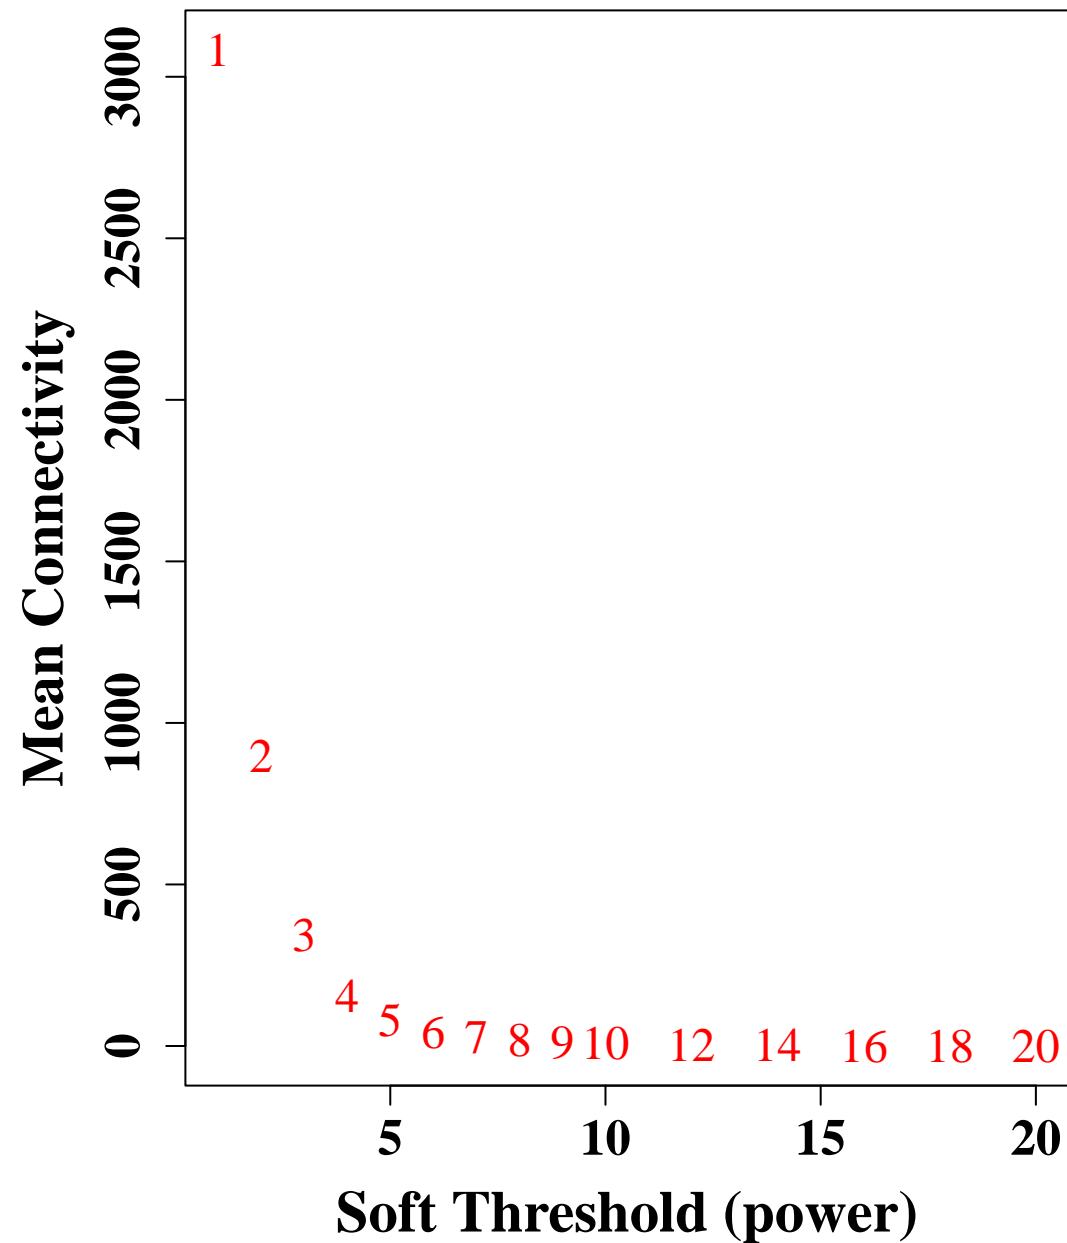

Supplement: Supplementary_raw_data.zip [file 03.softThreshold.pdf › supplementary file/03_WGCNA/03.softThreshold.pdf]

# Cluster Dendrogram

Height

0.95  
0.90  
0.85  
0.80  
0.75  
0.70  
0.65

Module colors

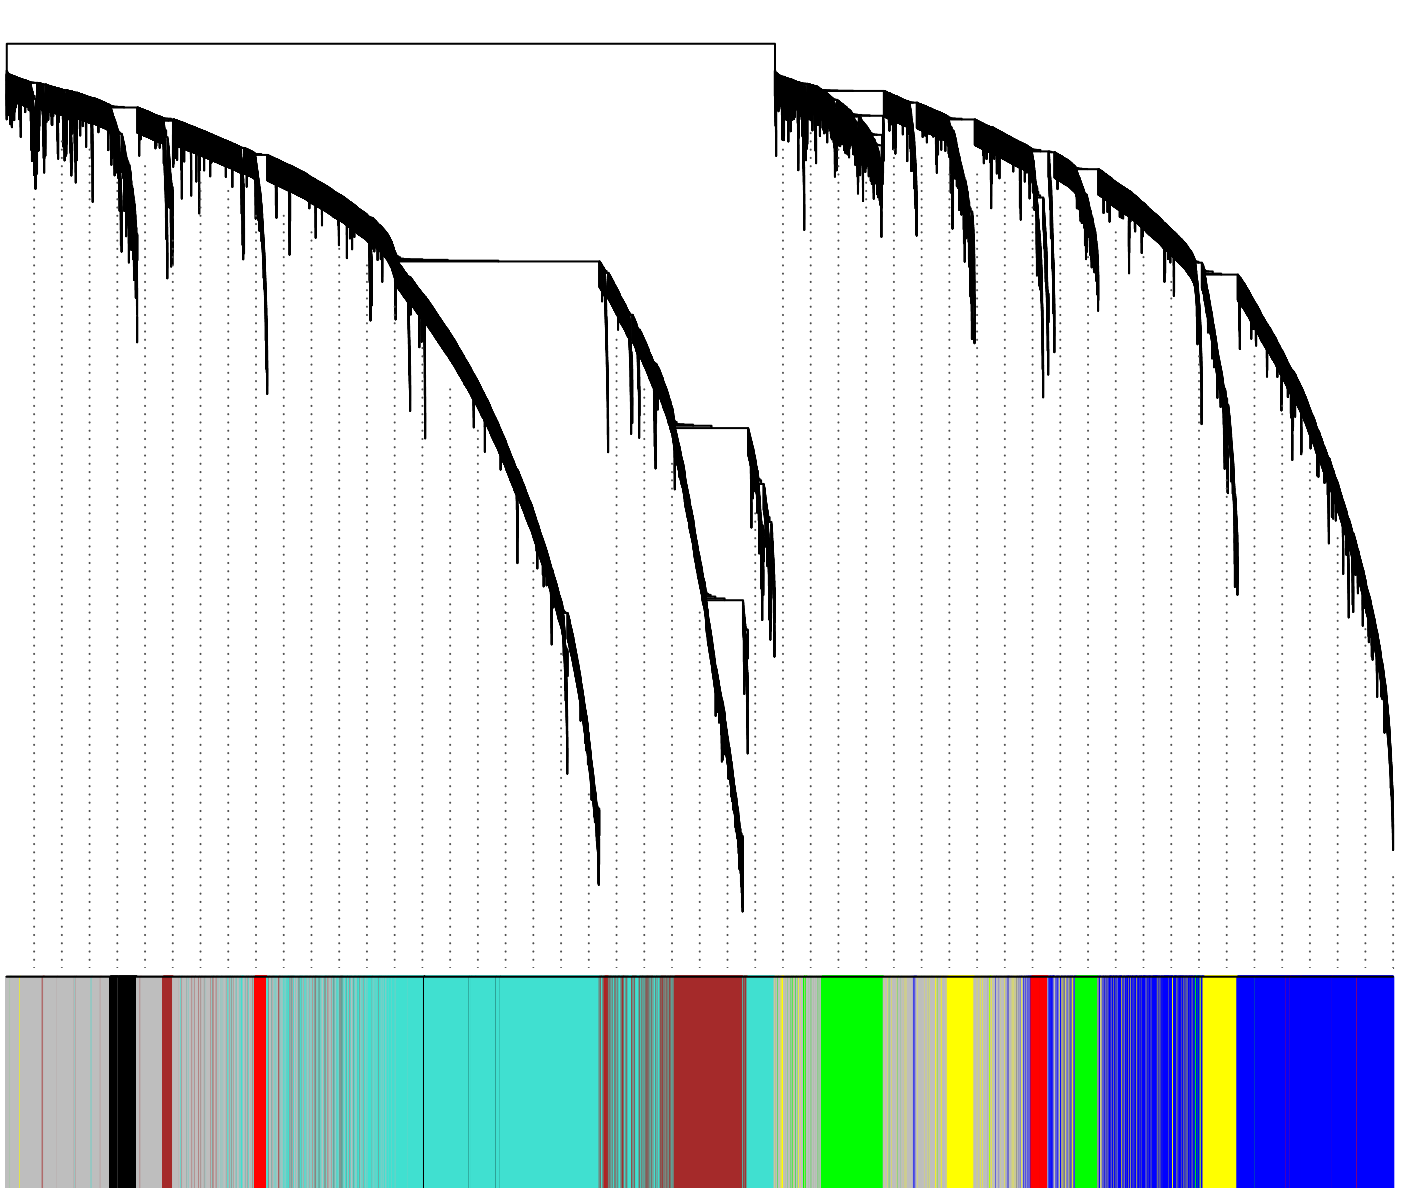

Supplement: Supplementary_raw_data.zip [file 04.wgcna.dendroColors.pdf › supplementary file/03_WGCNA/04.wgcna.dendroColors.pdf]

Module–trait relationships

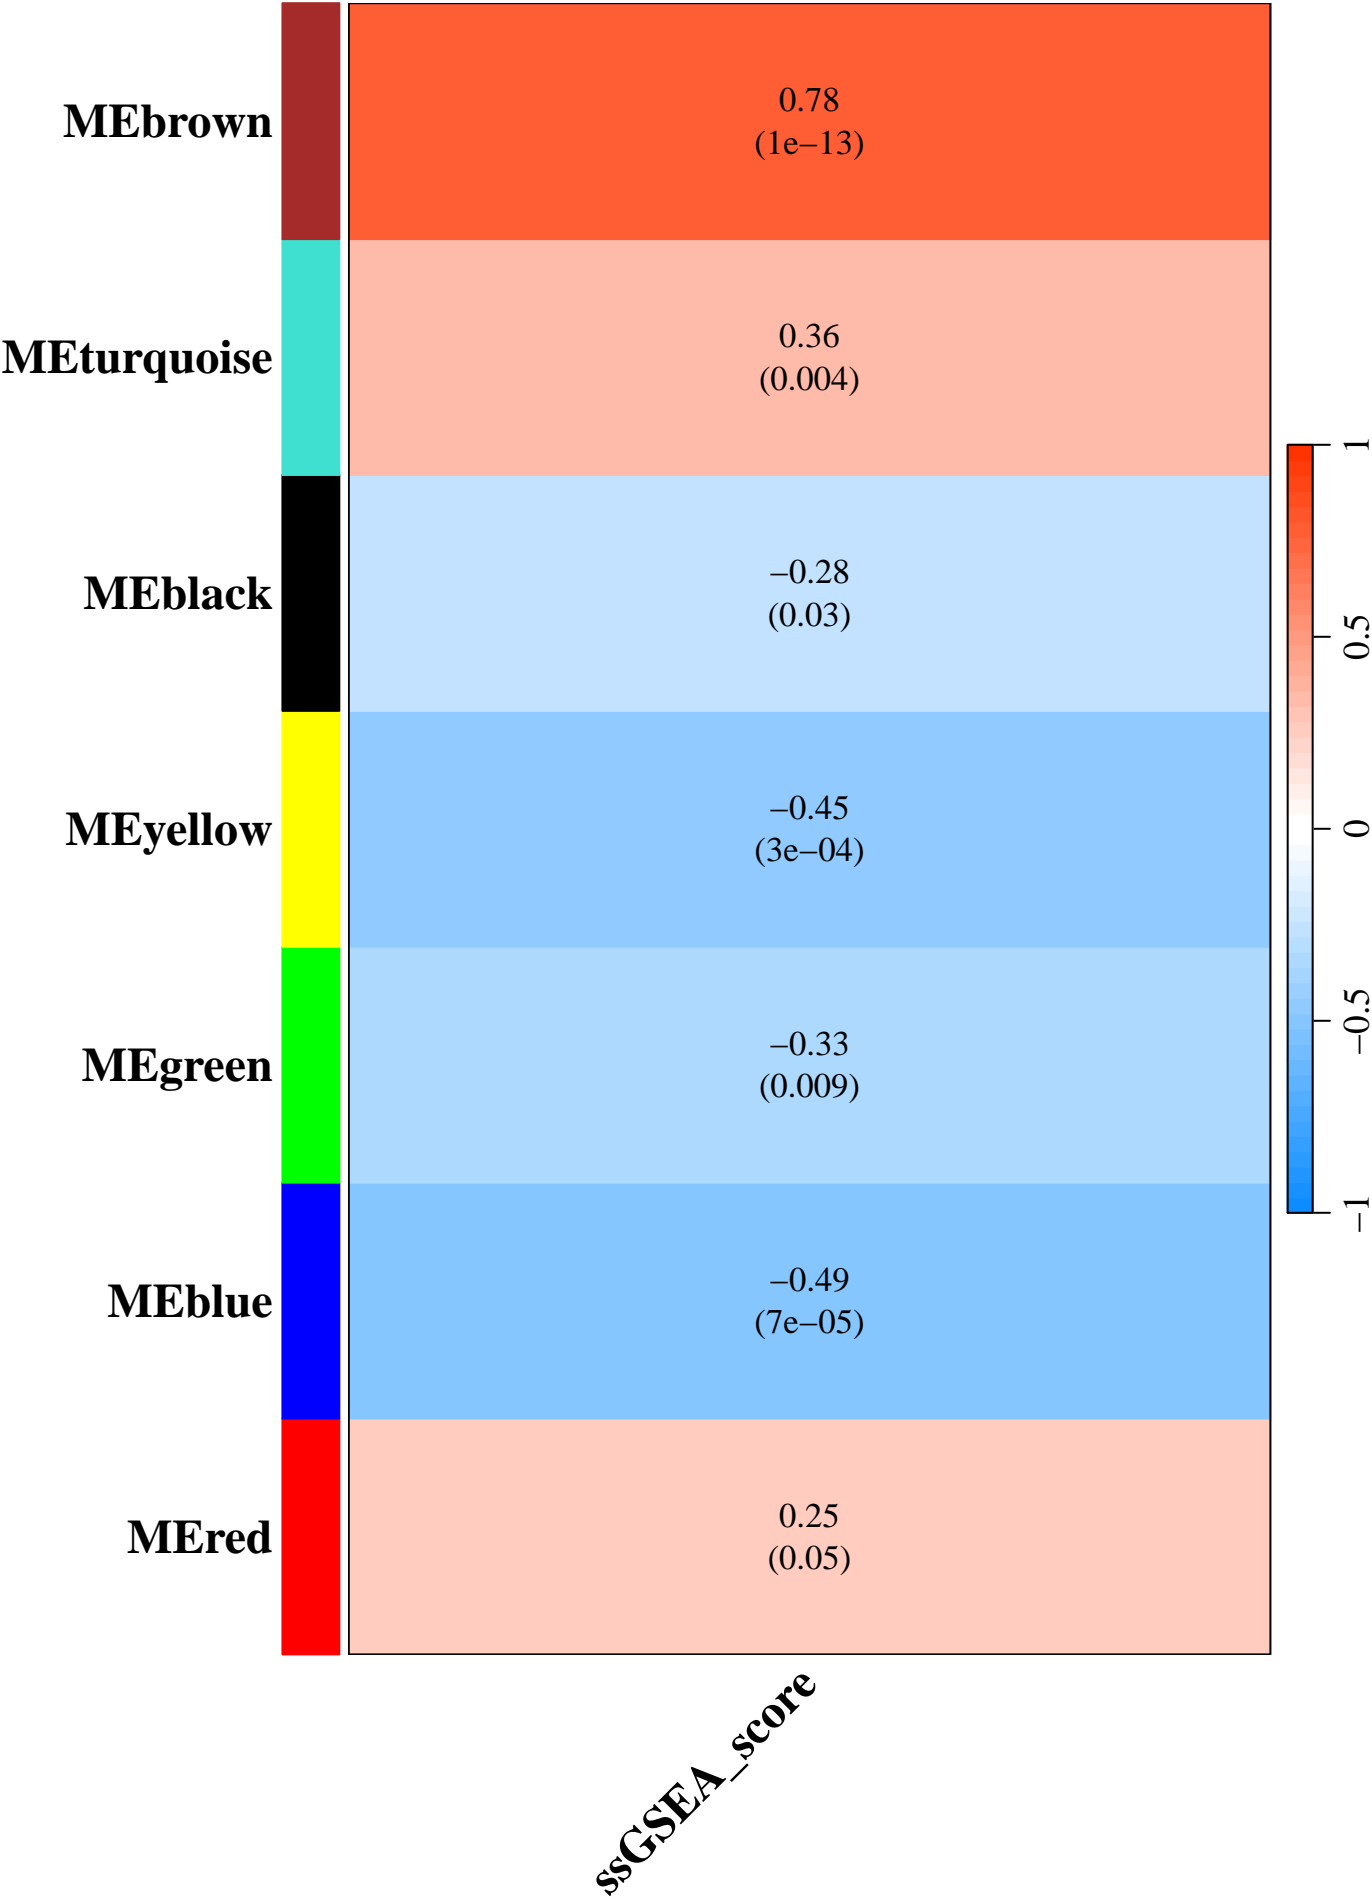

Supplement: Supplementary_raw_data.zip [file 05.wgcna.Module-trait.heatmap.pdf › supplementary file/03_WGCNA/05.wgcna.Module-trait.heatmap.pdf]

# Module membership vs. gene significance

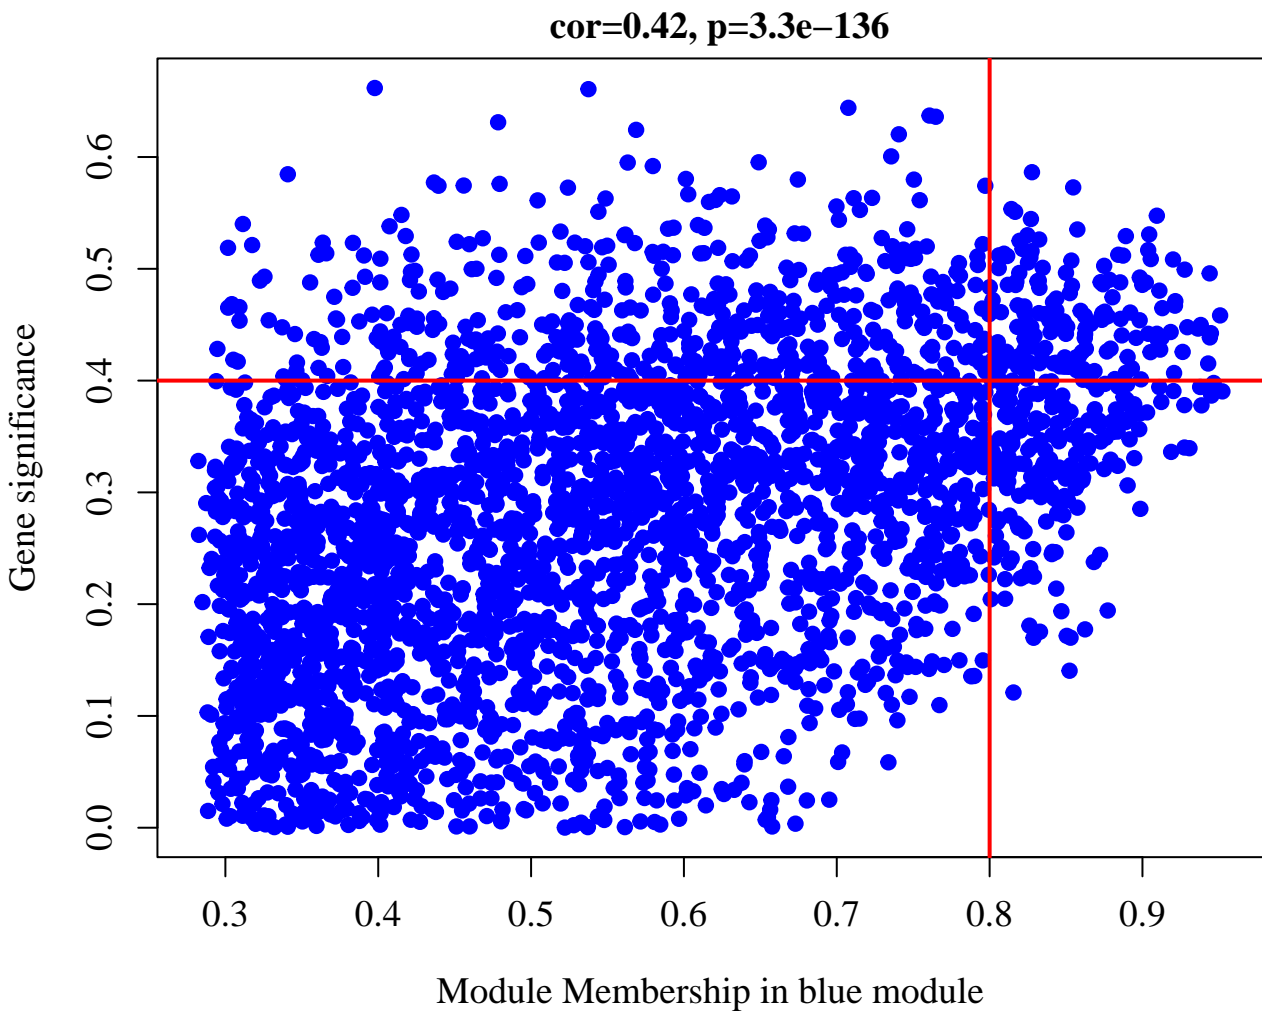

Supplement: Supplementary_raw_data.zip [file 06.GS_MM.blue.pdf › supplementary file/03_WGCNA/06.GS_MM.blue.pdf]

# Module membership vs. gene significance

$\text{cor}=0.89, p<1\text{e-}200$

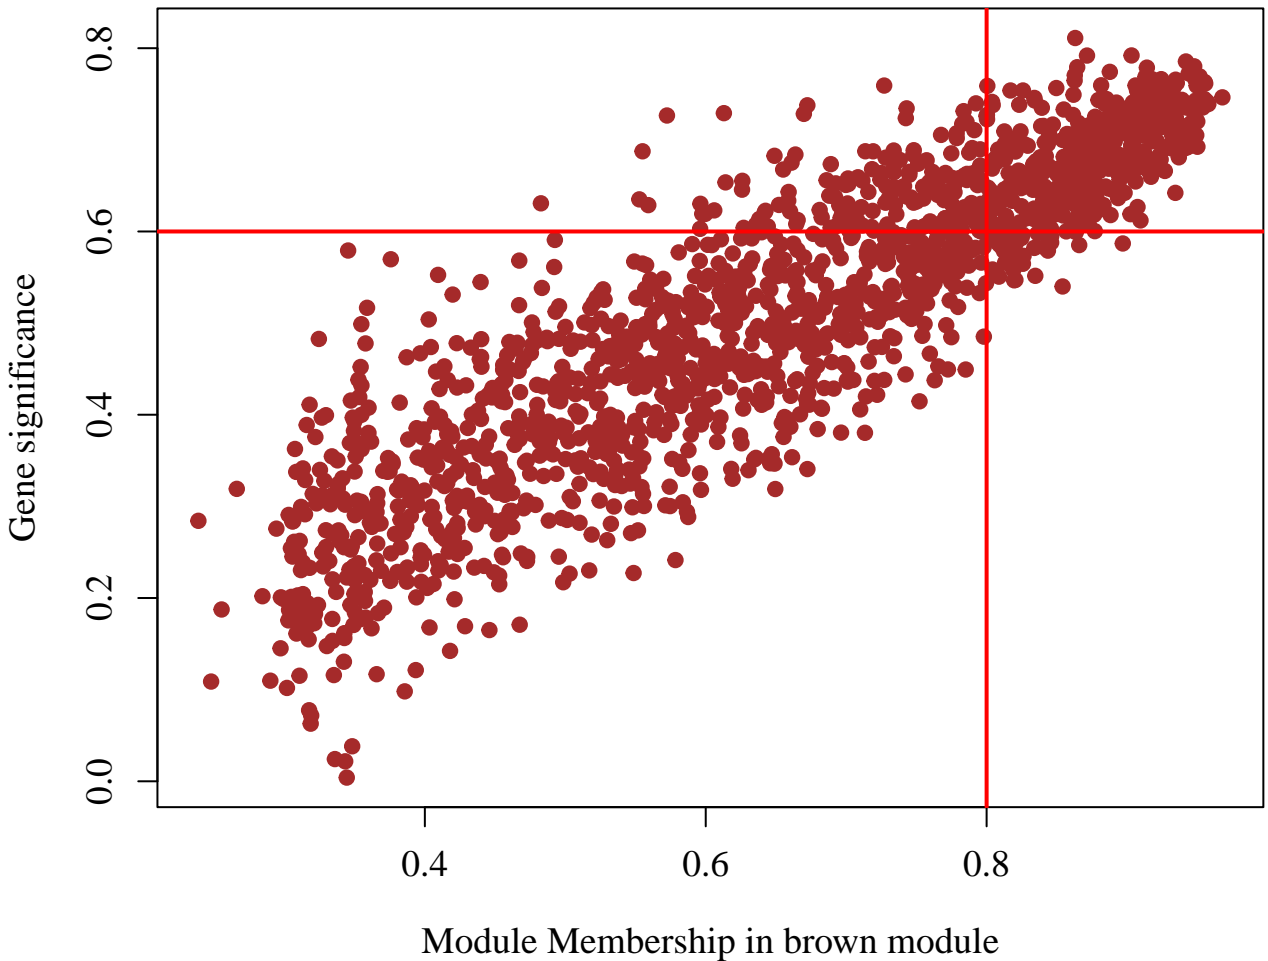

Supplement: Supplementary_raw_data.zip [file 06.GS_MM.brown.pdf › supplementary file/03_WGCNA/06.GS_MM.brown.pdf]

# Module membership vs. gene significance

**cor=0.44, p=1.1e-56**

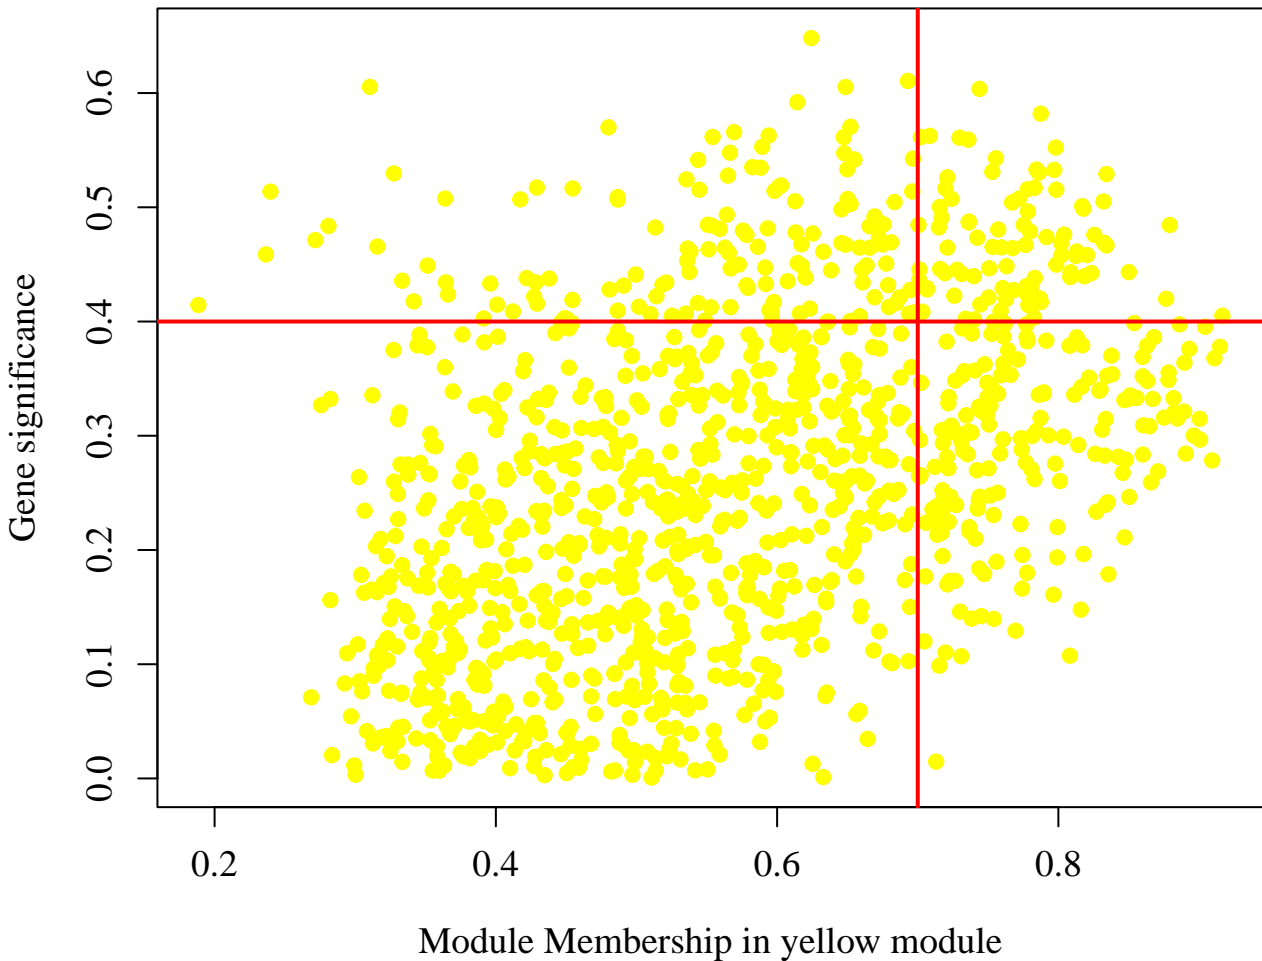

Supplement: Supplementary_raw_data.zip [file 06.GS_MM.yellow.pdf › supplementary file/03_WGCNA/06.GS_MM.yellow.pdf]

DEGs

MEs\_blue

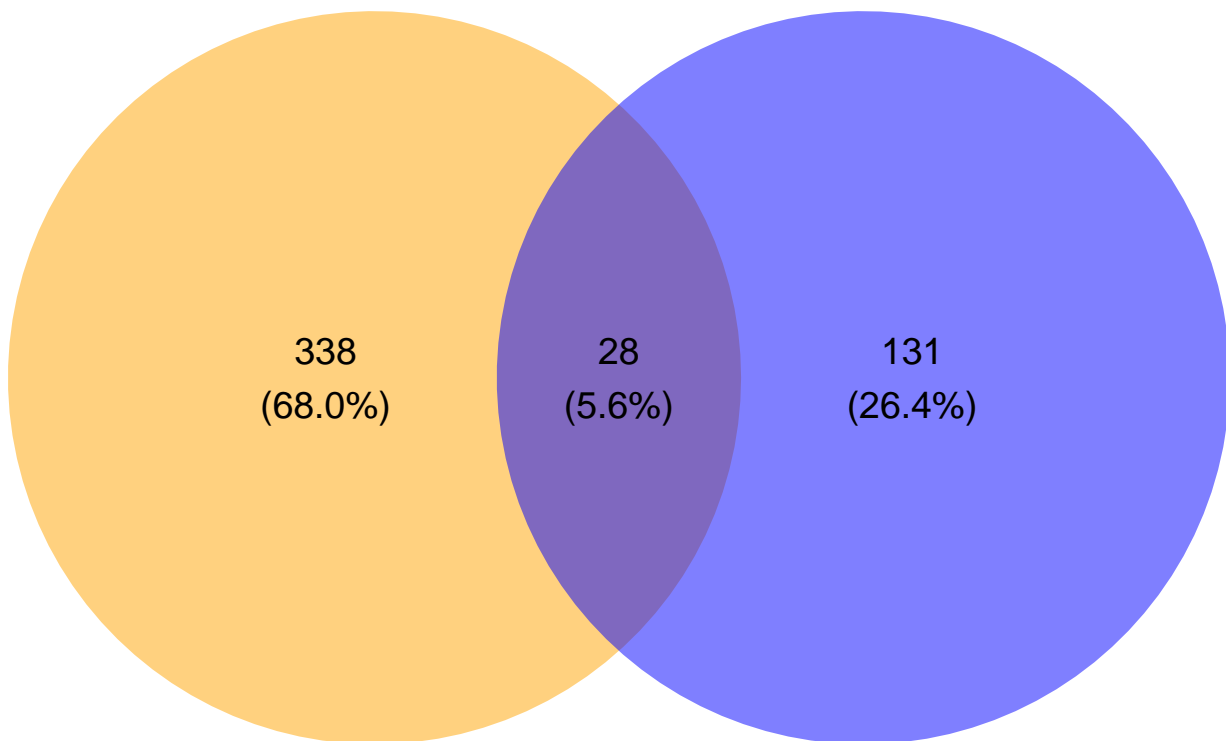

Supplement: Supplementary_raw_data.zip [file 01.Veen_blue.pdf › supplementary file/04_venn/01.Veen_blue.pdf]

DEGs

MEs\_brown

242  
(38.3%)

124  
(19.6%)

266  
(42.1%)

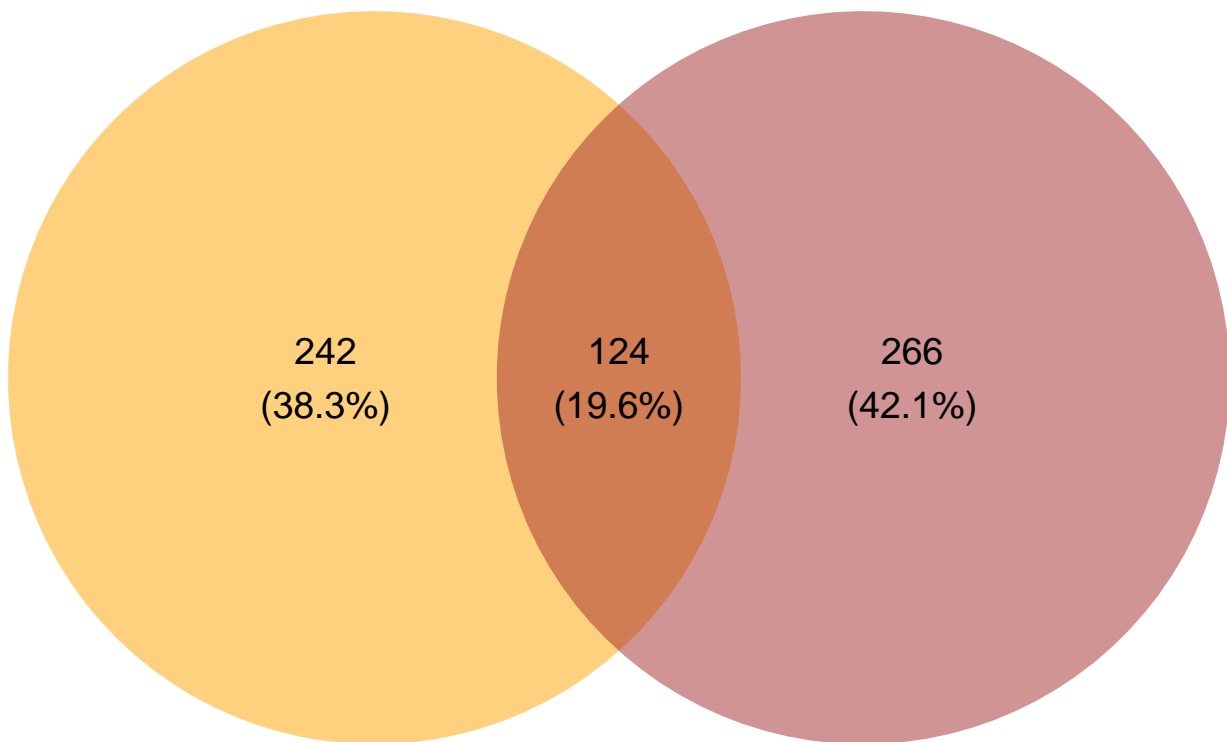

Supplement: Supplementary_raw_data.zip [file 01.Veen_brown.pdf › supplementary file/04_venn/01.Veen_brown.pdf]

lasso

xgboost

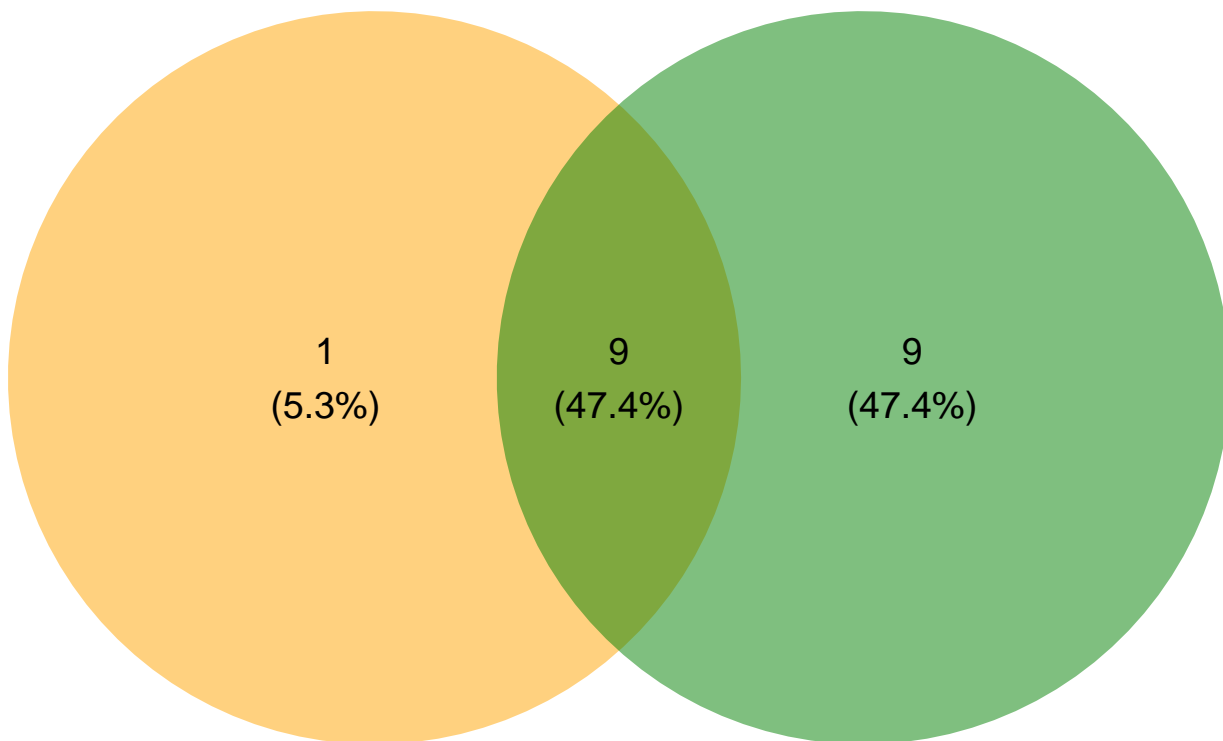

Supplement: Supplementary_raw_data.zip [file blue_hub2.pdf › supplementary file/05_Machine_learning/blue_hub2.pdf]

lasso

xgboost

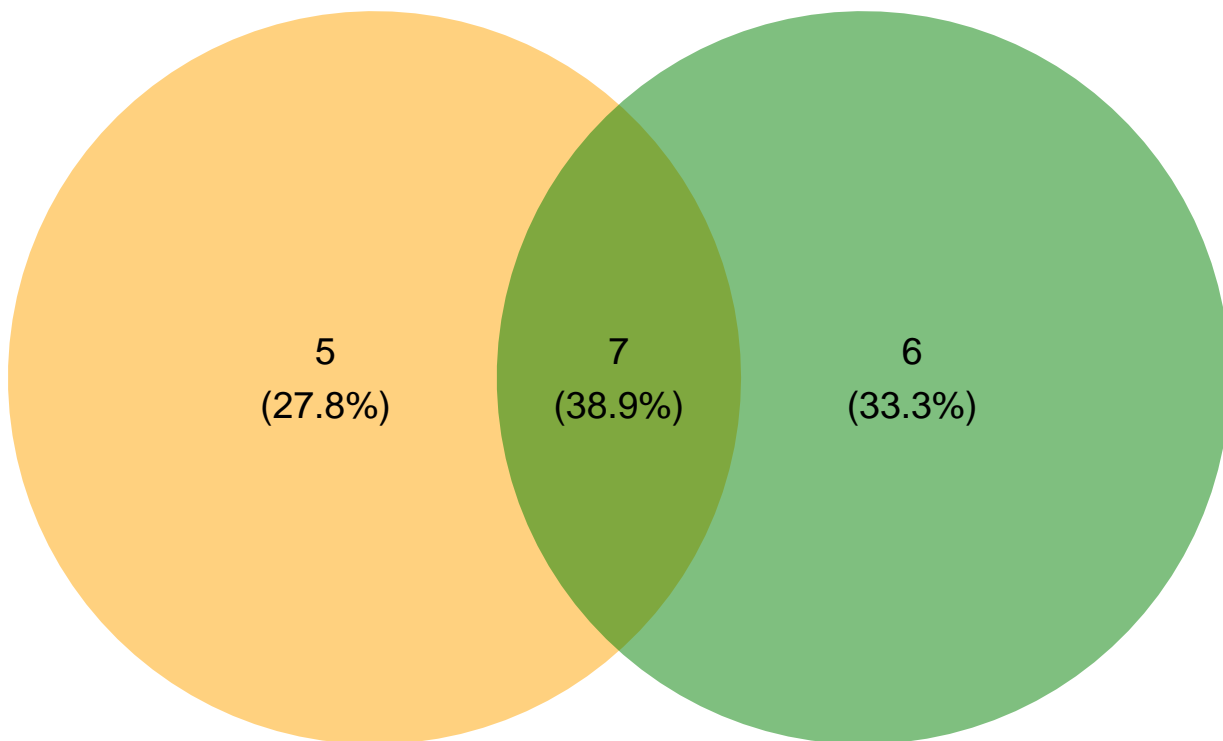

Supplement: Supplementary_raw_data.zip [file brown_hub2.pdf › supplementary file/05_Machine_learning/brown_hub2.pdf]

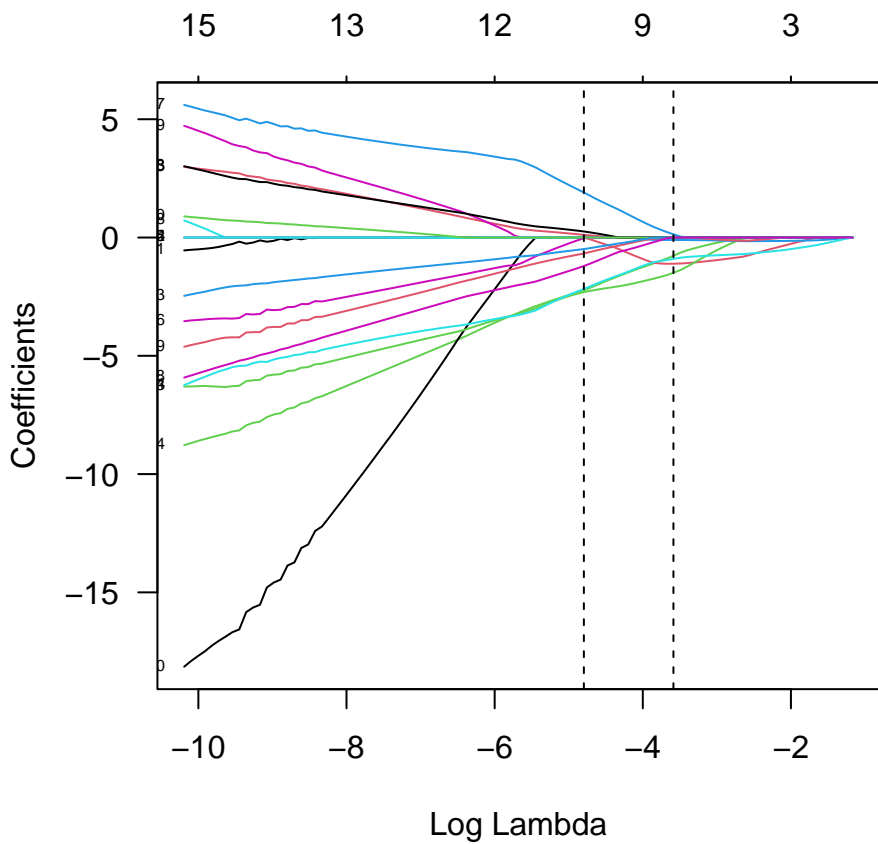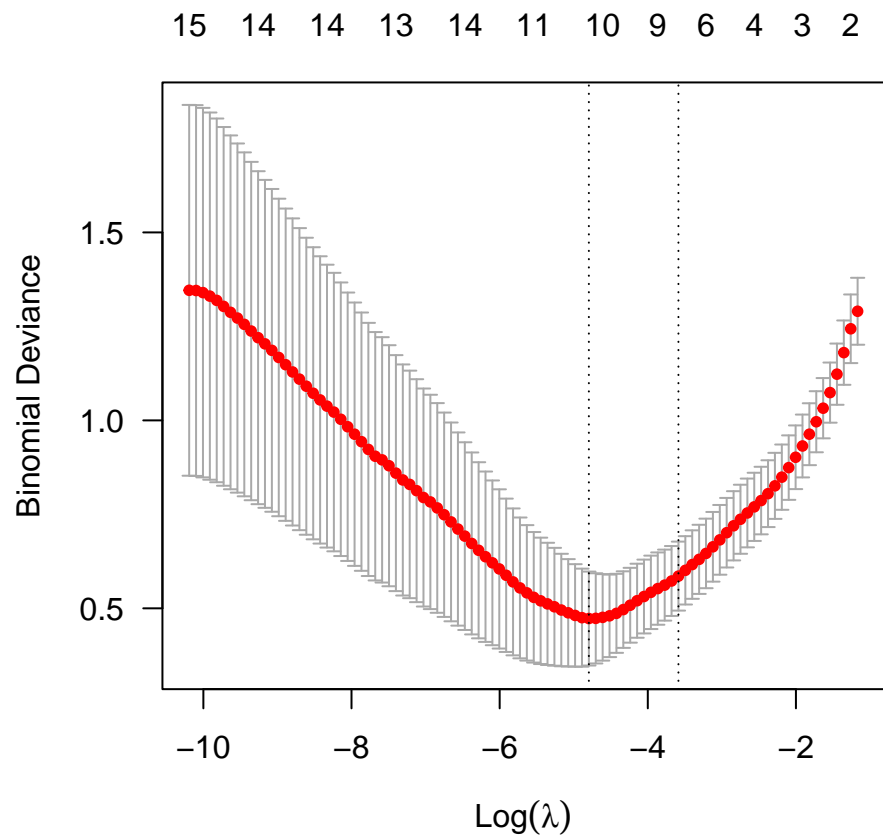

Supplement: Supplementary_raw_data.zip [file 01.blue_lasso_model.pdf › supplementary file/05_Machine_learning/lasso/blue/01.blue_lasso_model.pdf]

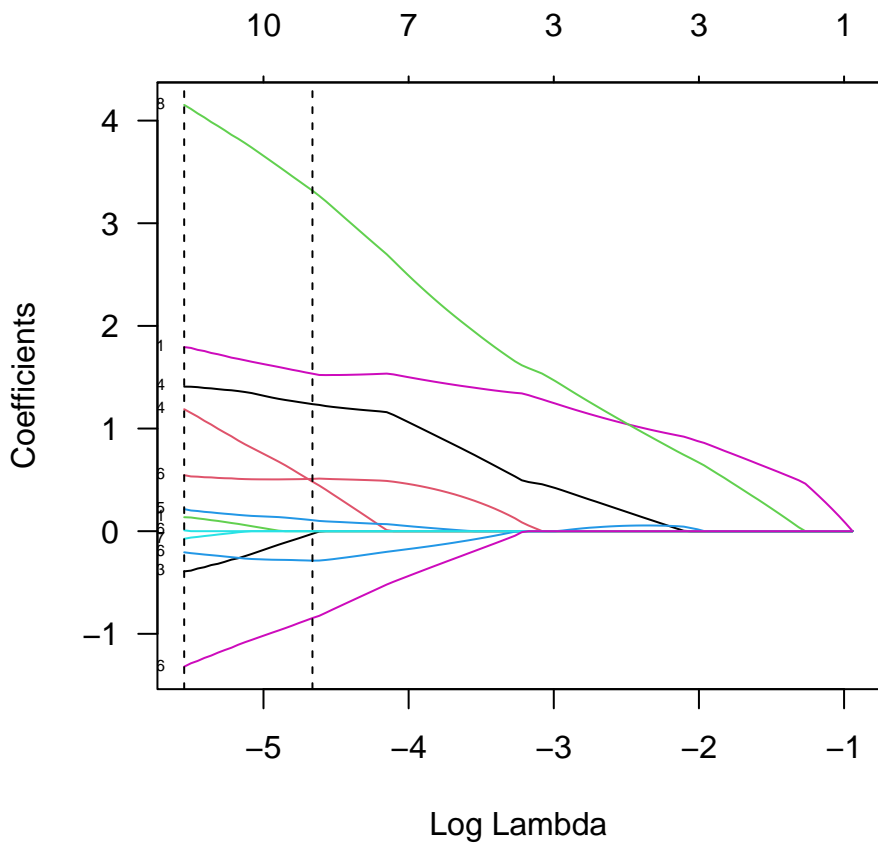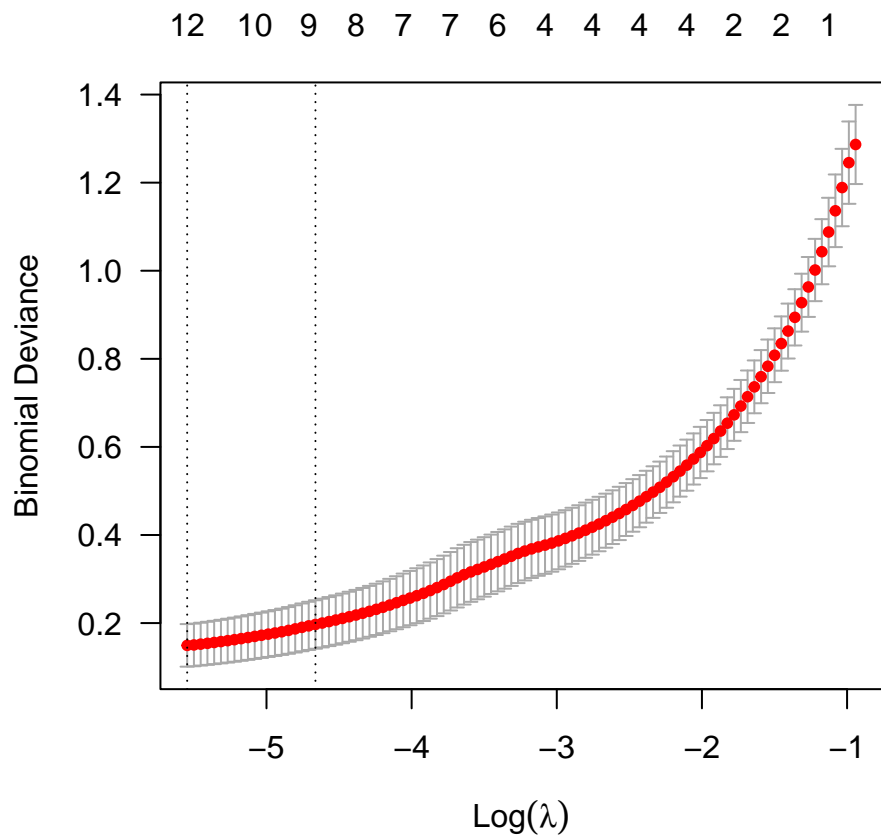

Supplement: Supplementary_raw_data.zip [file 01.brown_lasso_model.pdf › supplementary file/05_Machine_learning/lasso/brown/01.brown_lasso_model.pdf]

# XGBoost

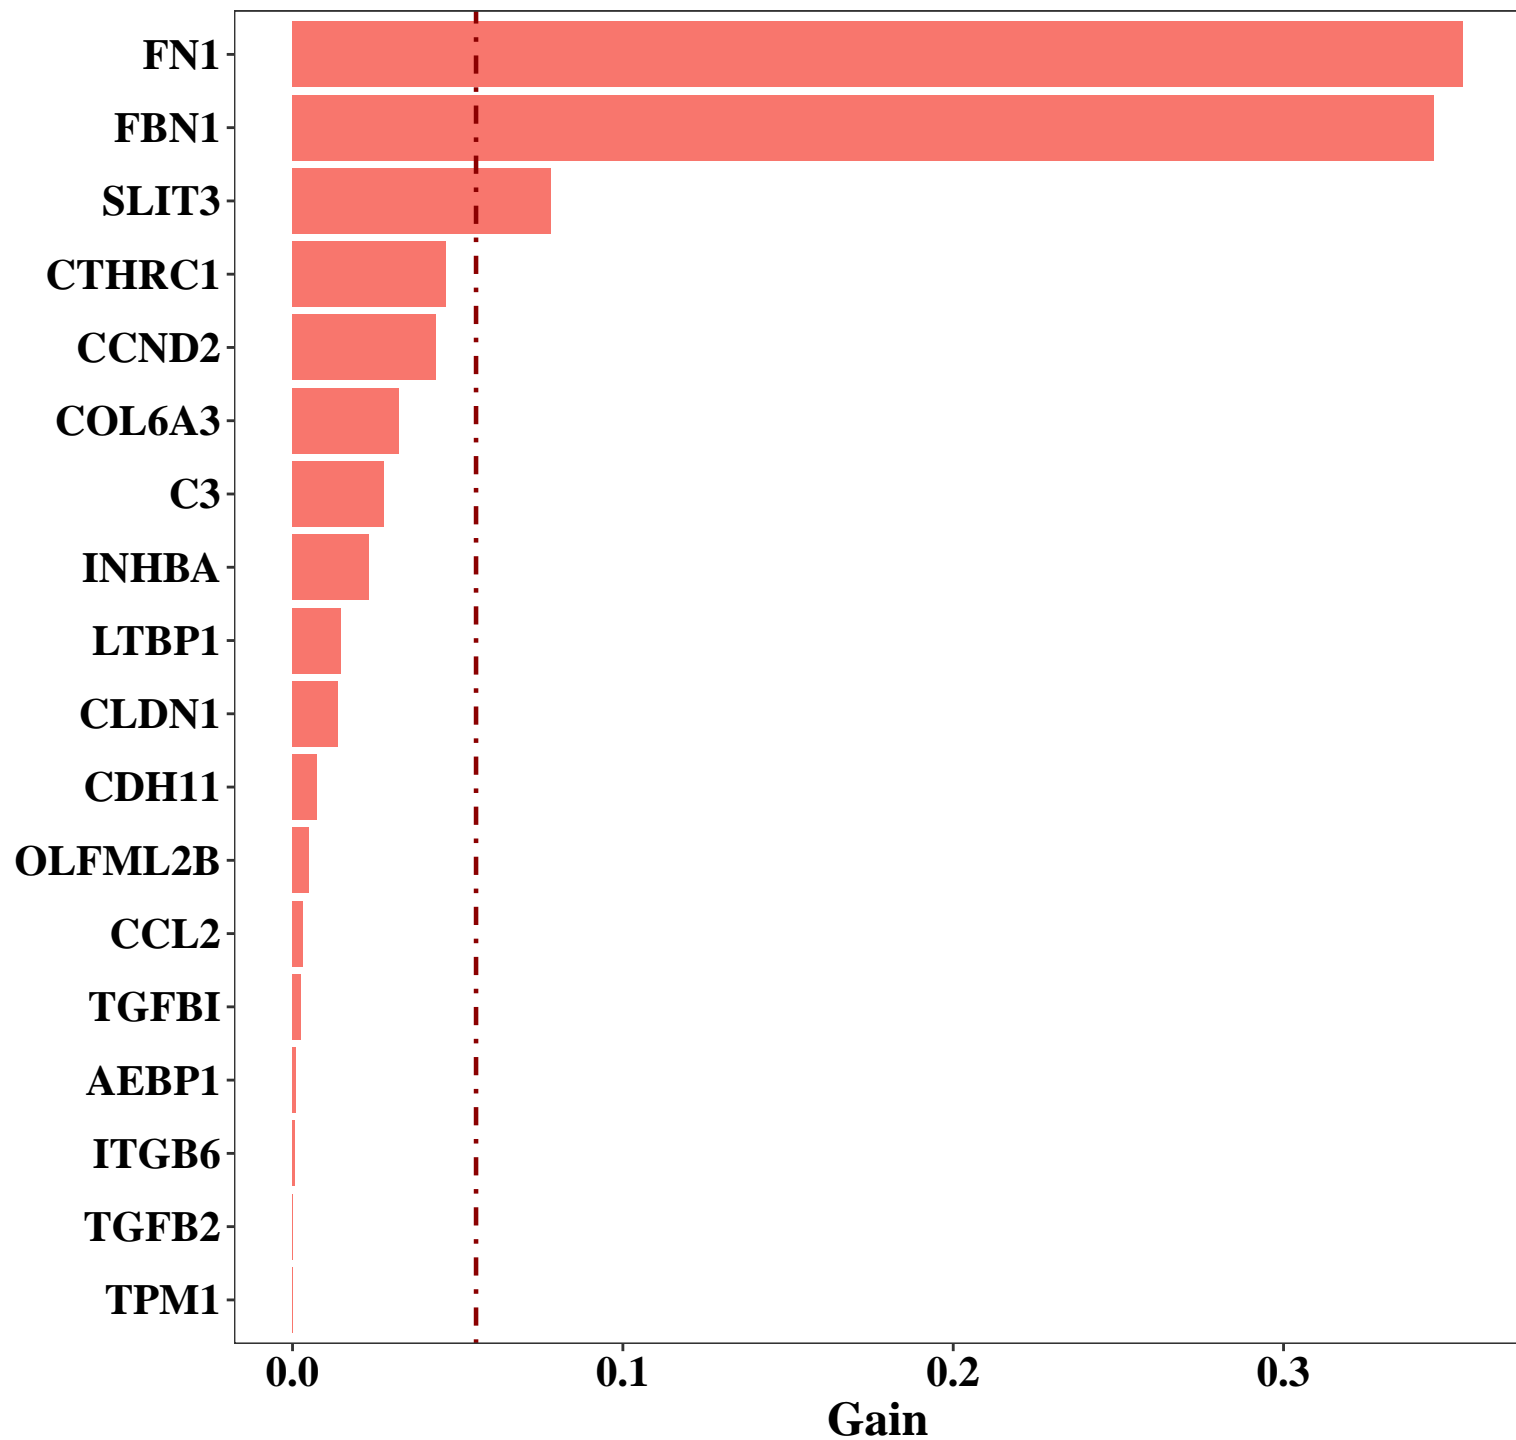

Supplement: Supplementary_raw_data.zip [file blue_XGBoost_importance.pdf › supplementary file/05_Machine_learning/xgboost/blue/blue_XGBoost_importance.pdf]

# XGBoost

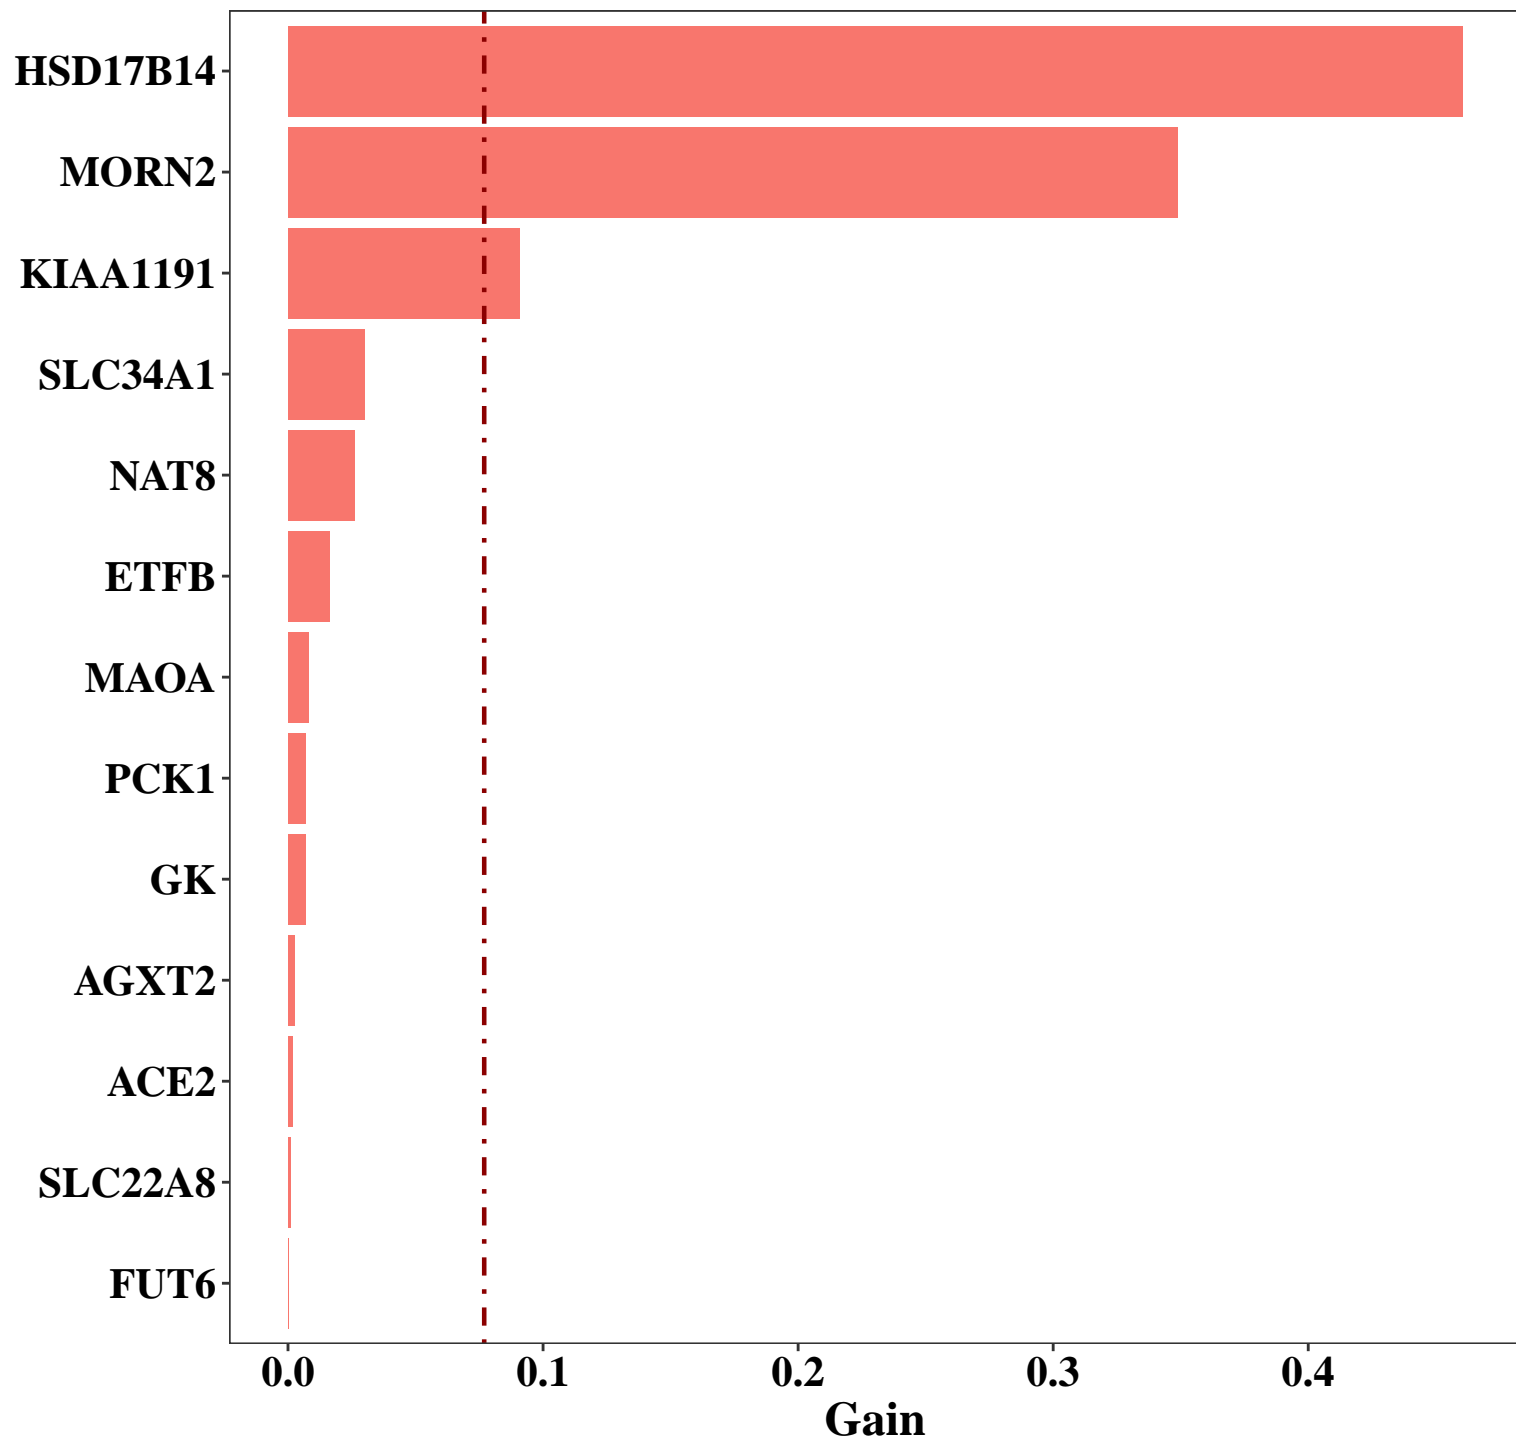

Supplement: Supplementary_raw_data.zip [file brown_XGBoost_importance.pdf › supplementary file/05_Machine_learning/xgboost/brown/brown_XGBoost_importance.pdf]

Train\_Expression of hub\_gene

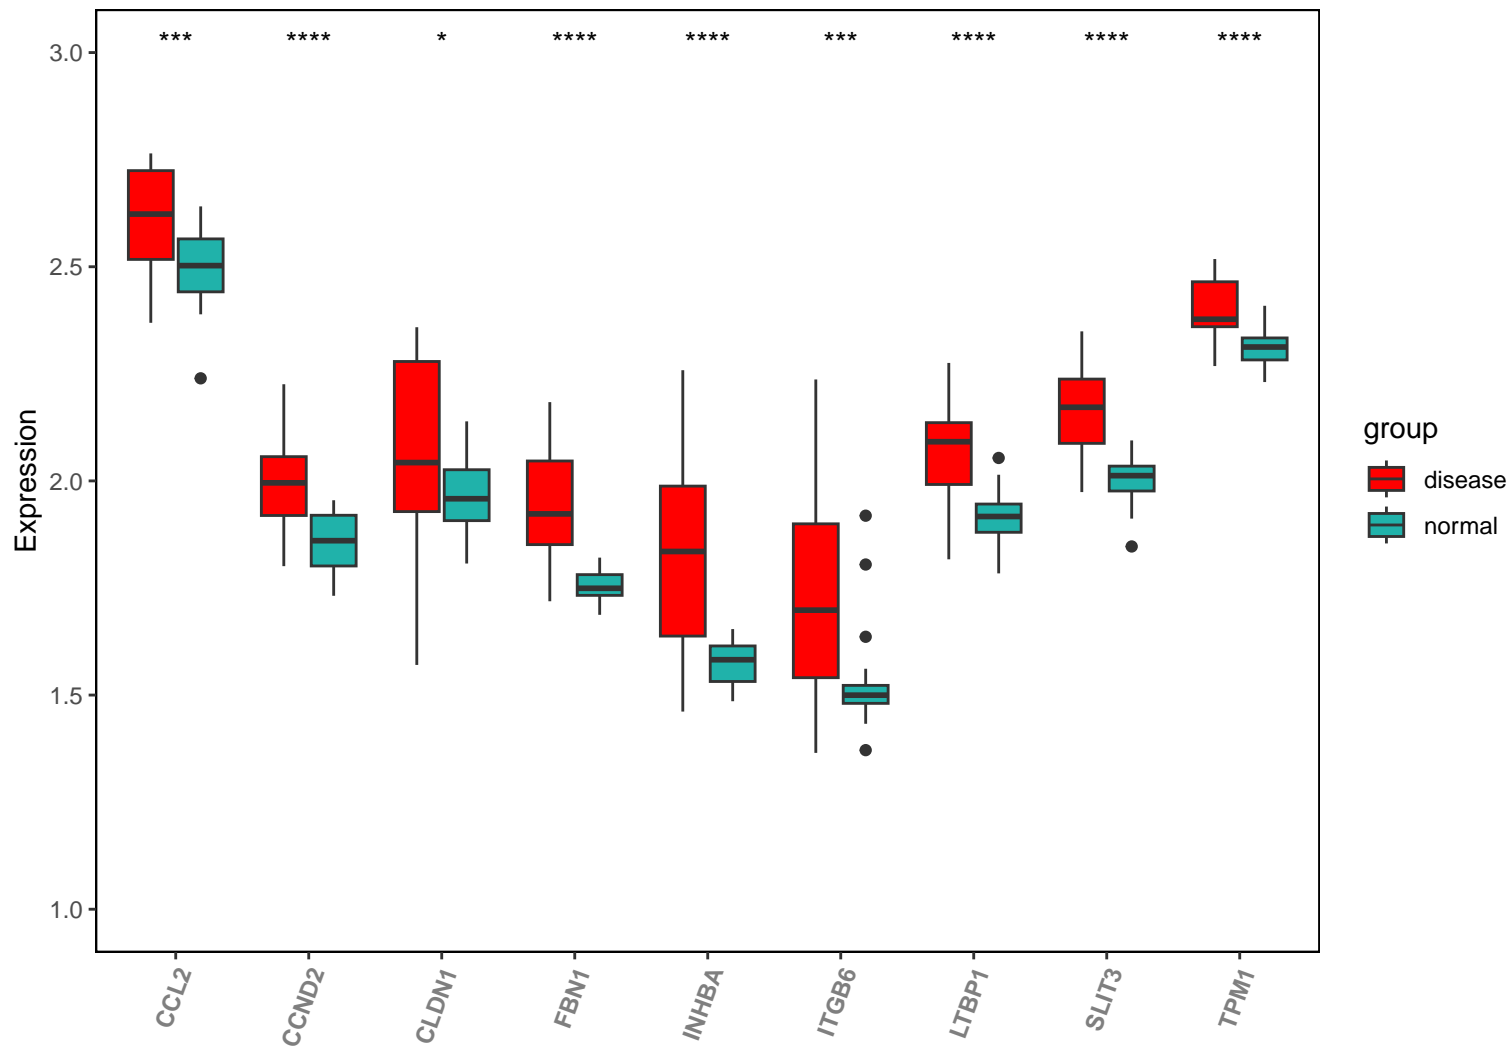

Supplement: Supplementary_raw_data.zip [file 01.blue_hub_gene_Expression_train.pdf › supplementary file/06_expression/blue/01.blue_hub_gene_Expression_train.pdf]

test\_Expression of hub\_gene

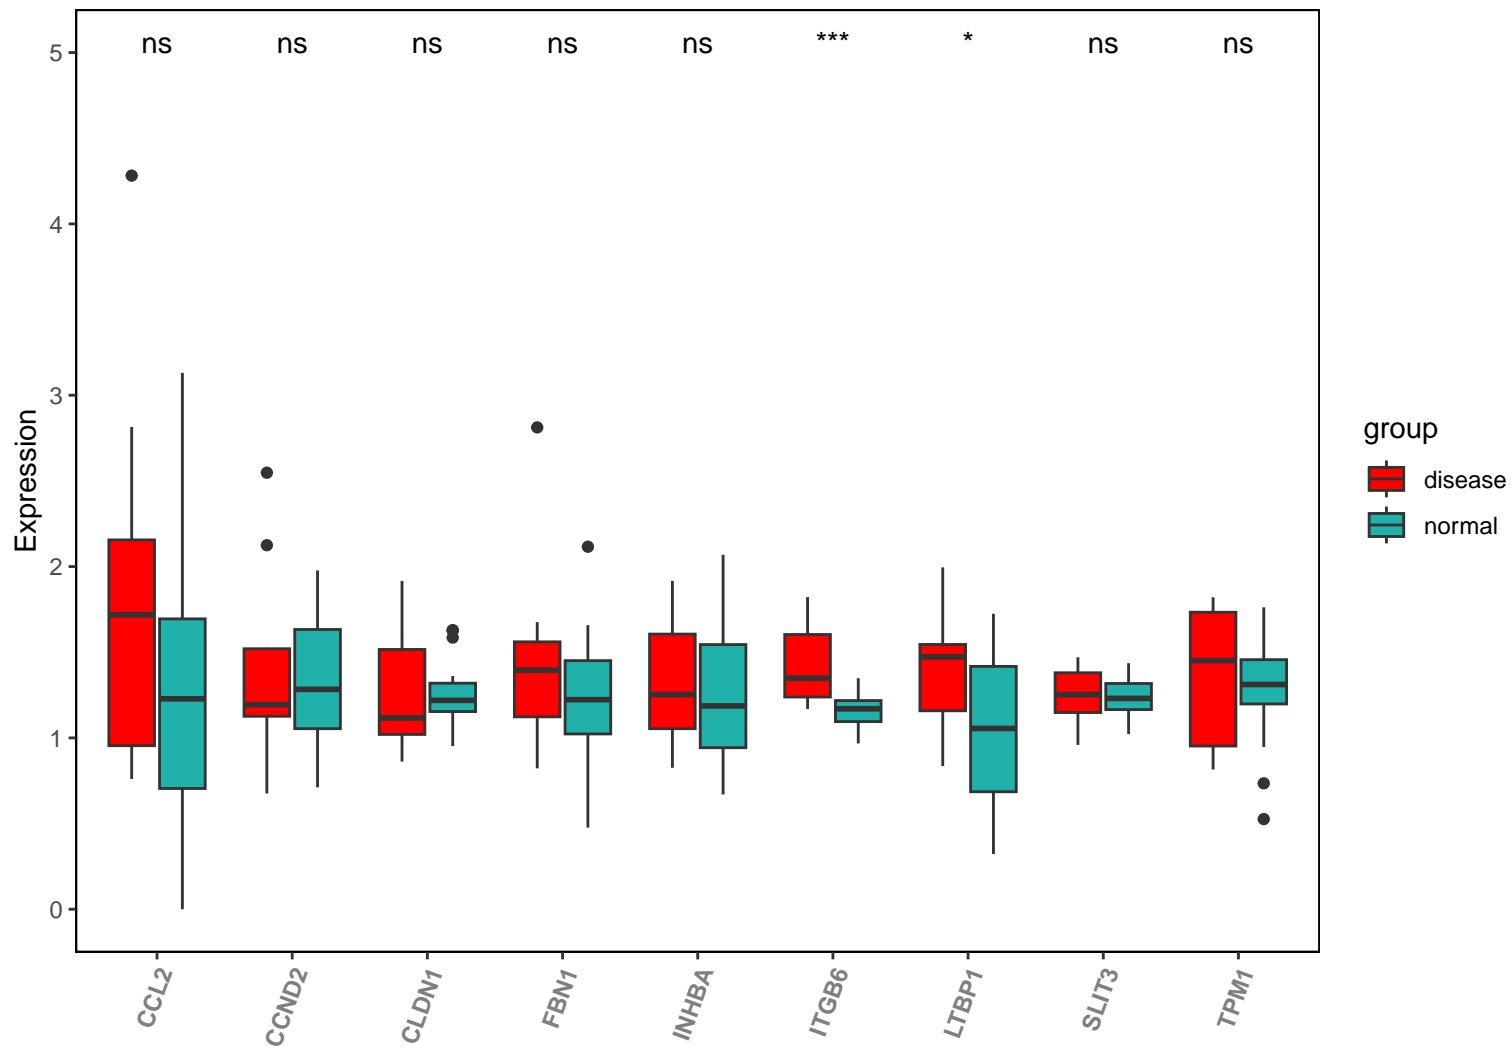

Supplement: Supplementary_raw_data.zip [file 02.blue_hub_gene_Expression_test.pdf › supplementary file/06_expression/blue/02.blue_hub_gene_Expression_test.pdf]

Train\_Expression of hub\_gene

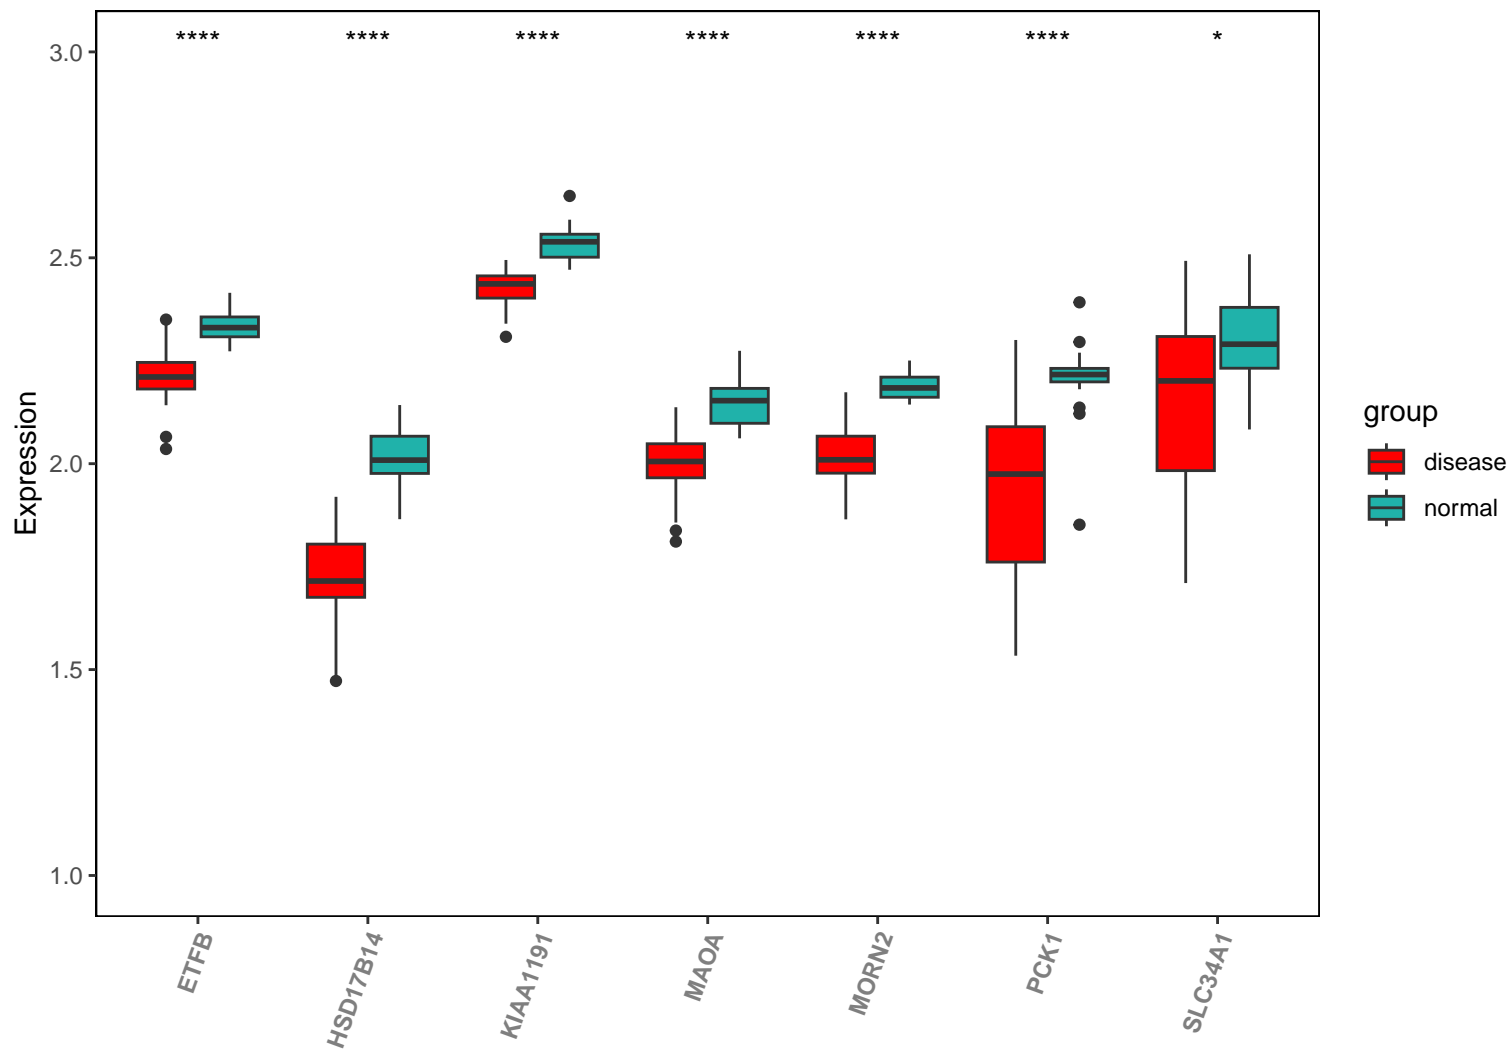

Supplement: Supplementary_raw_data.zip [file 01.brown_hub_gene_Expression_train.pdf › supplementary file/06_expression/brown/01.brown_hub_gene_Expression_train.pdf]

test\_Expression of hub\_gene

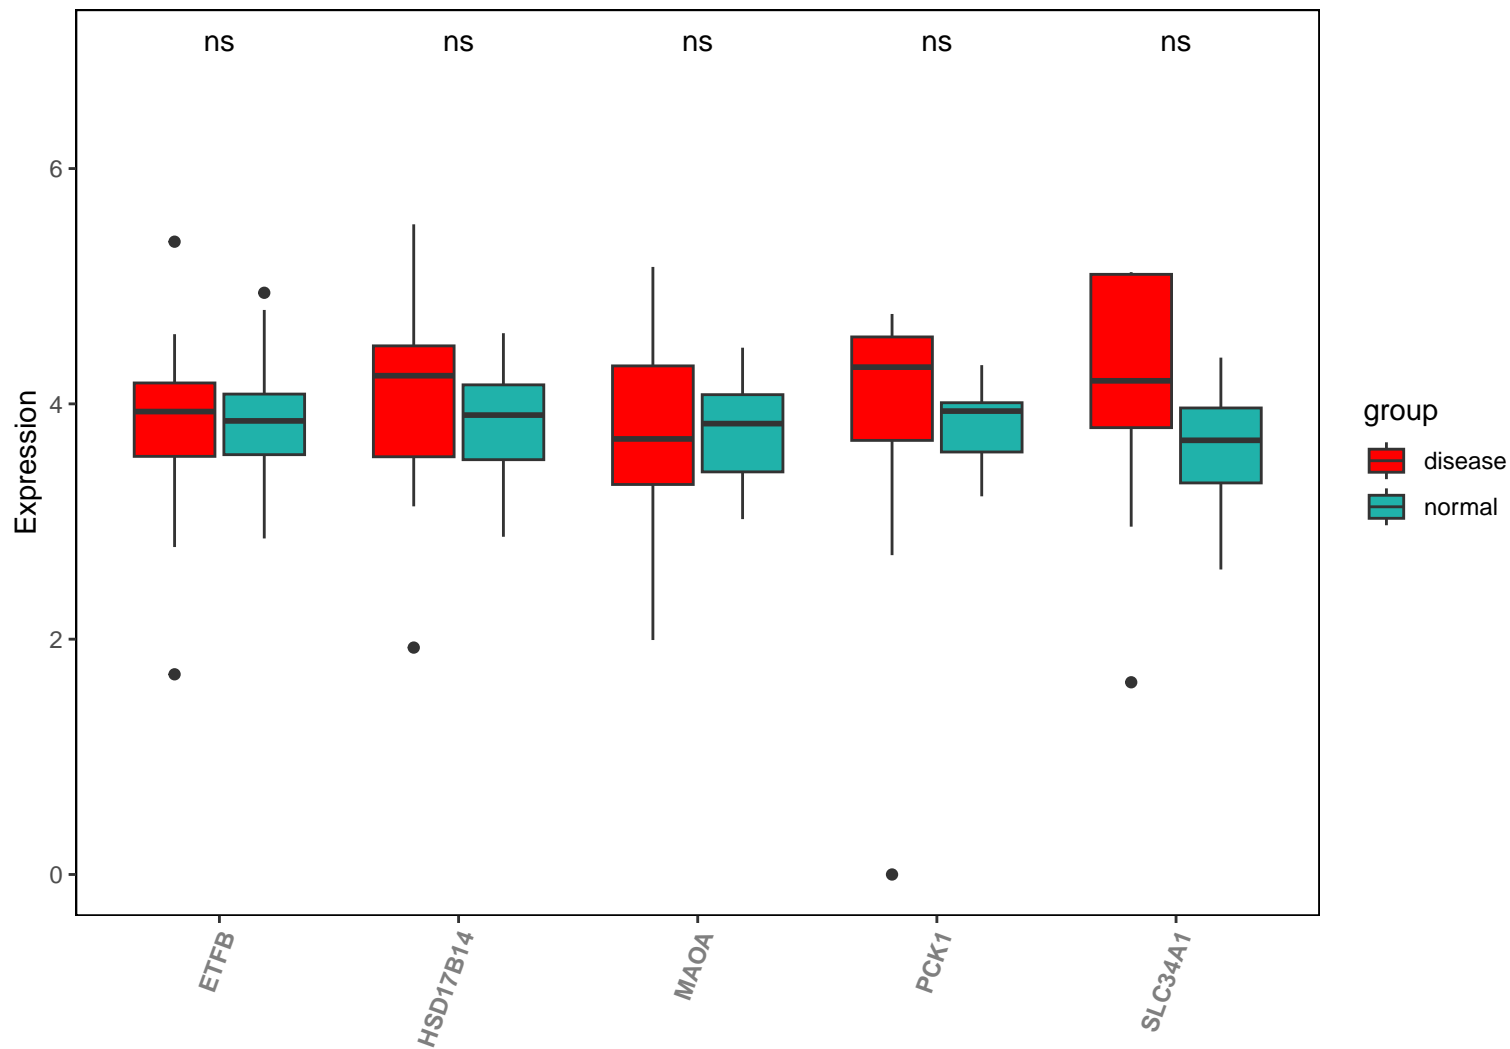

Supplement: Supplementary_raw_data.zip [file 02.brown_hub_gene_Expression_test.pdf › supplementary file/06_expression/brown/02.brown_hub_gene_Expression_test.pdf]

# ITGB6

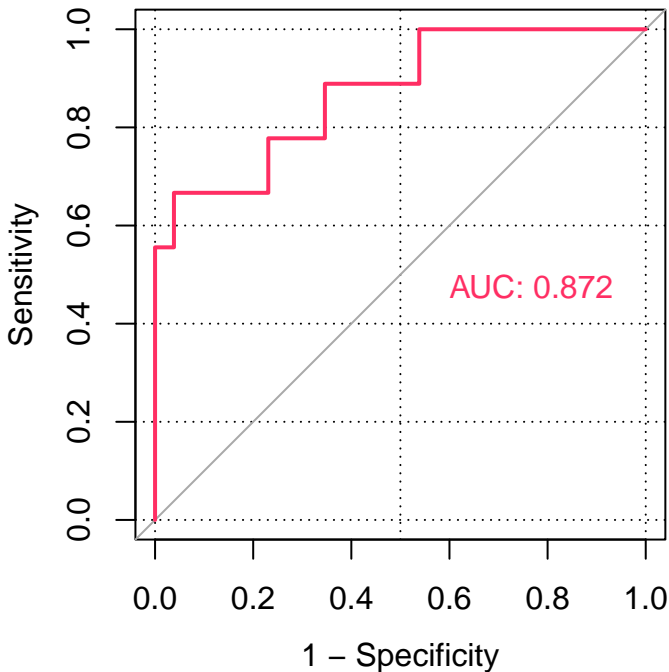

Supplement: Supplementary_raw_data.zip [file 01.ITGB6.pdf › supplementary file/07_ROC/GSE30122/01.ITGB6.pdf]

# LTBP1

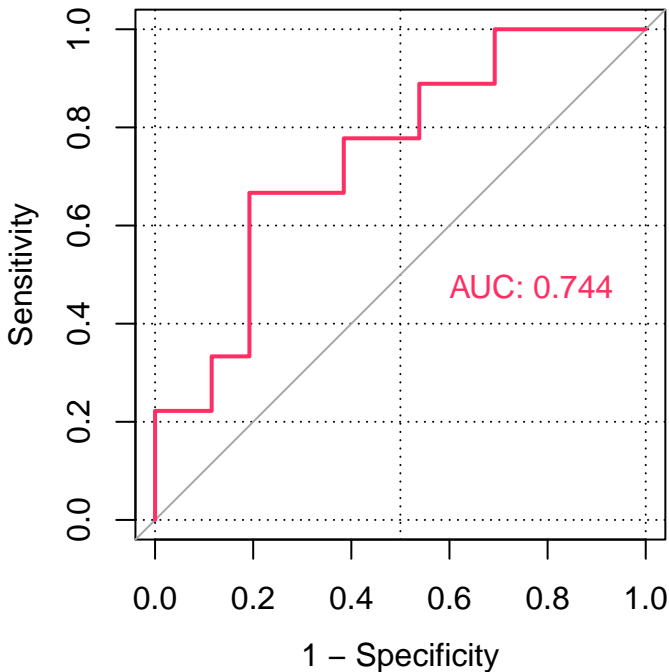

Supplement: Supplementary_raw_data.zip [file 02.LTBP1.pdf › supplementary file/07_ROC/GSE30122/02.LTBP1.pdf]

# ITGB6

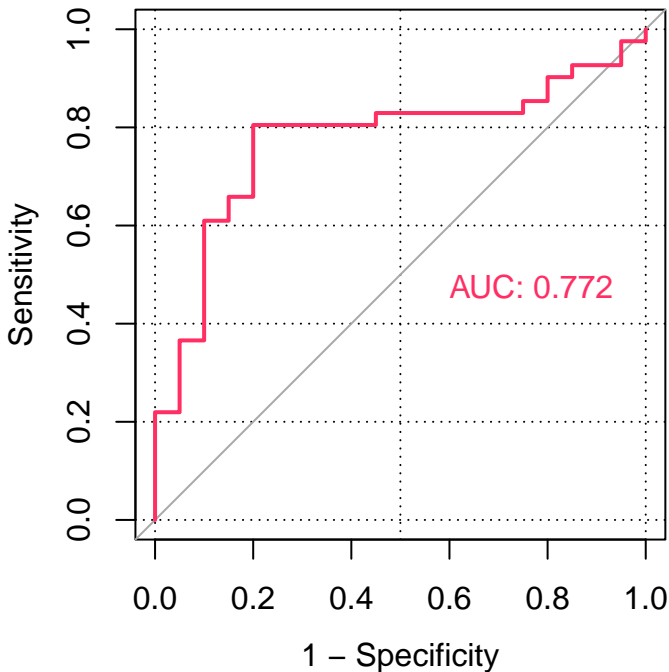

Supplement: Supplementary_raw_data.zip [file 01.ITGB6.pdf › supplementary file/07_ROC/GSE96804/01.ITGB6.pdf]

# LTBP1

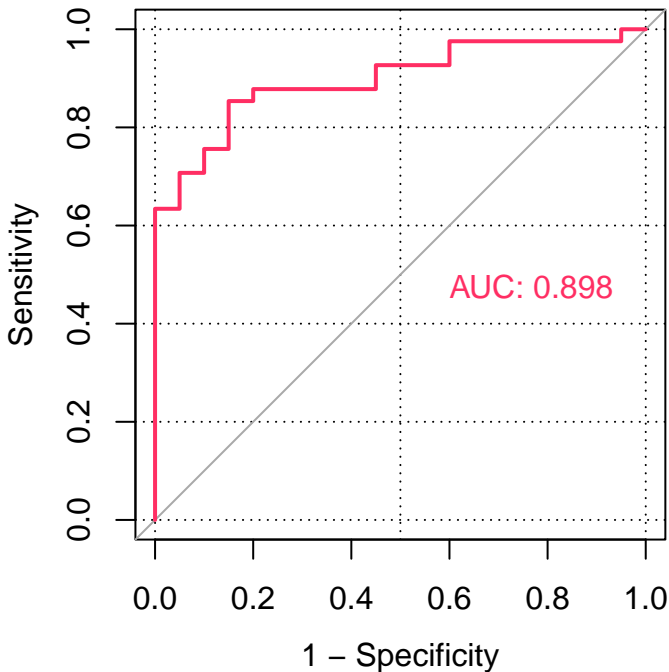

Supplement: Supplementary_raw_data.zip [file 02.LTBP1.pdf › supplementary file/07_ROC/GSE96804/02.LTBP1.pdf]

# ***nomogram***

*Points*

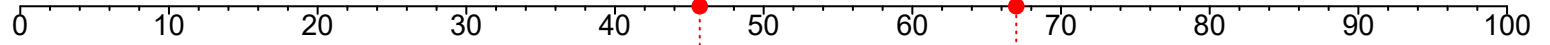

ITGB6

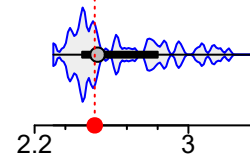

LTBP1

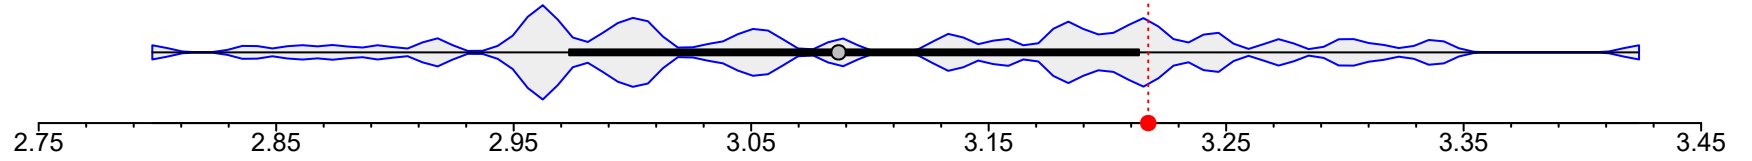

***Total points***

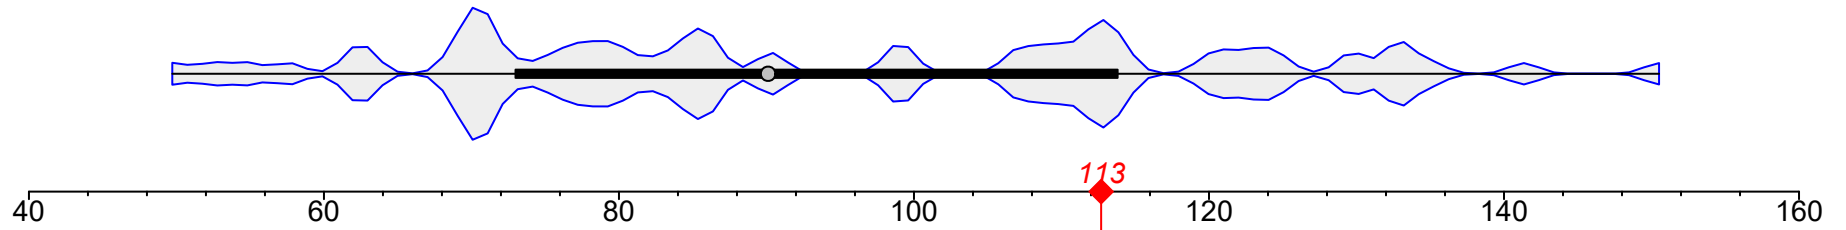

*Pr( group )*

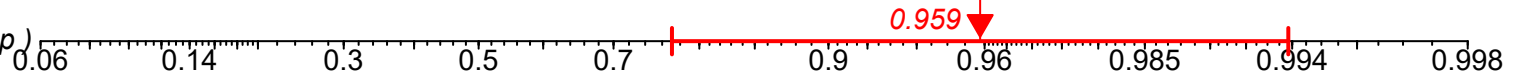

Supplement: Supplementary_raw_data.zip [file 01_nomogram.pdf › supplementary file/08_nomogram/01_nomogram.pdf]

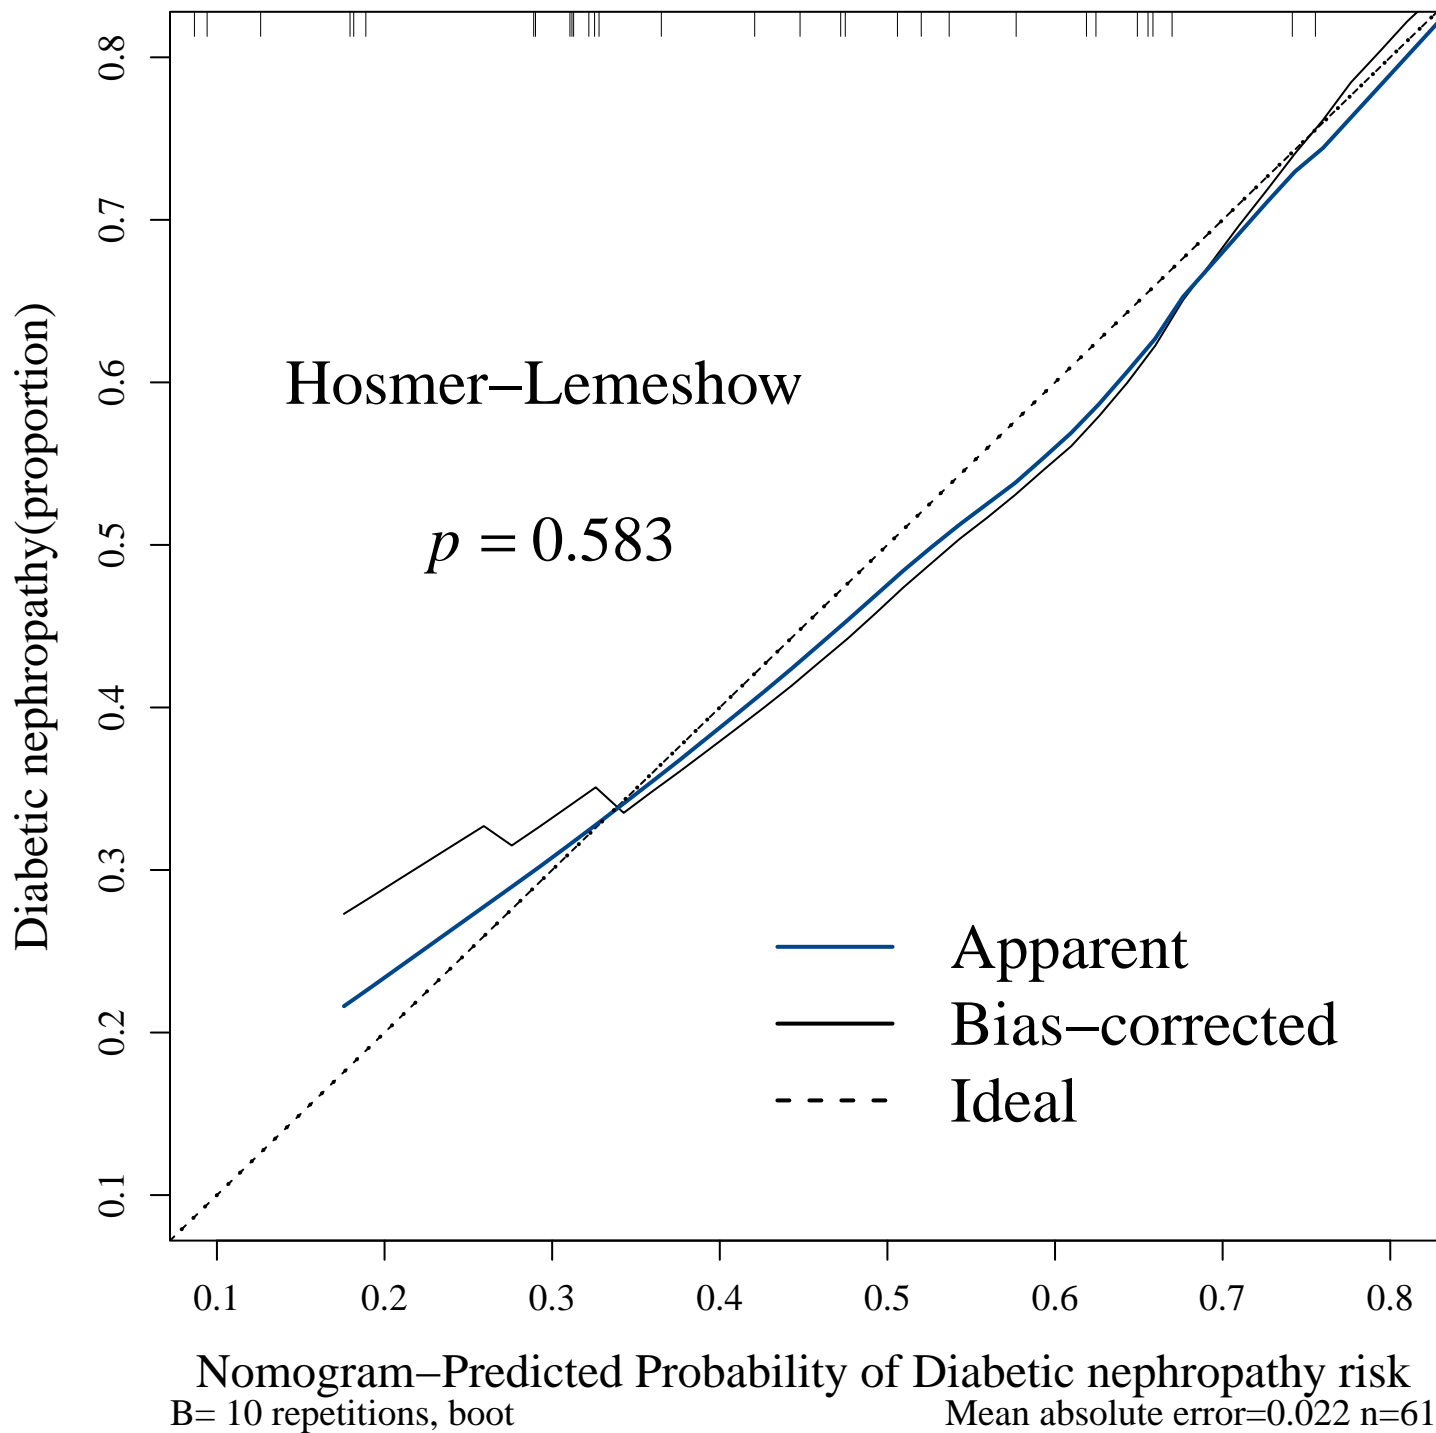

Supplement: Supplementary_raw_data.zip [file 03.calibrate.pdf › supplementary file/08_nomogram/03.calibrate.pdf]

# ROC curve

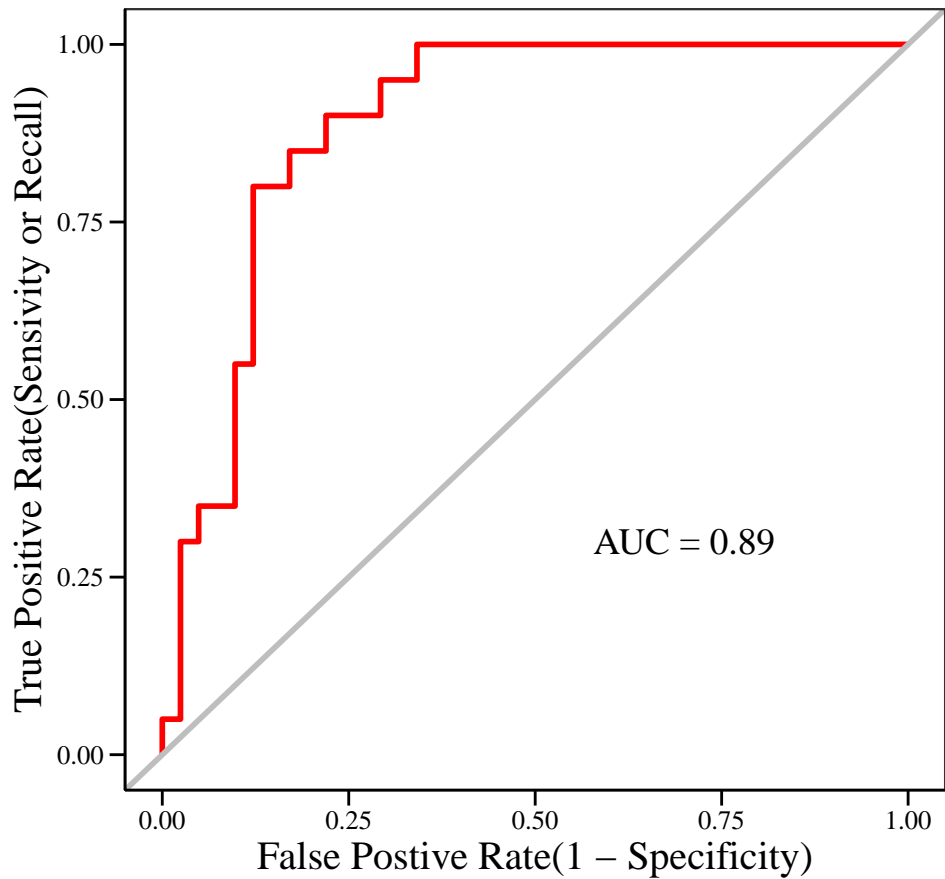

Supplement: Supplementary_raw_data.zip [file 04.model_ROC.pdf › supplementary file/08_nomogram/04.model_ROC.pdf]

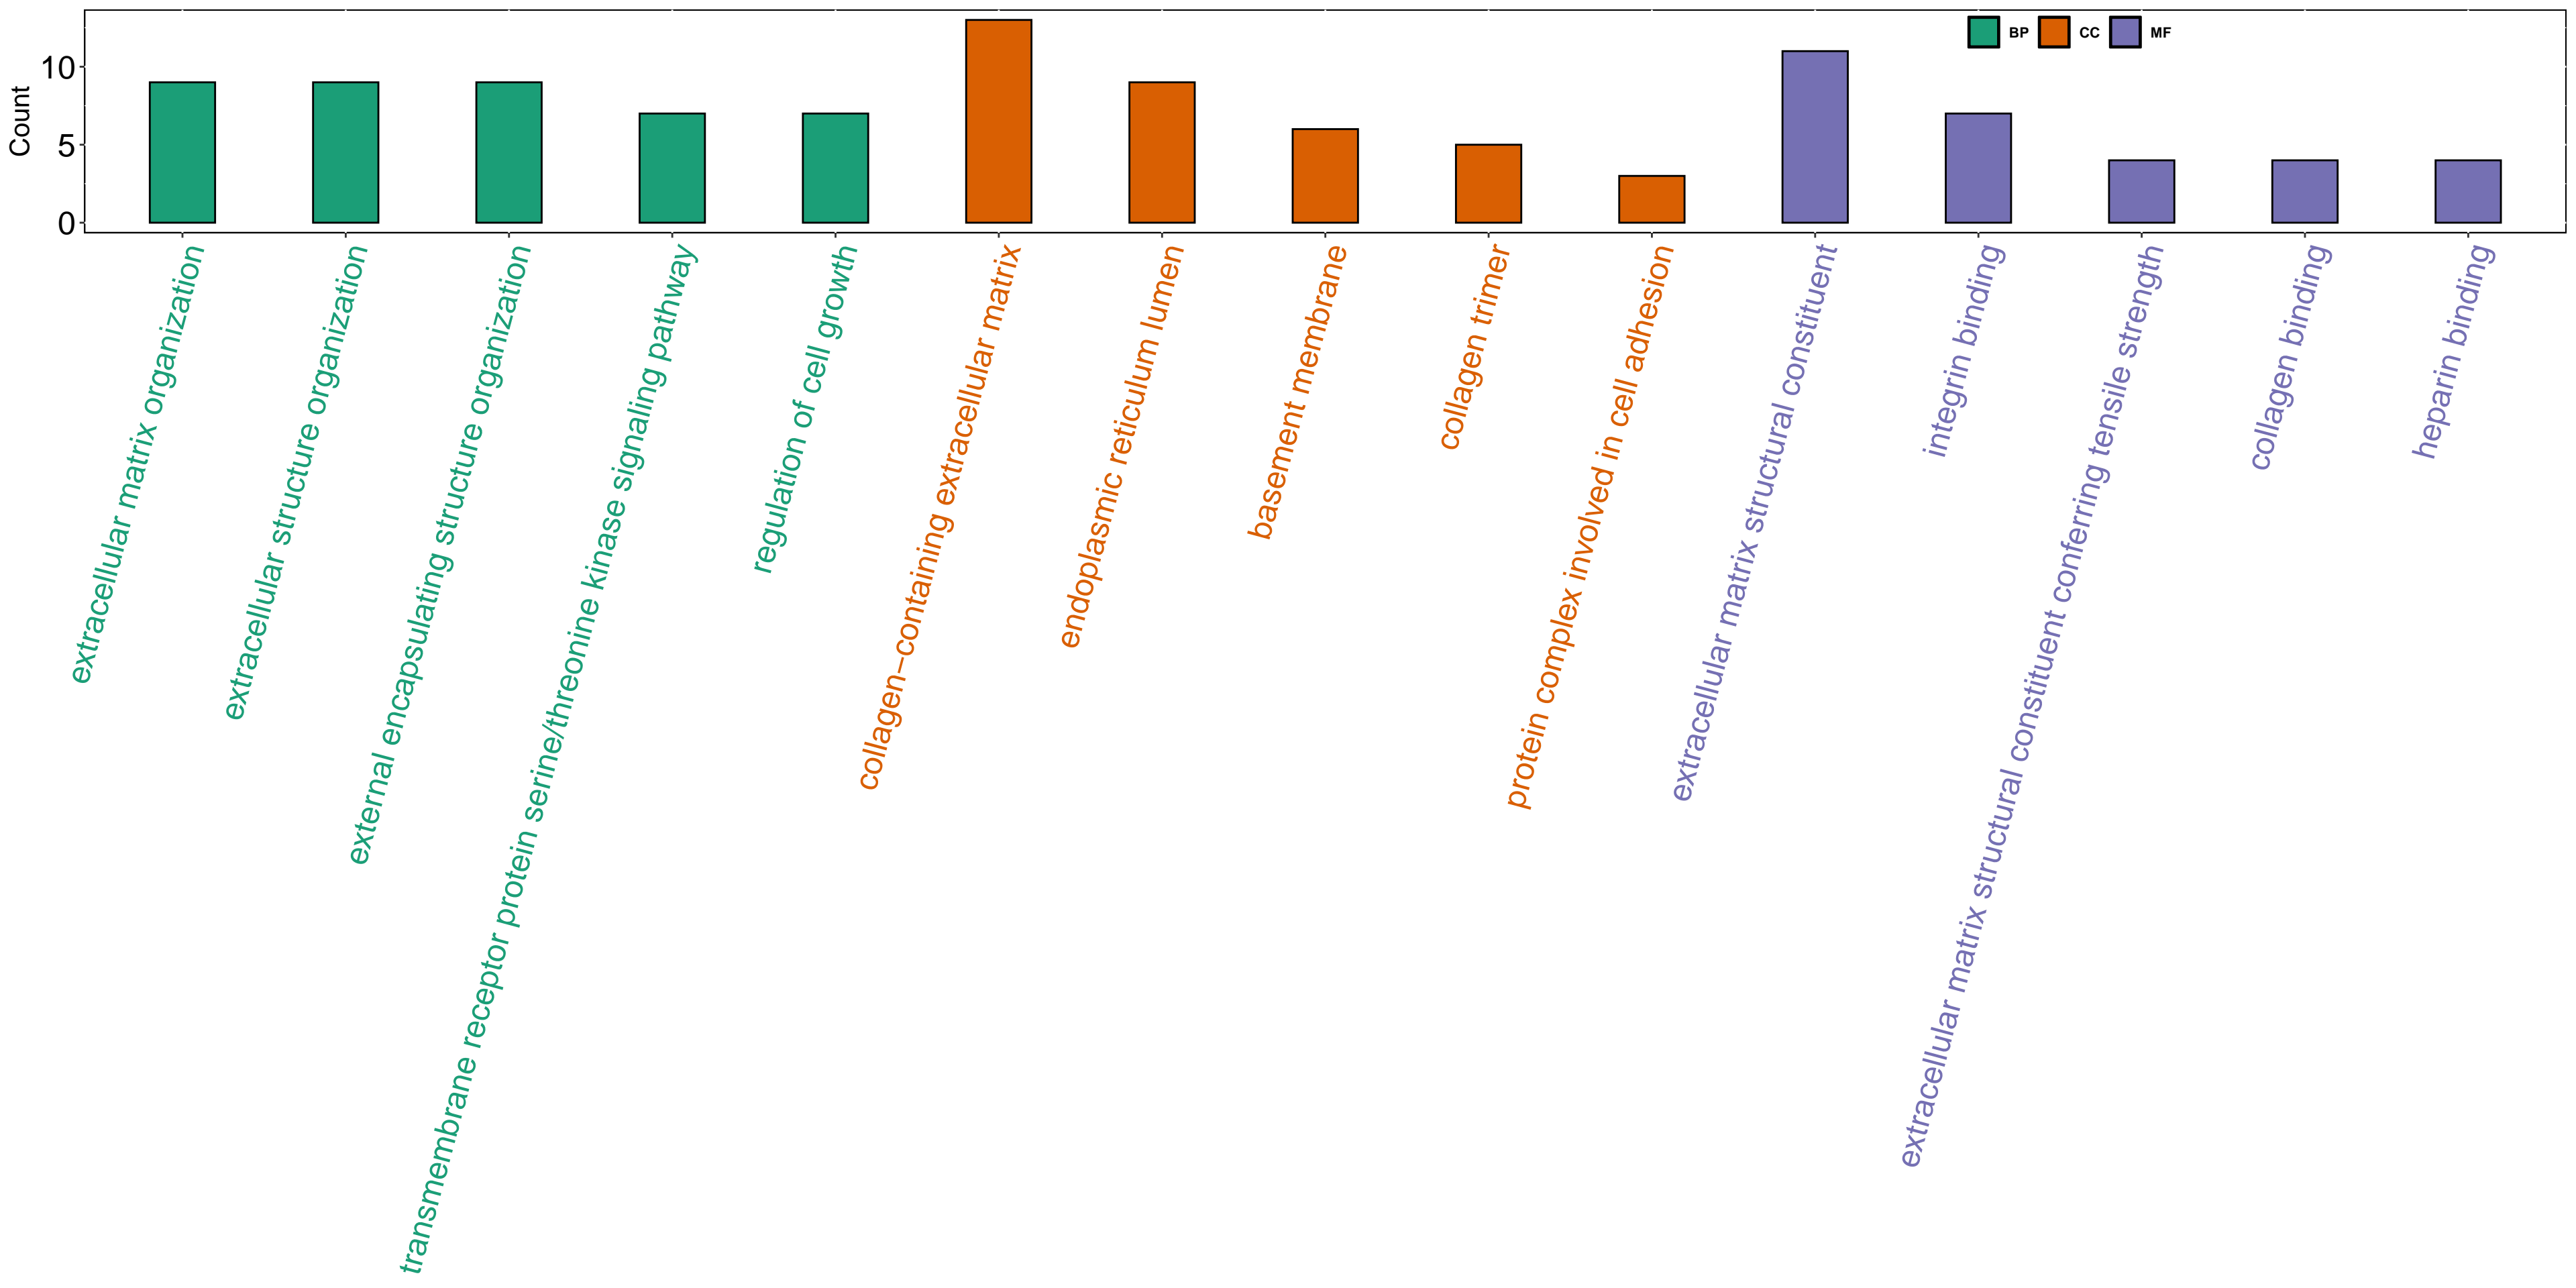

Supplement: Supplementary_raw_data.zip [file 01.go_sig_Horizontal_bar.pdf › supplementary file/09_enrichment/GO/01.go_sig_Horizontal_bar.pdf]

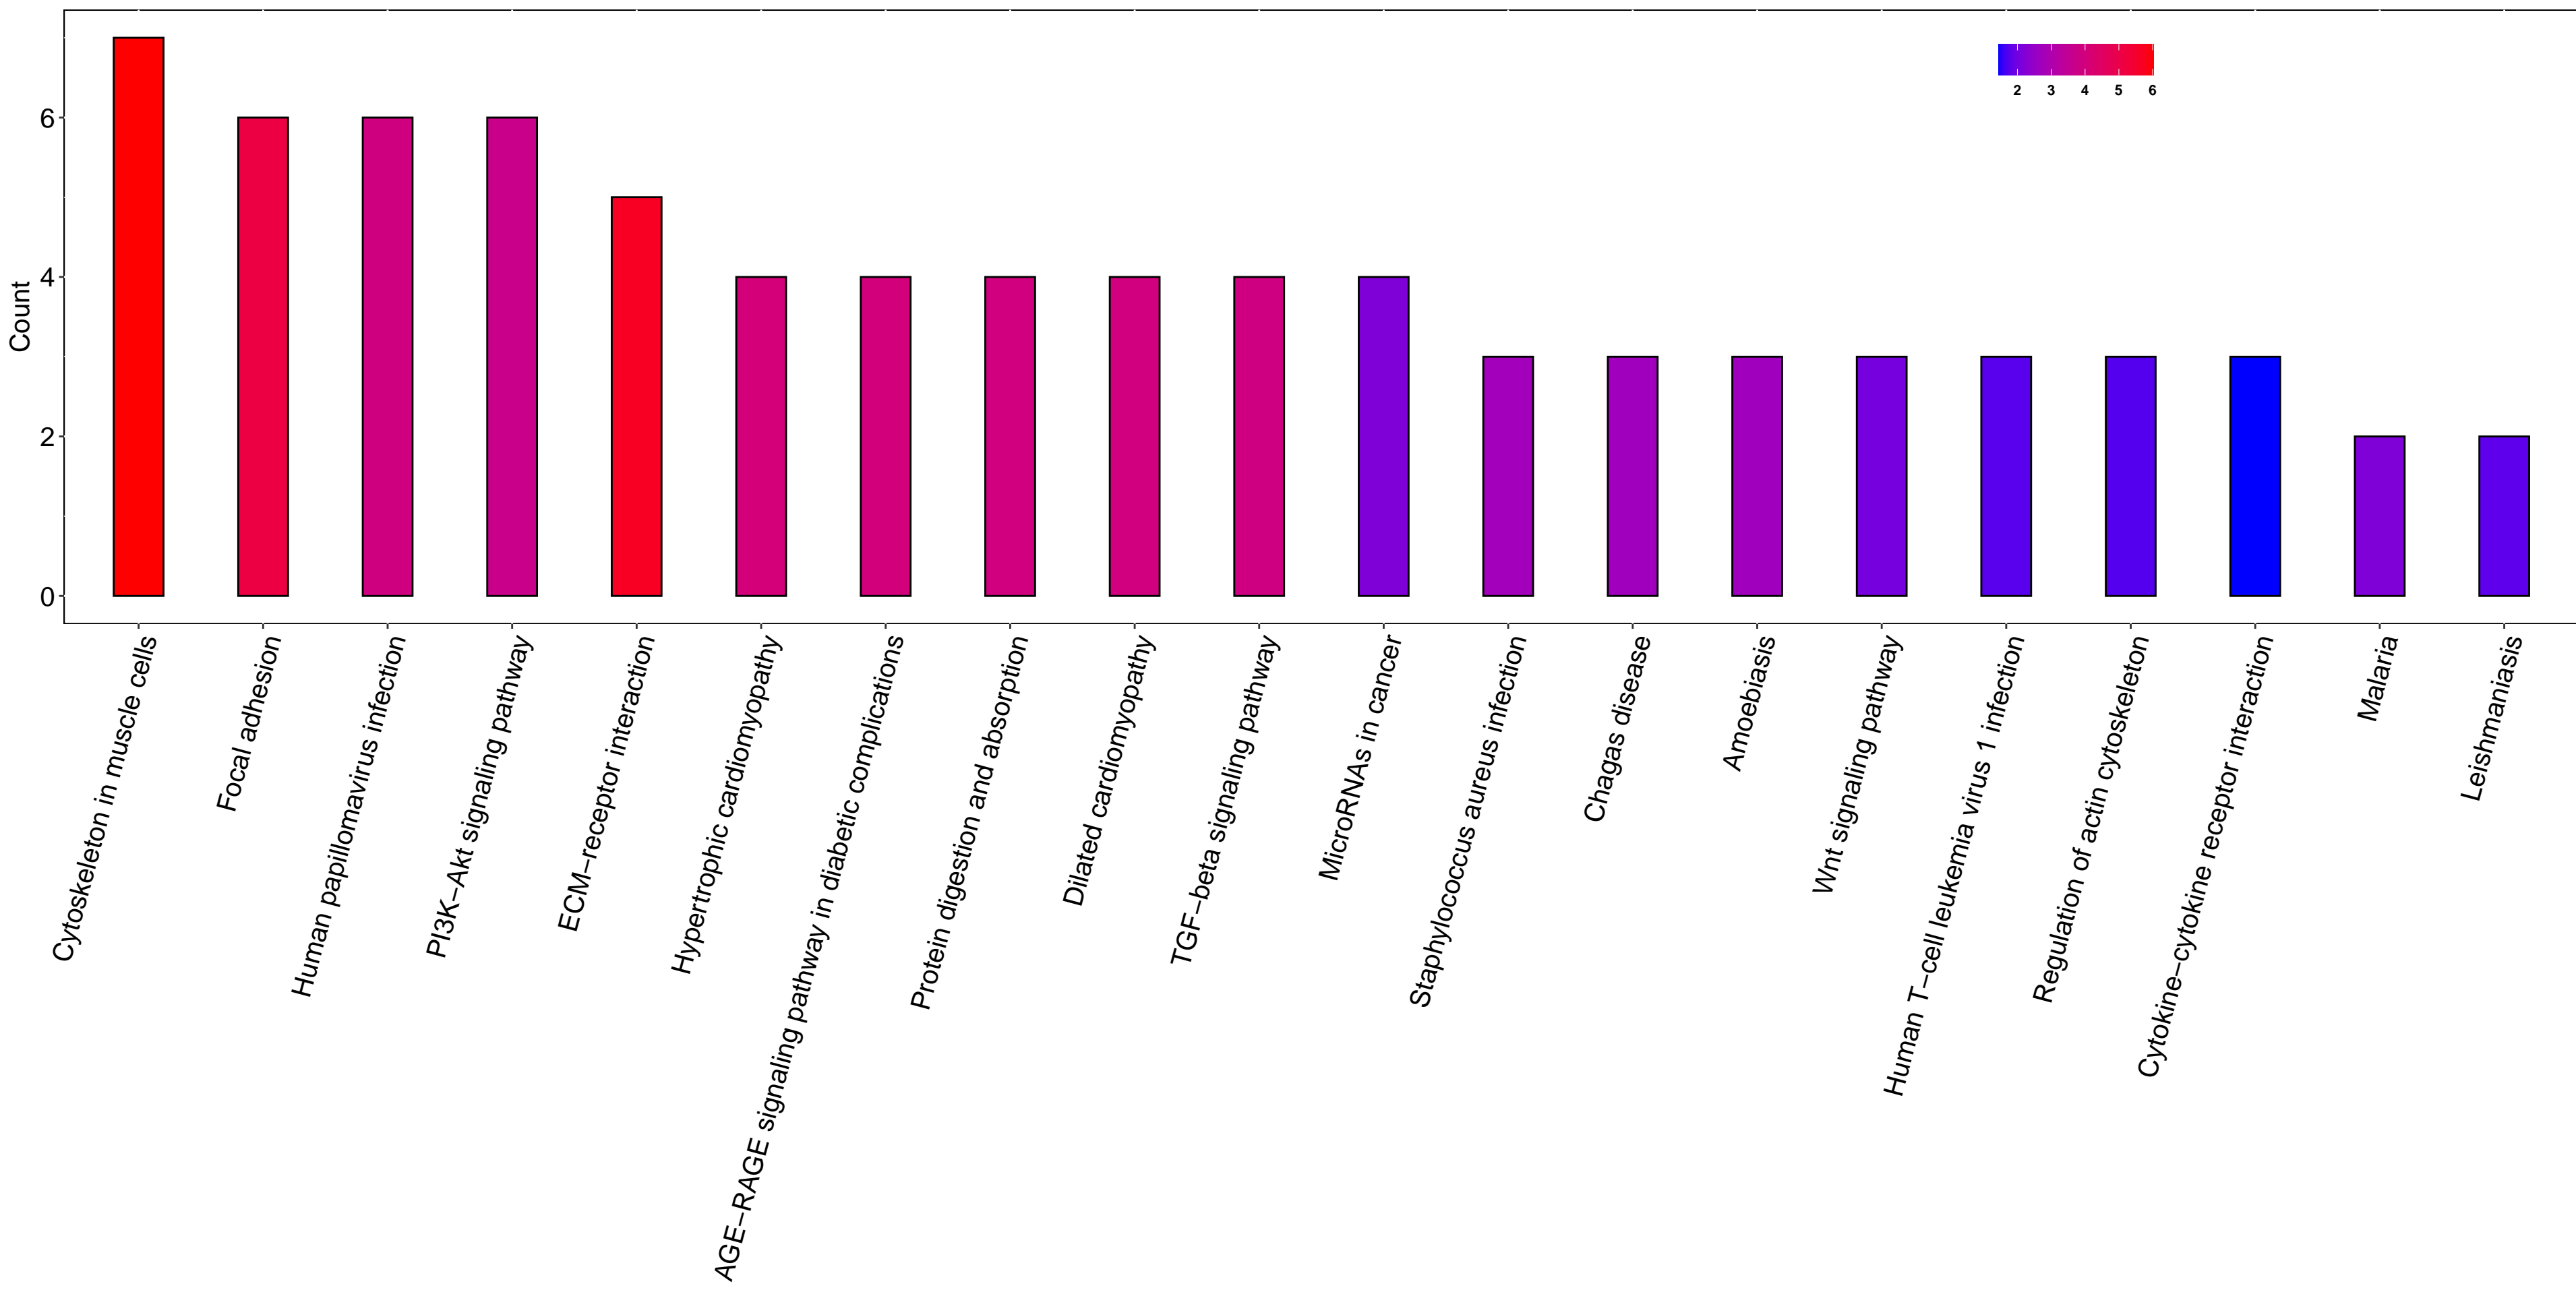

Supplement: Supplementary_raw_data.zip [file 01.kegg_res_Horizontal_bar.pdf › supplementary file/09_enrichment/KEGG/01.kegg_res_Horizontal_bar.pdf]

# GO Terms Enrich

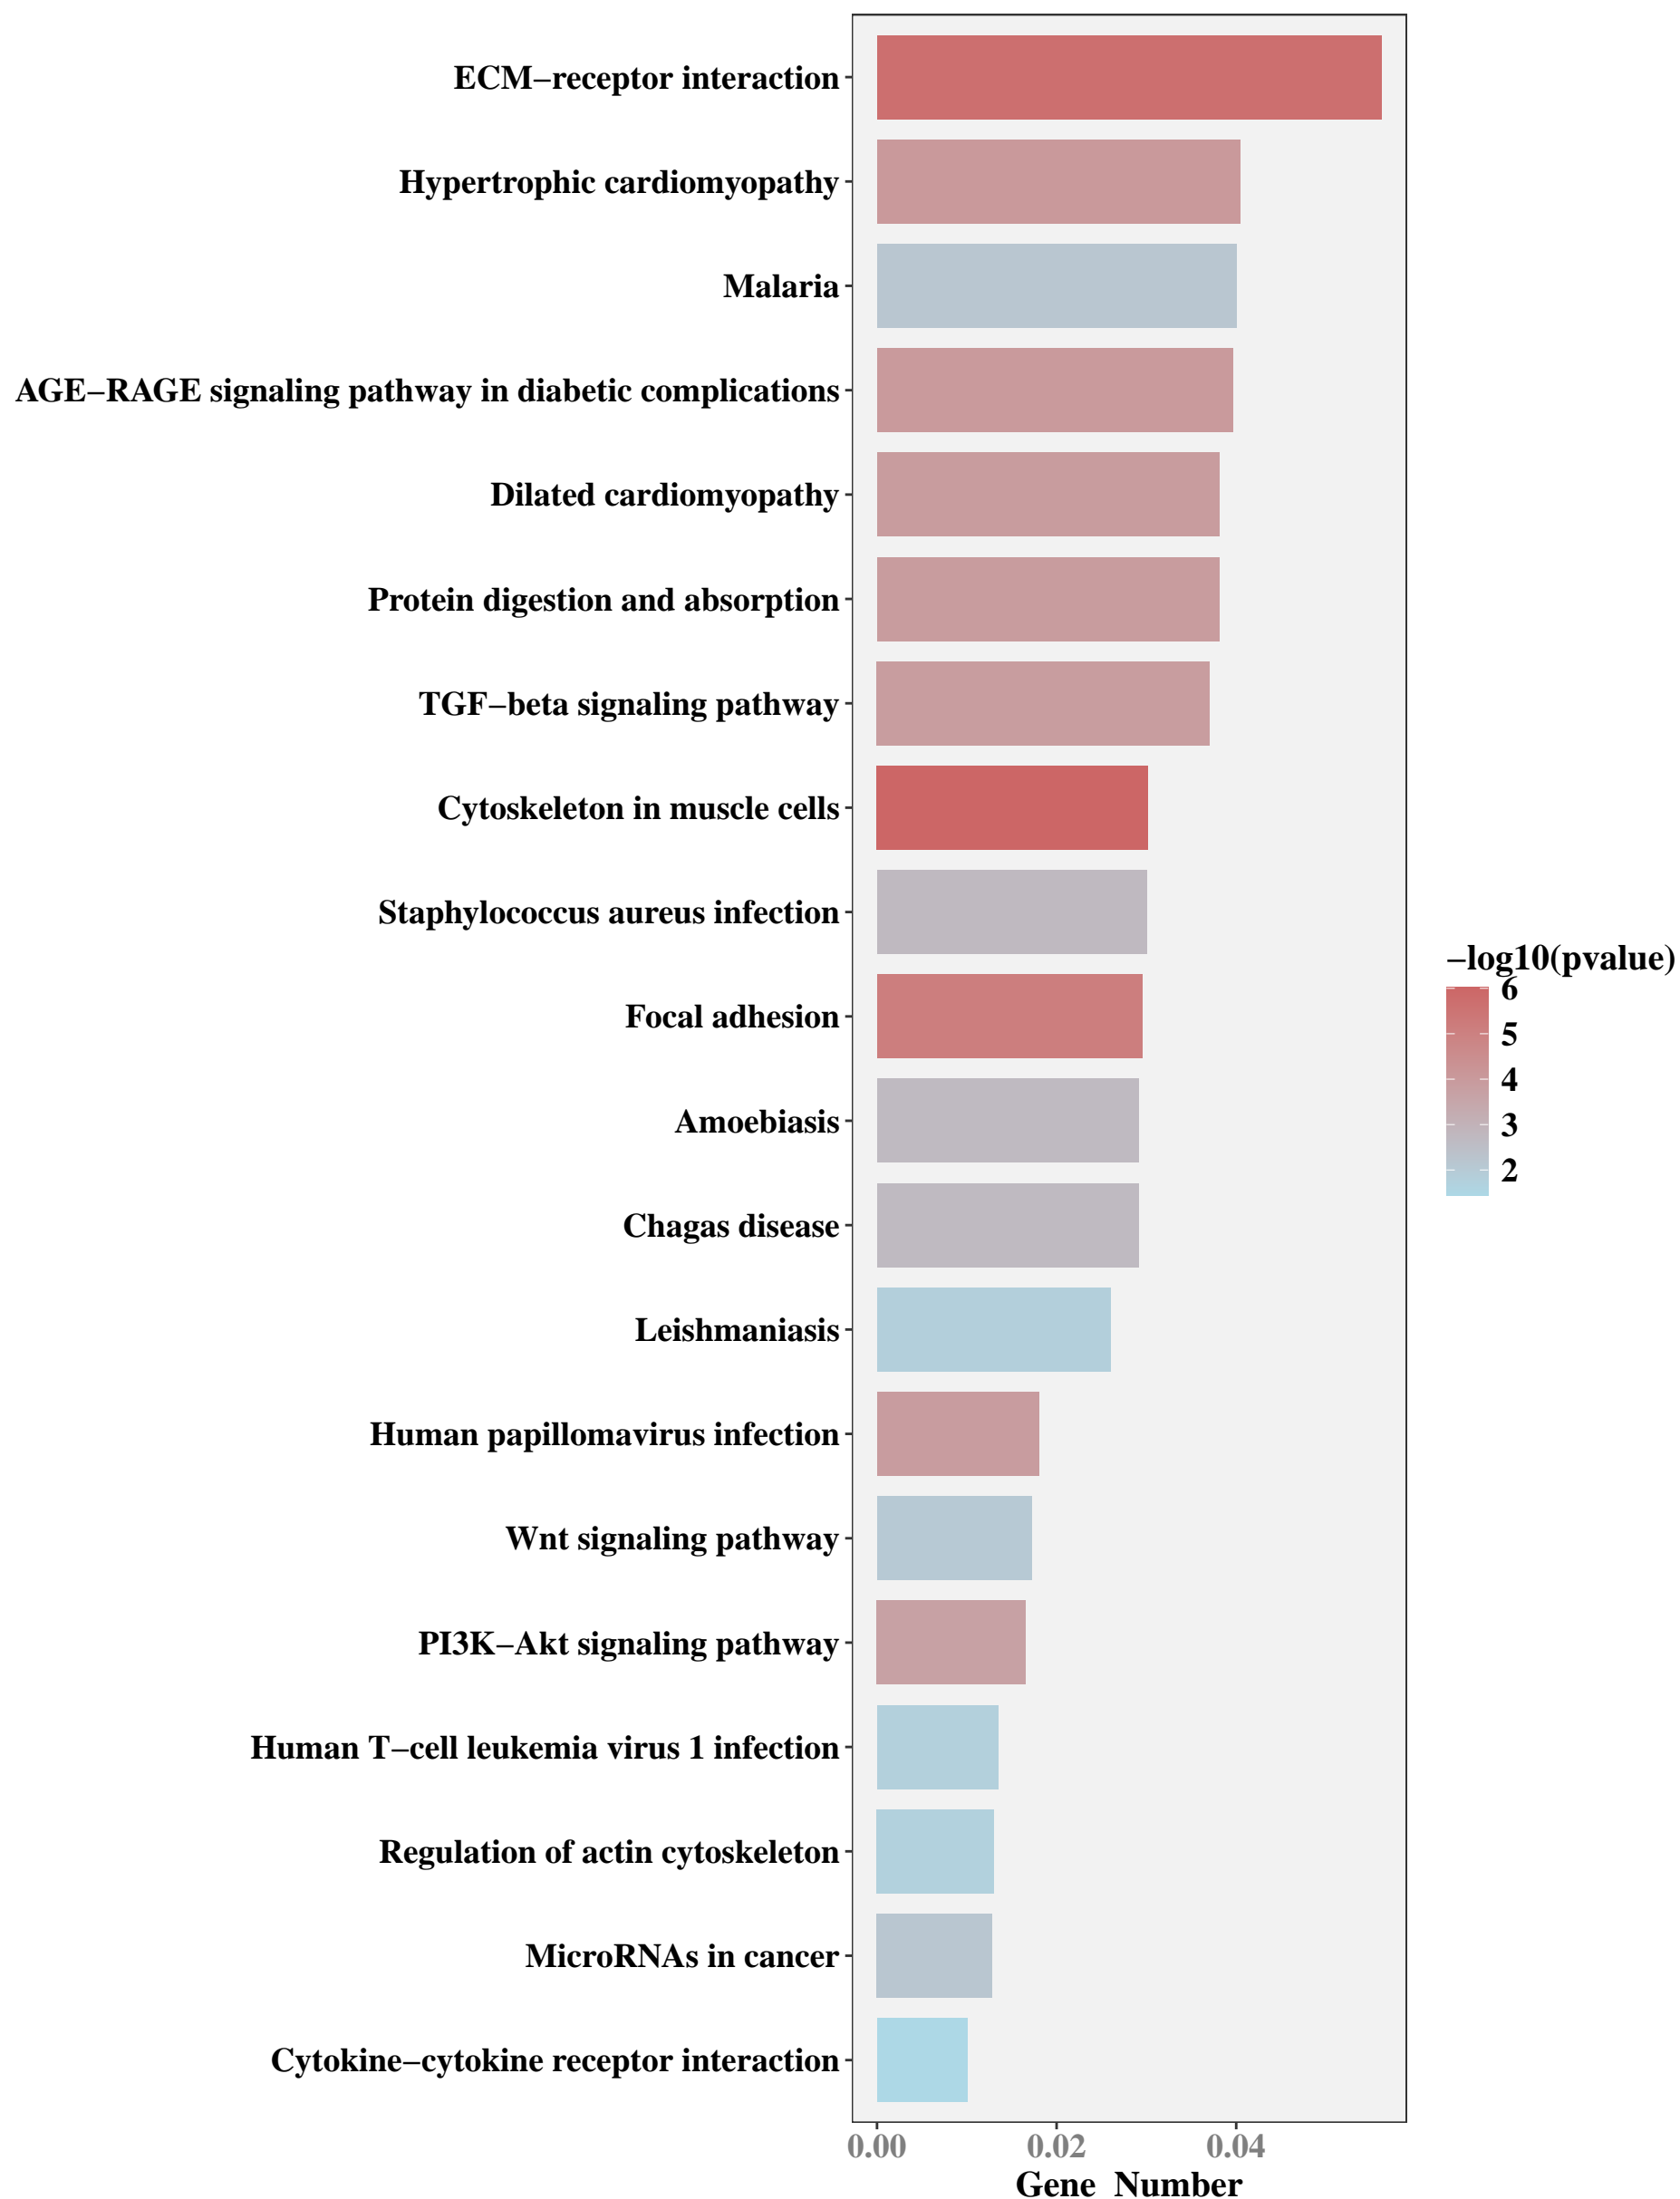

Supplement: Supplementary_raw_data.zip [file 02.kegg_res_vertical_bar.pdf › supplementary file/09_enrichment/KEGG/02.kegg_res_vertical_bar.pdf]

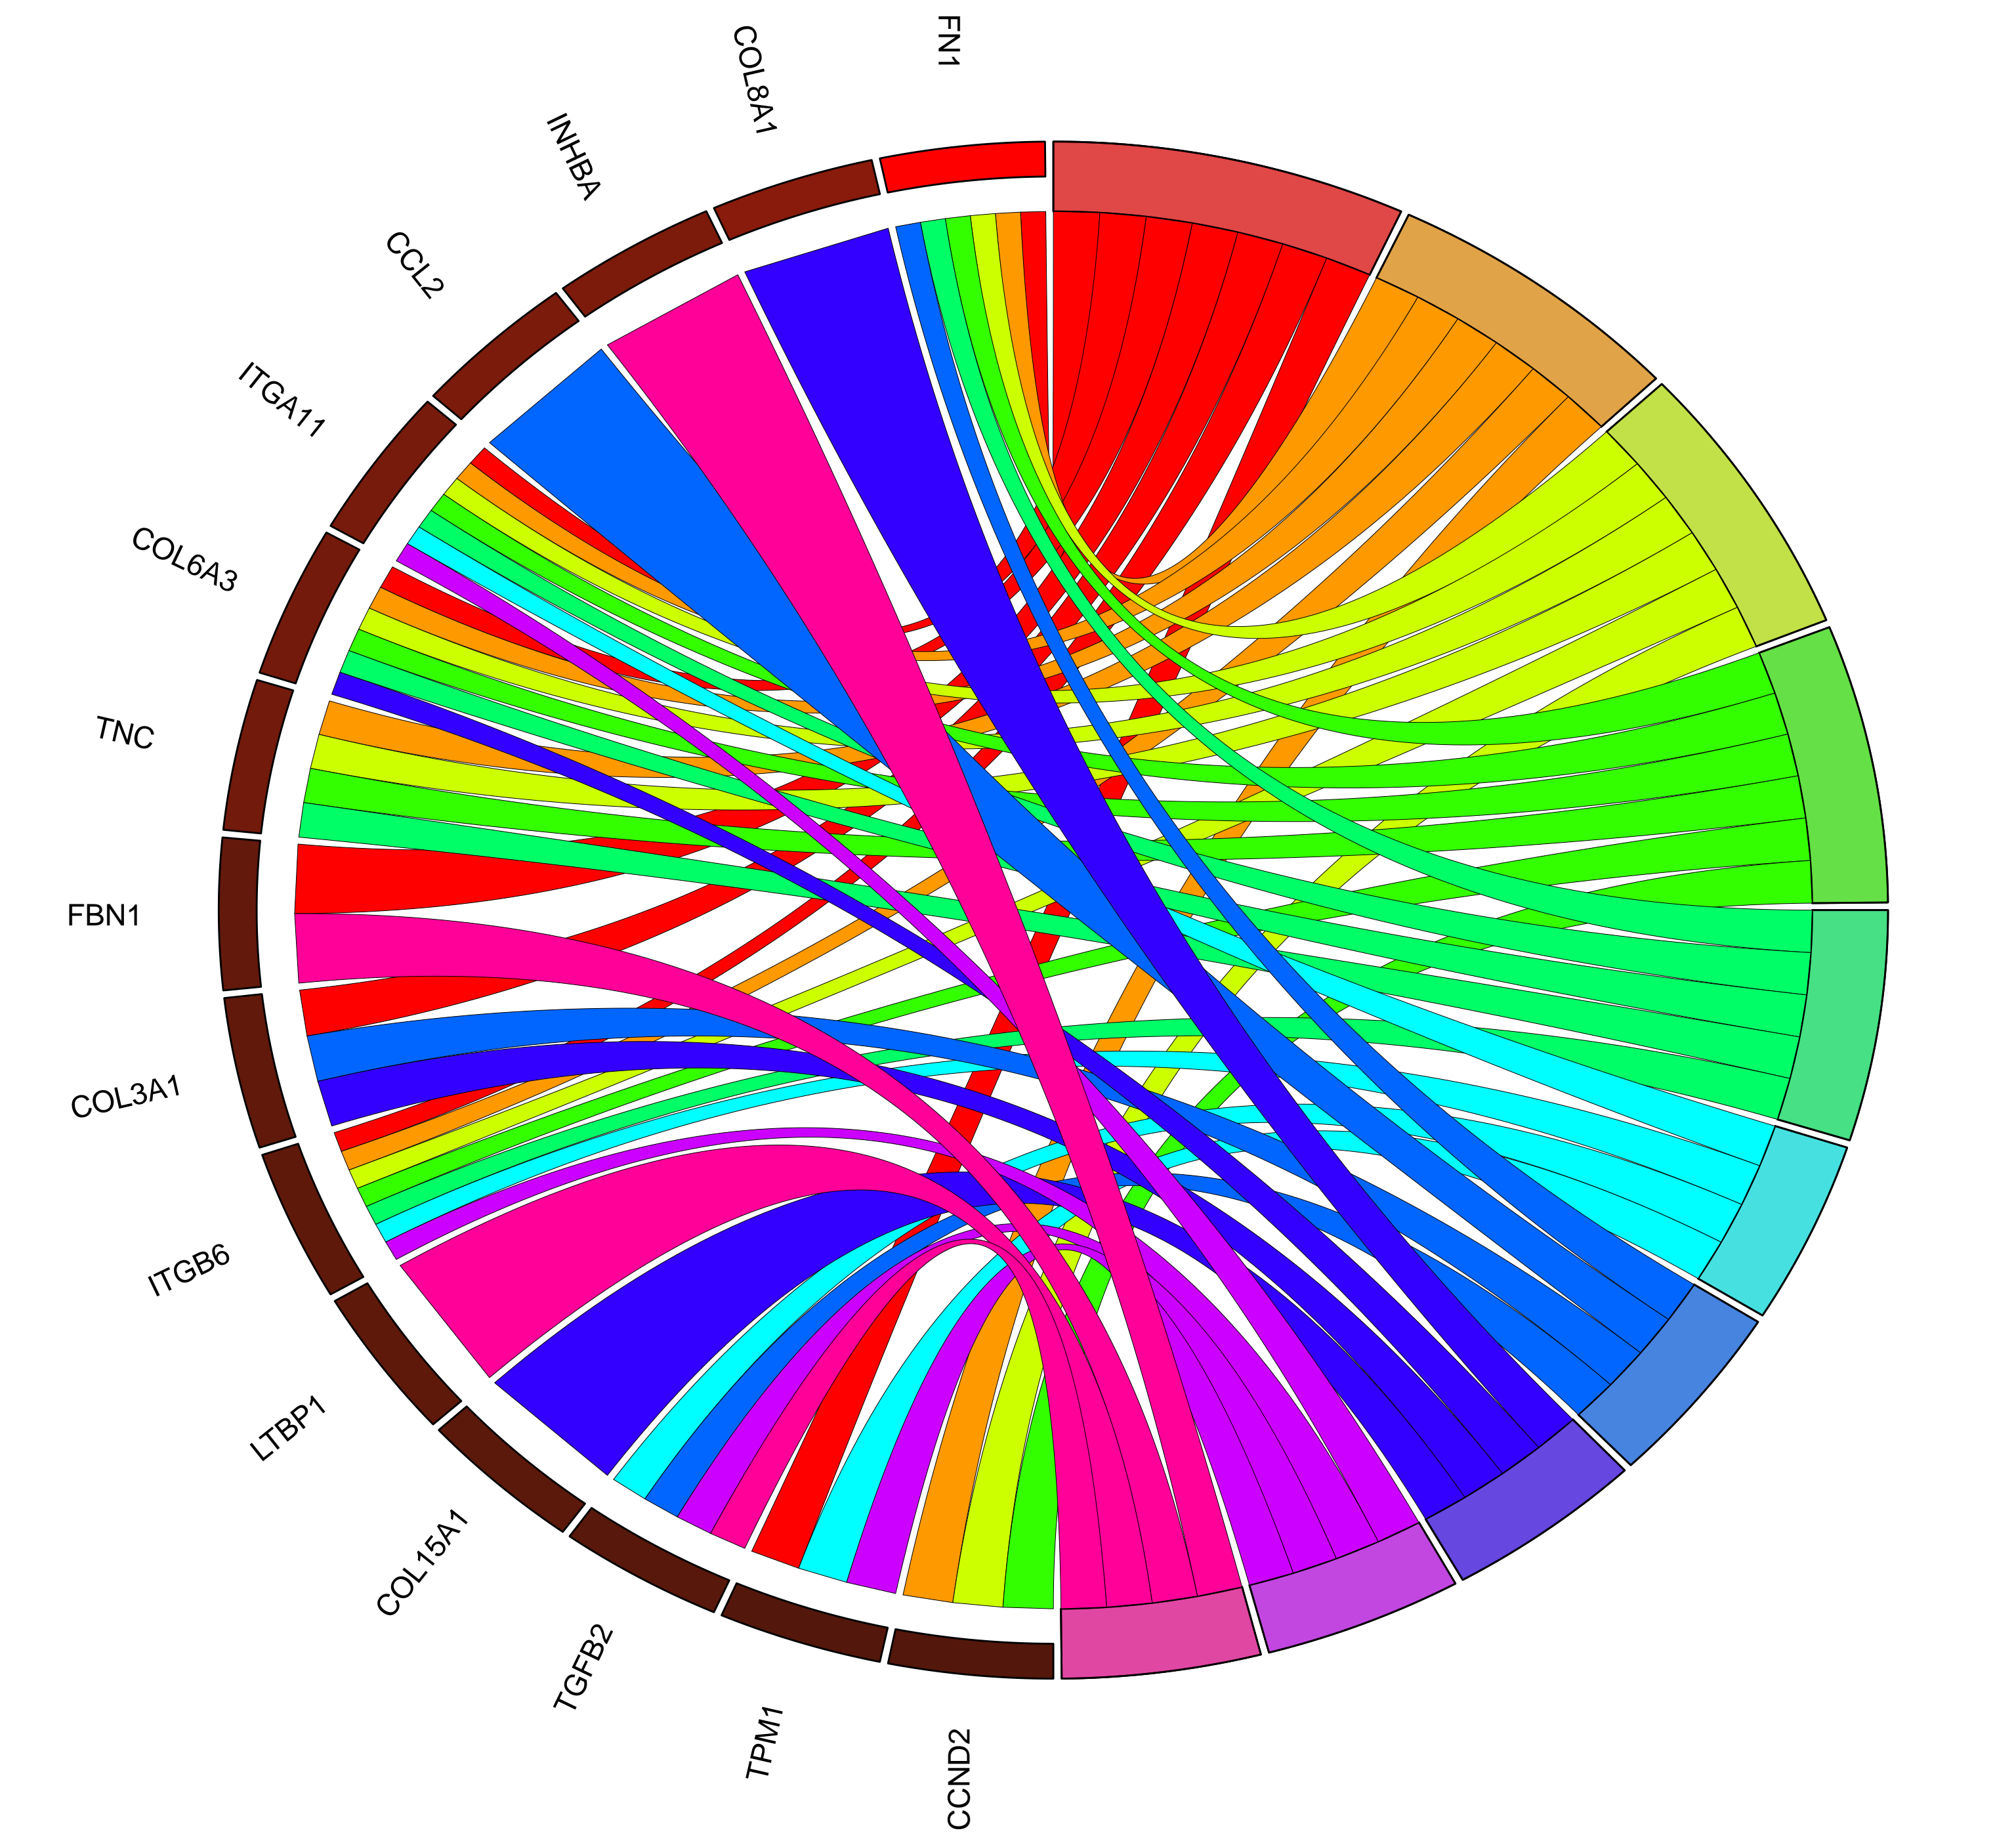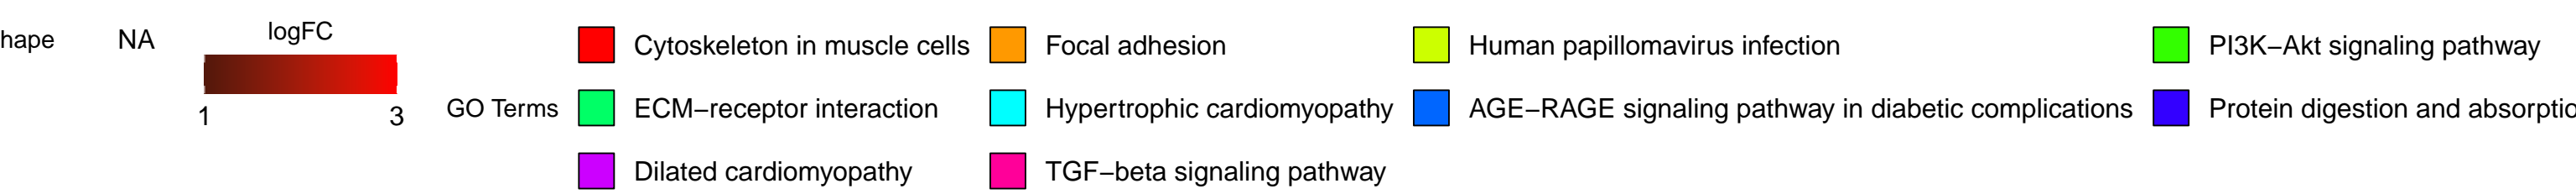

Supplement: Supplementary_raw_data.zip [file KEGG_chord.pdf › supplementary file/09_enrichment/KEGG/KEGG_chord.pdf]

# Cibersort

Group ■ disease ■ normal

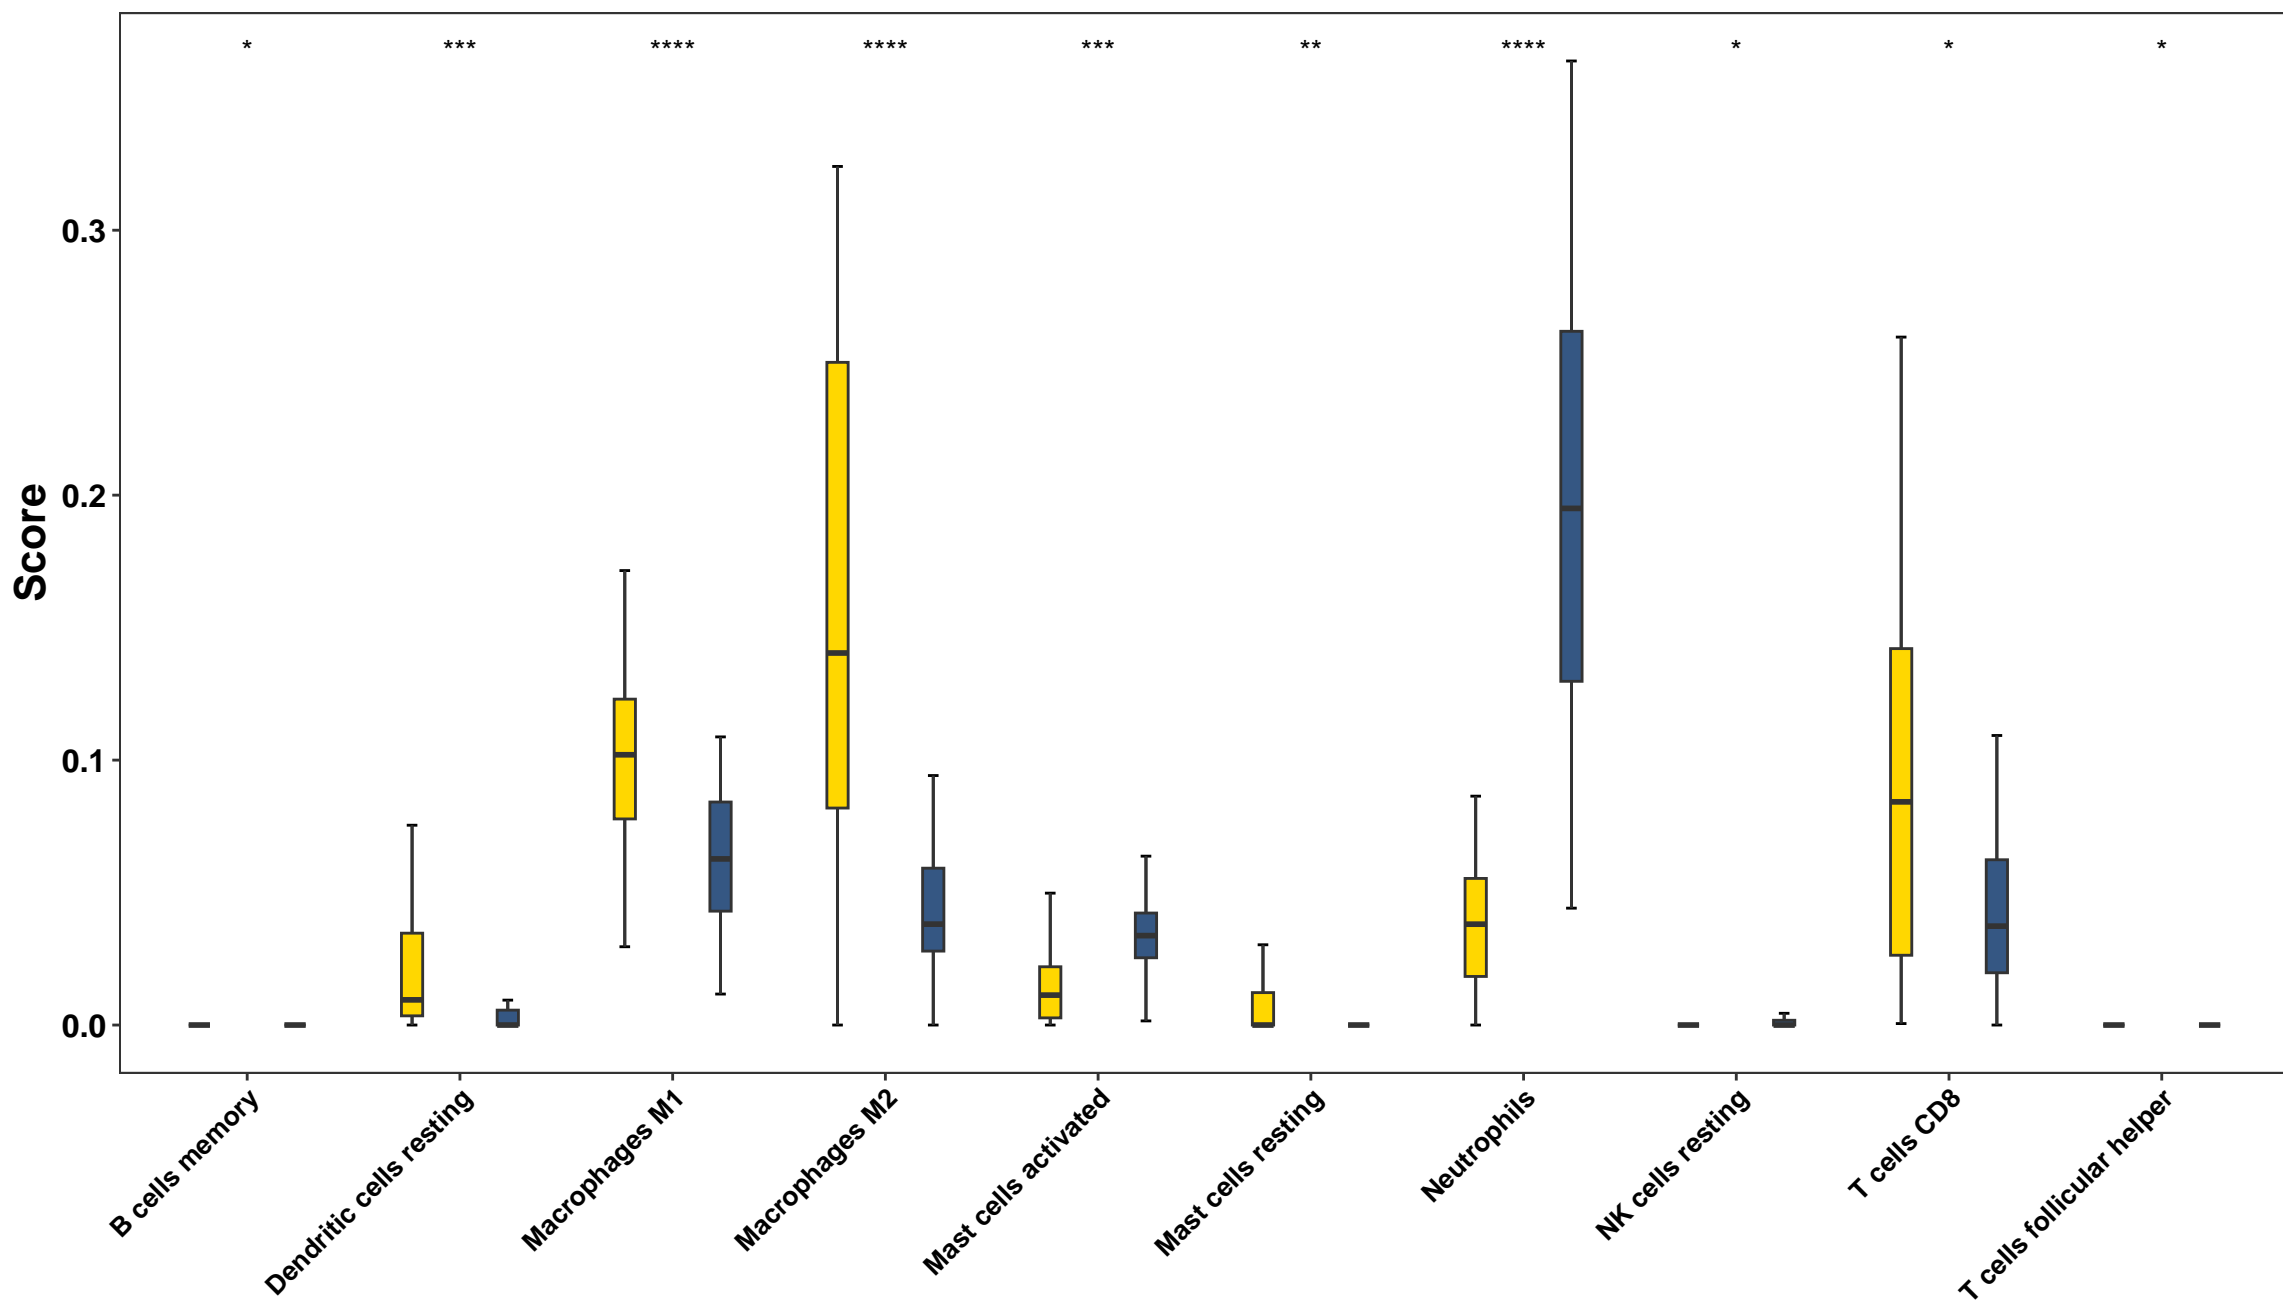

Supplement: Supplementary_raw_data.zip [file 01.immue_cell_bar.pdf › supplementary file/11_immune_infiltration/cibersort/01.immue_cell_bar.pdf]

# ssGSEA

Group ■ disease ■ normal

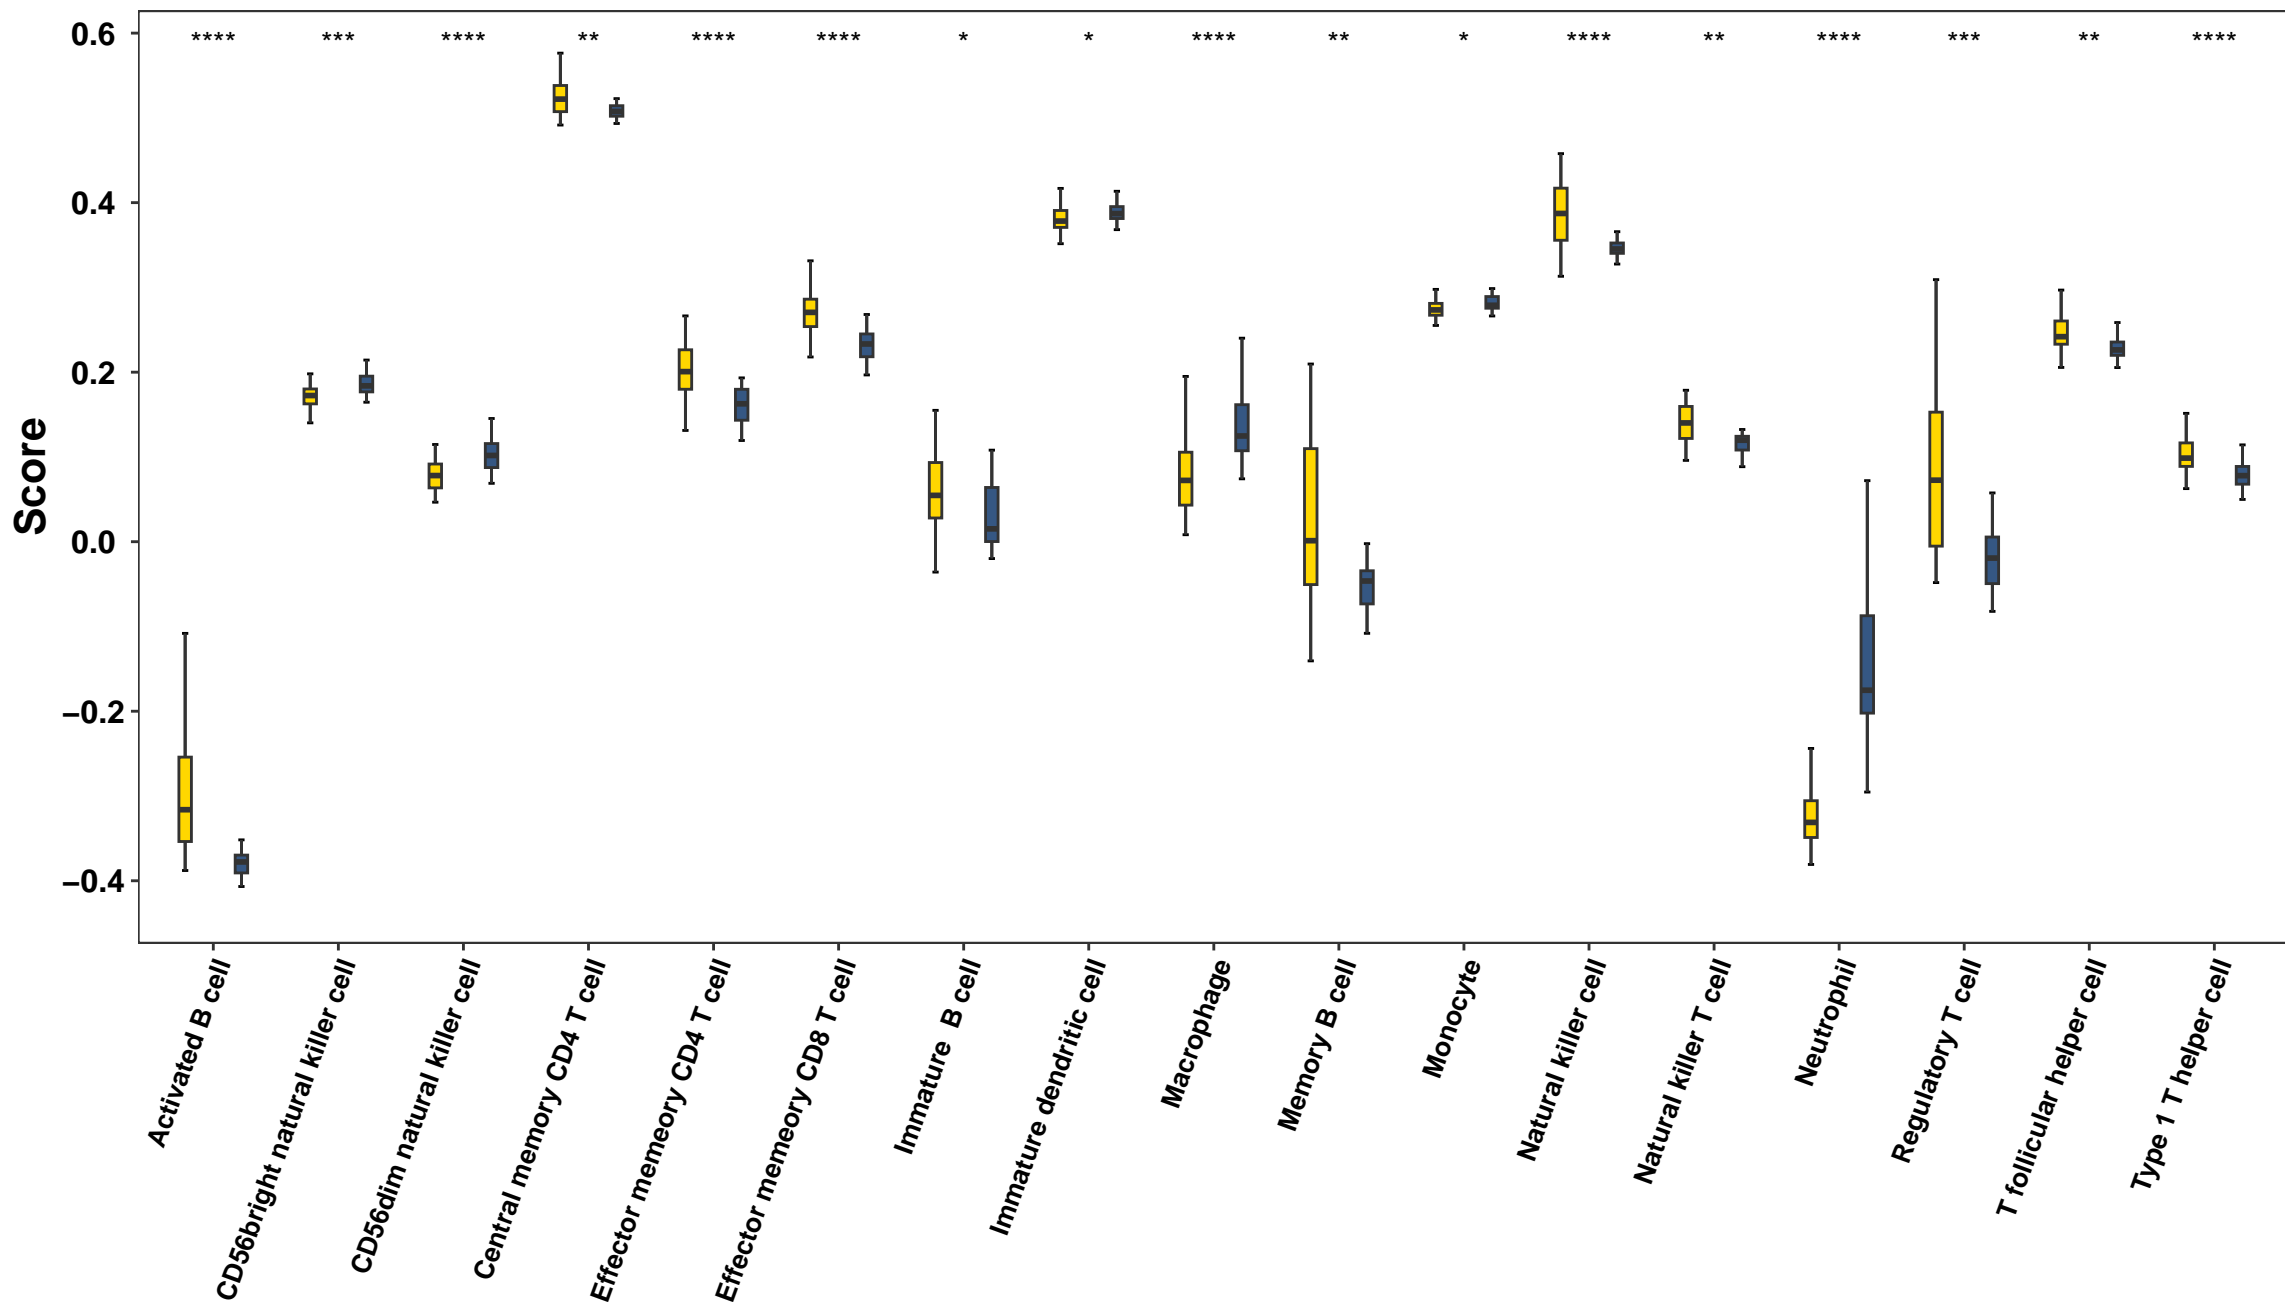

Supplement: Supplementary_raw_data.zip [file 01.immue_cell_bar.pdf › supplementary file/11_immune_infiltration/ssGSEA/01.immue_cell_bar.pdf]

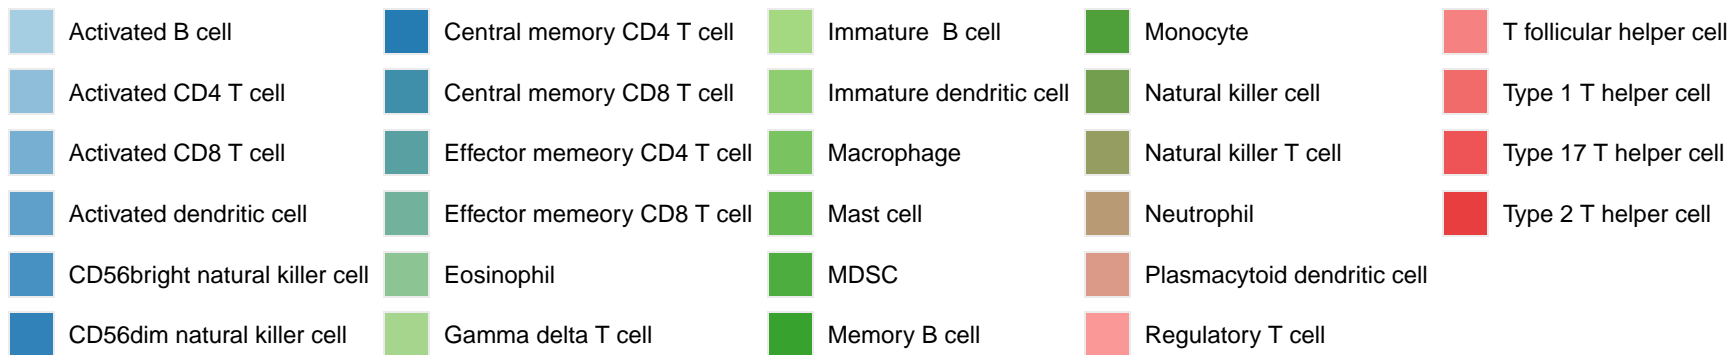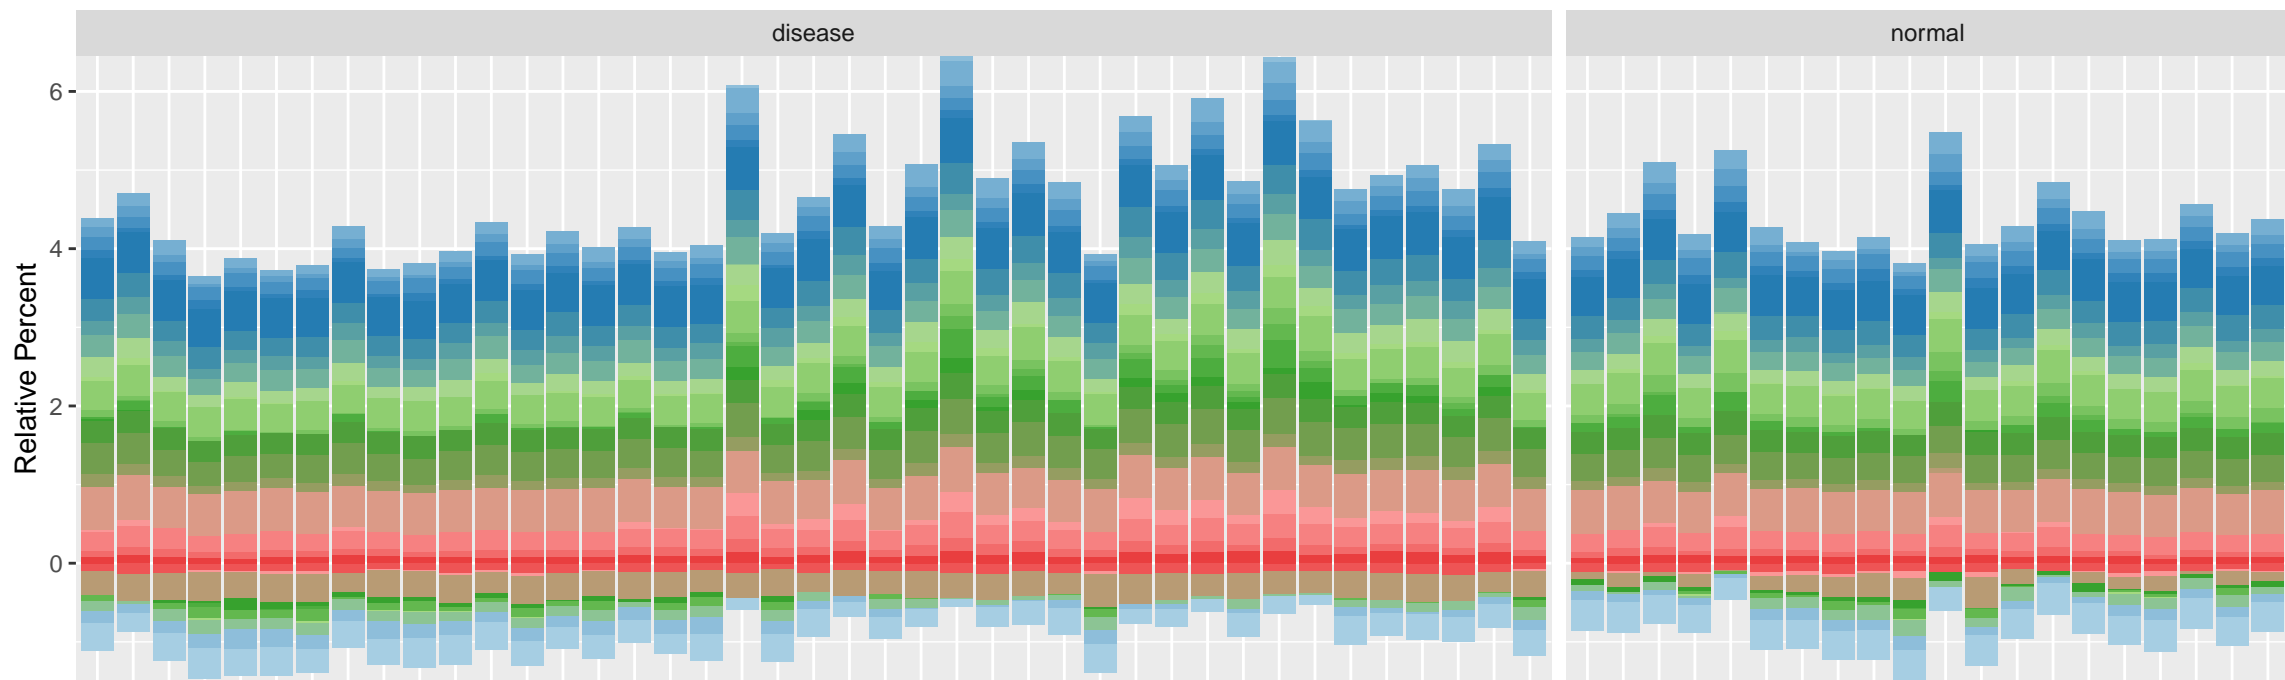

Supplement: Supplementary_raw_data.zip [file 02.immue_cell_map.pdf › supplementary file/11_immune_infiltration/ssGSEA/02.immue_cell_map.pdf]

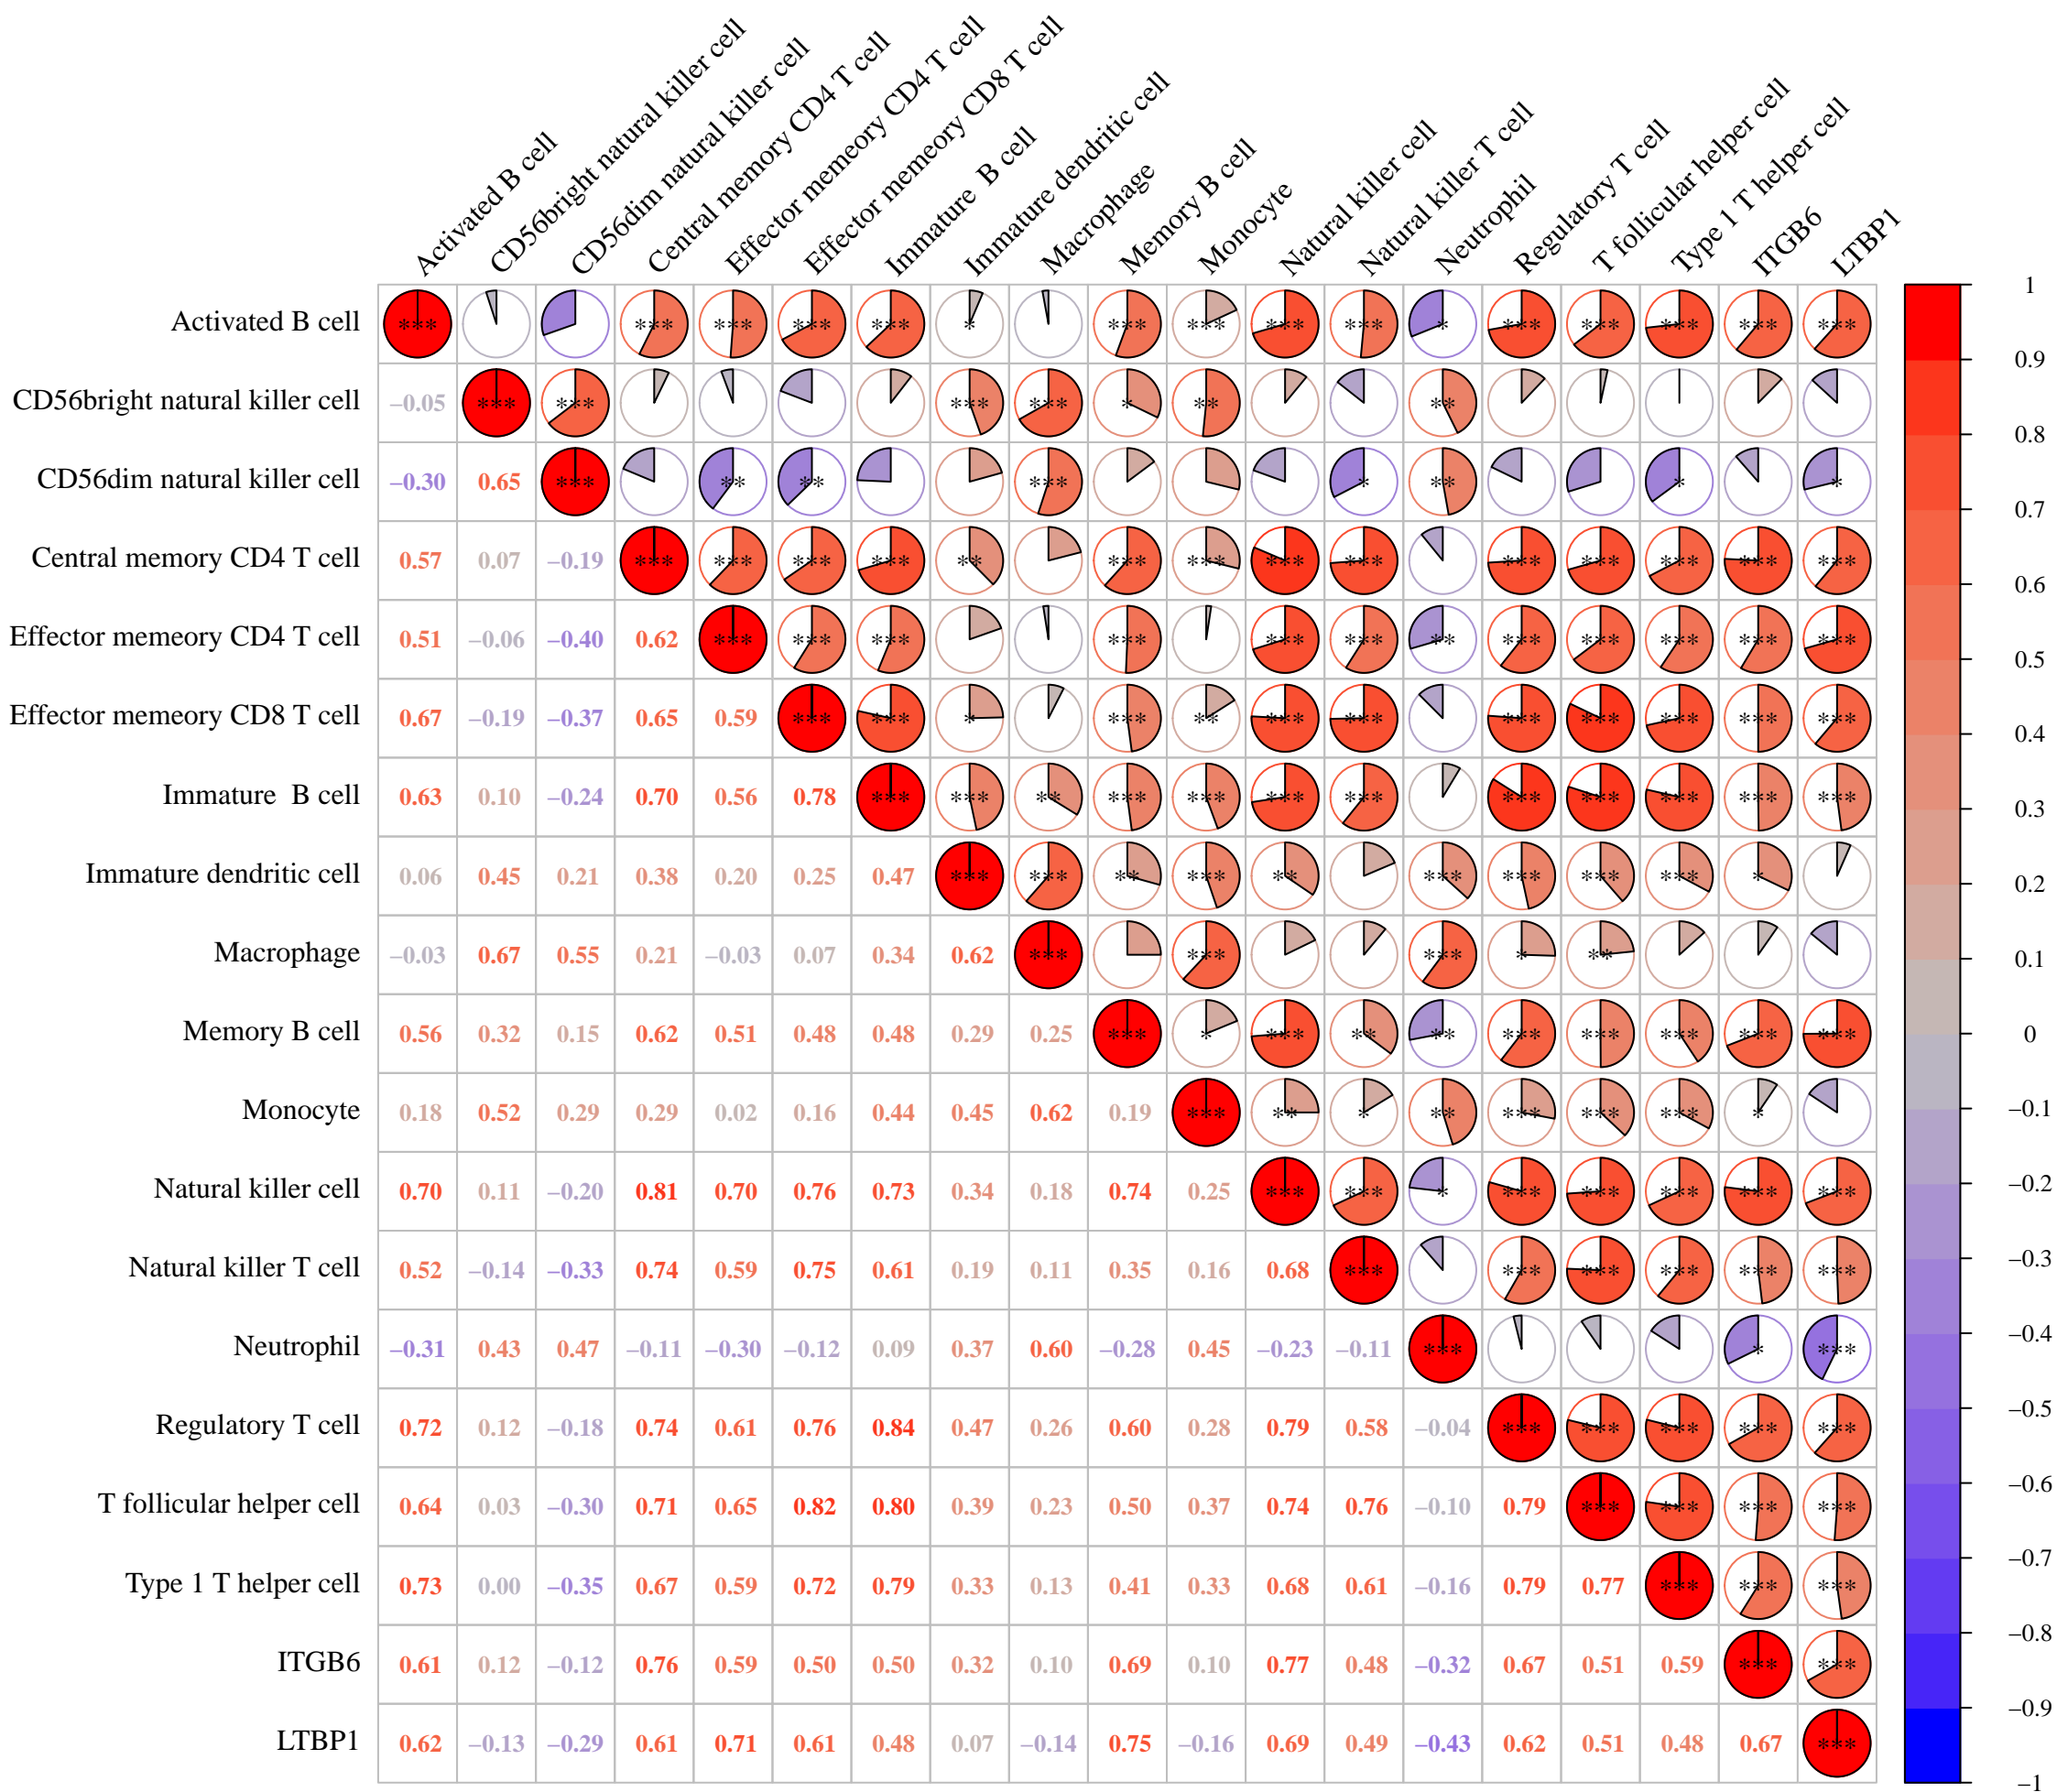

Supplement: Supplementary_raw_data.zip [file 03.cor_heatmap.pdf › supplementary file/11_immune_infiltration/ssGSEA/03.cor_heatmap.pdf]
